# Supplementary material for: Association between serum magnesium concentration and metabolic syndrome, diabetes, hypertension and hyperuricaemia in knee osteoarthritis: a cross-sectional study in Hunan Province, China
Source: PubMed Central journal article supplement — BMJ Open. 2018 Sep 10;8(9):e019159. doi: 10.1136/bmjopen-2017-019159 (PMC6144480; doi:10.1136/bmjopen-2017-019159), 2018-09-10
Supplement: bmjopen-2017-019159.draft_revisions.pdf [file bmjopen-2017-019159.draft_revisions.pdf]

# BMJ Open

BMJ Open is committed to open peer review. As part of this commitment we make the peer review history of every article we publish publicly available.

When an article is published we post the peer reviewers' comments and the authors' responses online. We also post the versions of the paper that were used during peer review. These are the versions that the peer review comments apply to.

The versions of the paper that follow are the versions that were submitted during the peer review process. They are not the versions of record or the final published versions. They should not be cited or distributed as the published version of this manuscript.

BMJ Open is an open access journal and the full, final, typeset and author-corrected version of record of the manuscript is available on our site with no access controls, subscription charges or pay-per-view fees (<http://bmjopen.bmj.com>).

If you have any questions on BMJ Open's open peer review process please email [info.bmjopen@bmj.com](mailto:info.bmjopen@bmj.com)

# BMJ Open

## Association between Serum Magnesium Concentration with Metabolic Syndrome, Diabetes, Hypertension and Hyperuricemia in Knee Osteoarthritis

|                               |                                                                                                                                                                                                                                                                                                                                                                                                                                                                                                                                                                                                                                                                                                                                                                                                                                                                               |
|-------------------------------|-------------------------------------------------------------------------------------------------------------------------------------------------------------------------------------------------------------------------------------------------------------------------------------------------------------------------------------------------------------------------------------------------------------------------------------------------------------------------------------------------------------------------------------------------------------------------------------------------------------------------------------------------------------------------------------------------------------------------------------------------------------------------------------------------------------------------------------------------------------------------------|
| Journal:                      | <i>BMJ Open</i>                                                                                                                                                                                                                                                                                                                                                                                                                                                                                                                                                                                                                                                                                                                                                                                                                                                               |
| Manuscript ID                 | bmjopen-2017-019159                                                                                                                                                                                                                                                                                                                                                                                                                                                                                                                                                                                                                                                                                                                                                                                                                                                           |
| Article Type:                 | Research                                                                                                                                                                                                                                                                                                                                                                                                                                                                                                                                                                                                                                                                                                                                                                                                                                                                      |
| Date Submitted by the Author: | 14-Aug-2017                                                                                                                                                                                                                                                                                                                                                                                                                                                                                                                                                                                                                                                                                                                                                                                                                                                                   |
| Complete List of Authors:     | Wang, Yi-lun; Xiangya Hospital Central South University, Orthopaedics<br>Wei, Jie; Xiangya Hospital Central South University, Health Management Center<br>Zeng, Chao; Xiangya Hospital Central South University, Orthopaedics<br>Yang, Tuo; Xiangya Hospital Central South University, Orthopaedics<br>Li, Hui; Xiangya Hospital Central South University, Orthopaedics<br>Cui, Yang; Xiangya Hospital Central South University, International Medical Center<br>Xie, Dong-xing; Xiangya Hospital, Central South University, Orthopaedics<br>Xu, Bei; Xiangya Hospital Central South University, Orthopaedics<br>Liu, Zhi-chen; Xiangya Hospital Central South University, Orthopaedics<br>Li, Jia-tian; Xiangya Hospital Central South University, Orthopaedics<br>Jiang, Shi-de; Xiangya Hospital Central South University<br>Lei, Guanghua; Xiangya Hospital, Orthopaedics |
| Keywords:                     | osteoarthritis, magnesium, metabolic syndrome, diabetes, Hypertension < CARDIOLOGY, hyperuricemia                                                                                                                                                                                                                                                                                                                                                                                                                                                                                                                                                                                                                                                                                                                                                                             |
|                               |                                                                                                                                                                                                                                                                                                                                                                                                                                                                                                                                                                                                                                                                                                                                                                                                                                                                               |

SCHOLARONE™  
Manuscripts

1  
2  
3 **1 Association between Serum Magnesium Concentration with Metabolic**  
4 **2 Syndrome, Diabetes, Hypertension and Hyperuricemia in Knee Osteoarthritis**

5  
6  
7  
8 3

9  
10 4 Yi-lun Wang<sup>1</sup>, Jie Wei<sup>2</sup>, Chao Zeng<sup>1</sup>, Tuo Yang<sup>1</sup>, Hui Li<sup>1</sup>, Yang Cui<sup>3</sup>, Dong-xing Xie<sup>1</sup>,  
11  
12 5 Bei Xu<sup>1</sup>, Zhi-chen Liu<sup>1</sup>, Jia-tian Li<sup>1</sup>, Shi-de Jiang<sup>1</sup>, Guang-hua Lei<sup>1\*</sup>  
13

14  
15 6

16  
17 7 <sup>1</sup>Department of Orthopaedics, Xiangya Hospital, Central South University, Changsha,  
18  
19 8 Hunan Province, China, 410008;

20  
21  
22 9 <sup>2</sup>Health Management Center, Xiangya Hospital, Central South University, Changsha,  
23  
24 10 Hunan Province, China. 410008;

25  
26 11 <sup>3</sup>International Medical Center, Xiangya Hospital, Central South University, Changsha,  
27  
28 12 Hunan Province, China. 410008;

29  
30  
31 13

32  
33 14 Yi-lun Wang and Jie Wei contributed equally to this article.  
34  
35

36 15

37  
38 16 \*Correspondence to: Guang-hua Lei, MD, PhD, Department of Orthopaedics,  
39  
40 17 Xiangya Hospital, Central South University, #87 Xiangya Road, Changsha, Hunan,  
41  
42 18 China, 410008. E-mail: lgh9640@sina.cn. Tel. 0731-84327326  
43

44  
45 19

46  
47  
48 20

49  
50 21

51  
52  
53 22

1  
2  
3 **Abstract**  
4

5  
6 24 Objectives: This cross-sectional study aimed to examine associations between serum  
7  
8 25 magnesium (Mg) concentration with the prevalence of metabolic syndrome (MetS),  
9  
10 26 diabetes (DM), hypertension (HP) and hyperuricemia (HU) in radiographic knee  
11  
12 27 osteoarthritis (OA) patients. It was hypothesized that serum Mg concentration was  
13  
14 28 inversely associated with these diseases.

15  
16 29 Methods: The present study was conducted at the Health Management Center of  
17  
18 30 Xiangya Hospital. Radiographic OA was evaluated in patients aged over than 40 years  
19  
20 31 with basic characteristics and blood biochemical assessment.

21  
22 32 Results: A total of 962 radiographic knee OA patients were included. The  
23  
24 33 multivariable-adjusted OR (95% CI) showed a significant lower prevalence of MetS  
25  
26 34 in the second (OR=0.58, 0.36-0.94, P=0.026) and highest quintile (OR=0.56, 95CI%  
27  
28 35 0.34-0.93, P=0.024) compared with the reference quintile of serum Mg. Meanwhile, a  
29  
30 36 significant lower prevalence of DM was observed in the second (OR=0.38, 0.22-0.67,  
31  
32 37 P=0.001), third (OR=0.35, 0.19-0.64, P=0.001), fourth (OR=0.27, 0.14-0.53, P<0.001)  
33  
34 38 and highest quintile (OR=0.21, 95CI% 0.10-0.41, P<0.001). A significant lower  
35  
36 39 prevalence of HU was observed in the third (OR=0.36, 0.20-0.63, P<0.001), fourth  
37  
38 40 (OR=0.54, 0.31-0.93, P=0.026) and highest quintile (OR=0.39, 95CI% 0.22-0.68,  
39  
40 41 P=0.001). However, there was no significant association between serum Mg and HP  
41  
42 42 in OA patients.

43  
44 43 Conclusions: The present study indicated that the serum Mg concentration was  
45  
46 44 inversely associated with the prevalence of MetS, DM and HU in radiographic knee  
47  
48 45 OA patients. Thus, elevating serum Mg level is more likely to be associated with the  
49  
50 46 decreasing prevalence of MetS, DM and HU among subjects with knee OA.

51  
52  
53  
54 48 **Level of Evidence:** Level III, cross-sectional study.

1  
2  
3  
4  
5  
6  
7  
8  
9  
10  
11  
12  
13  
14  
15  
16  
17  
18  
19  
20  
21  
22  
23  
24  
25  
26  
27  
28  
29  
30  
31  
32  
33  
34  
35  
36  
37  
38  
39  
40  
41  
42  
43  
44  
45  
46  
47  
48  
49  
50  
51  
52  
53  
54  
55  
56  
57  
58  
59  
60

49 **Key words:** osteoarthritis, magnesium, metabolic syndrome, diabetes, hypertension,  
50 hyperuricemia

For peer review only

1  
2  
3 **69 Strengths and limitations of this study**  
4

- 5  
6 70 1. This is the first study examining the associations between serum magnesium (Mg)  
7  
8 71 and the prevalence of metabolic syndrome, diabetes mellitus, hypertension and  
9  
10 72 hyperuricemia in radiographic knee osteoarthritis patients.  
11  
12 73 2. The multivariable logistical regression models in this study were adjusted by a  
13  
14 74 considerable number of potential confounding factors, which greatly improved the  
15  
16 75 reliability of the results.  
17  
18 76 3. Kidney is the key organ in maintaining Mg homeostasis. This study conducted a  
19  
20 77 sensitivity analysis by adding estimated glomerular filtration rate into  
21  
22 78 multivariable logistic regression models, and the reverse associations remained  
23  
24 79 significant.  
25  
26 80 4. This study adopted cross-sectional design which precluded causal correlations.  
27  
28  
29 81 5. Serum Mg concentration was adopted as the indicator of body Mg content in this  
30  
31 82 study which was not the best indicator of body status.  
32

33  
34 83

35  
36 84

37  
38 85

39  
40 86

41  
42 87

43  
44 88

45  
46 89

47  
48 90

49  
50 91

## 92 Introduction

93 The association between metabolic diseases, especially metabolic syndrome (MetS)<sup>1 2</sup>  
94 and diabetes mellitus (DM),<sup>3-5</sup> with osteoarthritis (OA) has drawn increasing attention  
95 in the past few years, and OA has also been classified into three specific phenotypes  
96 including metabolic OA, age-related OA and injure-related OA.<sup>6</sup> A large number of  
97 researches have indicated that the prevalence of MetS,<sup>7-9</sup> DM<sup>10-18</sup> and hypertension  
98 (HP)<sup>7 9-13 19 20</sup> are either higher in OA patients or associated with OA. In addition,  
99 some other studies reported that MetS,<sup>21 22</sup> DM<sup>23 24</sup> and HP<sup>21 22</sup> are the risk factors of  
100 OA progression. Thus, it appears necessary to pay more attention to the high  
101 prevalence of metabolic diseases in OA patients and even take measures to reduce  
102 their prevalence, which also seems to be beneficial in delaying OA progression.

103 Serum magnesium (Mg), one of the most important micronutrients for human health,  
104 has been reported to be negatively associated with MetS,<sup>25-29</sup> DM<sup>30-38</sup> and HP<sup>30 39-41</sup> by  
105 lots of studies. Furthermore, our previous study showed an inverse association  
106 between serum Mg with hyperuricemia (HU).<sup>42</sup> However, to our best knowledge,  
107 there is not yet a study examined the association between the serum Mg concentration  
108 with the aforementioned metabolic diseases (MetS, DM, HP and HU) in OA patients.  
109 In addition, another study of ours indicated that the serum Mg concentration may be  
110 inversely associated with radiographic knee OA.<sup>43</sup> Therefore, it is reasonably  
111 speculated that the prevalence of MetS, DM, HP and HU in OA patients may be  
112 reduced by elevating the level of serum Mg, which can in turn delay OA progression.  
113 Thus, the objective of the present study was to examine the associations between the  
114 serum Mg concentration with the prevalence of MetS, DM, HP and HU in  
115 radiographic knee OA patients. It was hypothesized that serum Mg concentration was  
116 inversely associated with these diseases.

117

## 118 Methods

## 119 **Study population**

120 The present study was conducted at the Health Management Center of Xiangya  
121 Hospital between October 2013 and November 2014. The study design has been  
122 published previously.<sup>42-46</sup> The protocol of this study was reviewed and approved by  
123 the local Ethics and Research Committee, and the methods were carried out in  
124 “accordance” with the approved guidelines. Also the study population gave informed  
125 consent. Registered nurses interviewed all participants during the examination using a  
126 standard questionnaire, with the purpose to collect information on demographic  
127 characteristics and health-related habits. Participants were selected according to the  
128 following inclusion criteria: 1) 40 years old or above; 2) undergoing weight-bearing  
129 bilateral anteroposterior radiography of the knee, and diagnosed with knee OA  
130 according to Kellgren-Lawrence (K-L) radiographic atlas (knee joint was graded K-L  
131 2 or above); 3) availability of all basic characteristics, including age, gender, body  
132 mass index (BMI) and blood pressure; 4) availability of biochemical test results,  
133 including serum Mg concentration; 5) availability of information related to the living  
134 habits, including education background, activity level, smoking, drinking and  
135 medication status. Initially, this cross-sectional study included 1820 radiographic knee  
136 OA patients aged over than 40 years with sound basic characteristics and needed  
137 blood biochemical assessment (including serum Mg concentration). Among them, 962  
138 patients offered demographic characteristics and health-related habits and they were  
139 finally included in this study.

140

## 141 **Blood biochemistry**

142 All blood samples were drawn after a 12-hour overnight fast and were kept at 4°C  
143 until analysis. All blood test were undertaken using a Beckman Coulter AU 5800  
144 (Beckman Coulter Inc., Brea, CA, USA). The inter- and intra-assay coefficients of  
145 variation were tested by low concentrations (2.5 mmol/L for glucose, 118 µmol/L for



1  
2  
3 146 uric acid and 0.60 mmol/L for serum Mg) and high concentrations (6.7 mmol/L for  
4  
5 147 glucose, 472  $\mu\text{mol/L}$  for uric acid and 1.00 mmol/L for serum Mg) of standard human  
6  
7 148 samples. The intra-assay coefficients of variation were 0.98% (2.5 mmol/L) and 1.72%  
8  
9 149 (6.7 mmol/L) for glucose, 1.39% (118  $\mu\text{mol/L}$ ) and 0.41% (472  $\mu\text{mol/L}$ ) for uric acid,  
10  
11 150 and 1.86% (0.60 mmol/L) and 1.65% (1.00 mmol/L) for serum Mg. The inter-assay  
12  
13 151 coefficients of variation were 2.45% (2.5 mmol/L) and 1.46% (6.7 mmol/L) for  
14  
15 152 glucose, 1.40% (118  $\mu\text{mol/L}$ ) and 1.23% (472  $\mu\text{mol/L}$ ) for uric acid, and 1.87% (0.60  
16  
17 153 mmol/L) and 1.70% (1.00 mmol/L) for serum Mg.

#### 18 19 154 20 21 155 **Assessment of other exposures**

22  
23  
24 156 Blood pressure was measured by an electronic sphygmomanometer. The weight and  
25  
26 157 height of each subjects was measured respectively to calculate the BMI. Participants  
27  
28 158 were asked about their average frequency of physical activity (never, one to two times  
29  
30 159 per week, three to four times per week, five times and above per week) and average  
31  
32 160 duration of physical activity (within half an hour, half an hour to one hour, one to two  
33  
34 161 hours, more than two hours). The smoking, alcohol drinking and medication status  
35  
36 162 were asked face to face.

#### 37 38 163 39 40 164 **Assessment of MetS, DM, HP and HU**

41  
42  
43 165 MetS was diagnosed according to the Chinese Diabetes Society (CDS) criteria.<sup>47-49</sup>  
44  
45 166 CDS criteria for metabolic syndrome requires 3 items or all the four items: (1) BMI  
46  
47 167  $\geq 25$  kg/m<sup>2</sup>; (2) Fasting plasma glucose (FPG)  $\geq 6.1$  mmol/L, or diagnosed DM; (3)  
48  
49 168 Systolic blood pressure (BP)  $\geq 140$  mmHg or diastolic BP  $\geq 90$  mmHg, or treatment of  
50  
51 169 previously diagnosed HP; (4) Triglycerides  $\geq 1.7$  mmol/L and/or HDL-cholesterol  
52  
53 170  $< 0.9$  mmol/L in male or  $< 1.0$  mmol/L in female, or treatment for this lipid  
54  
55 171 abnormality. Subjects with the fasting glucose  $\geq 7.0$  mmol/L or currently undergoing

1  
2  
3 172 drug treatment for blood glucose control were regarded as DM patients, and subjects  
4  
5 173 with the systolic blood pressure  $\geq 140$  mm Hg or diastolic blood pressure  $\geq 90$  mm Hg  
6  
7 174 or currently using antihypertensive medication were regarded as HP patients. HU was  
8  
9 175 defined as uric acid  $\geq 416$   $\mu\text{mol/L}$  for male and  $\geq 360$   $\mu\text{mol/L}$  for female or currently  
10  
11 176 undergoing drug treatment for uric acid control.  
12

13  
14  
15  
16 177

### 178 **Statistical analysis**

179 The continuous data are expressed as mean (standard deviation), and the category data  
180 are expressed in percentage. Differences in continuous data were evaluated by  
181 one-way classification ANOVA (normally distributed data) or Kruskal-Wallis H test  
182 (non-normally distributed data), while differences in category data were assessed by  
183 the  $\chi^2$  test. The serum Mg was classified into five categories based on the quintile  
184 distribution:  $\leq 0.85$ , 0.86-0.89, 0.90-0.92, 0.93-0.96 and  $\geq 0.97$  mmol/L. Logistic  
185 regression was conducted in two models in order to calculate the adjusted ORs with  
186 95% CIs for the associations of serum Mg with MetS, DM, HP and HU. Three models  
187 were adjusted for the association. Model 1 were adjusted for age and sex. Then,  
188 model 2, a multivariable model was adopted. Covariates were chosen based on  
189 previous similar studies.<sup>27 33 50 51</sup> Model 2 for the association between serum Mg and  
190 MetS was adjusted by age (continuous data), gender (male, female), educational level  
191 (high school or above, lower than high school), smoking status (yes, no), activity level  
192 (continuous data) and alcohol drinking status (yes, no). Model 2 for the association  
193 between serum Mg and diabetes was adjusted by age (continuous data), BMI ( $\geq 25$   
194 kg/m<sup>2</sup>,  $< 25$  kg/m<sup>2</sup>), gender (male, female), educational level (high school or above,  
195 lower than high school), smoking status (yes, no), activity level (continuous data),  
196 alcohol drinking status (yes, no), HP (yes, no), and dyslipidemia (yes, no).  
197 Dyslipidemia was defined by triglycerides  $\geq 1.7$  mmol/L and/or HDL-cholesterol  $< 0.9$   
198 mmol/L in male or  $< 1.0$  mmol/L in female, or treatment for this lipid abnormality.  
199  
200

1  
2  
3 199 Model 2 for the association between serum Mg and hypertension was adjusted by age  
4 200 (continuous data), BMI ( $\geq 25$  kg/m<sup>2</sup>,  $< 25$  kg/m<sup>2</sup>), gender (male, female), educational  
5 201 level (high school or above, lower than high school), smoking status (yes, no), activity  
6 202 level (continuous data), alcohol drinking status (yes, no), diabetes (yes, no), and  
7 203 dyslipidemia (yes, no). Model 2 for the association between serum Mg and HU was  
8 204 adjusted by age (continuous data), BMI ( $\geq 25$  kg/m<sup>2</sup>,  $< 25$  kg/m<sup>2</sup>), gender (male,  
9 205 female), educational level (high school or above, lower than high school), smoking  
10 206 status (yes, no), activity level (continuous data), alcohol drinking status (yes, no), HP  
11 207 (yes, no), DM (yes, no) and dyslipidemia (yes, no). Model 3 for all associations were  
12 208 adjusted based on model 2, with additional factor of estimated glomerular filtration  
13 209 rate (eGFR). eGFR was calculated by serum creatinine (Scr), sex, and patients' age.  
14 210 The calculation formula was:  $186 \times \text{Scr}^{-1.154} \times \text{age}^{-0.203} \times 1.210$  (if black)  $\times 0.742$   
15 211 (if female).<sup>52</sup> Tests for linear trends were conducted based on logistic regression using  
16 212 a median variable of Mg concentration in each category. All data analyses were  
17 213 performed using SPSS 17.0;  $P \leq 0.05$  was considered to be statistically significant. All  
18 214 test were two tailed.

215

## 216 Results

217 A total of 962 subjects were included in the present cross-sectional study. The  
218 characteristics of the study population according to quintiles of serum Mg were  
219 illustrated in Table 1. The mean age of the subjects was  $54.9 \pm 7.6$  years old, and there  
220 were 377 females (39.2%). The overall prevalence of MetS, DM, HP and HU in OA  
221 patients were 21.4%, 12.0%, 38.5% and 18.3% respectively. Significant differences  
222 were observed across quintiles of serum Mg for fasting glucose, the prevalence of DM  
223 and HU.

224 Outcomes of multivariable adjusted associations between MetS and serum Mg  
225 concentration were shown in Table 2. The age-sex adjusted OR values (Model 1)

226 suggested a significant lower prevalence of MetS in the second (OR=0.61, 95CI%  
227 0.38-0.97, P=0.038) and highest quintile (OR=0.59, 95CI% 0.36-0.96, P=0.035)  
228 compared with the reference quintile of serum Mg in OA patients, and the P for trend  
229 was 0.090. The multivariable adjusted OR values (Model 2) showed similar outcomes  
230 (OR=0.60, 95CI% 0.37-0.96, P=0.035 in the second quintile; OR=0.61, 95CI%  
231 0.37-0.99, P=0.047 in the fifth quintile), and the P for trend was 0.120. The sensitivity  
232 analysis, by adding eGFR into model 2, also reached similar outcomes - a significant  
233 lower prevalence of MetS in the second (OR=0.58, 0.36-0.94, P=0.026) and highest  
234 quintile (OR=0.56, 95CI% 0.34-0.93, P=0.024) compared with the reference quintile  
235 of serum Mg, and the P for trend was 0.066.

236 Table 3 indicated the multivariable adjusted relations of serum Mg and DM in OA  
237 patients. Both age-sex adjusted OR values (Model 1) and multivariable adjusted OR  
238 values (Model 2) suggested a strong inverse association between serum Mg and  
239 diabetes. The age-sex adjusted ORs for the prevalence of diabetes were 0.38 (95CI%  
240 0.22-0.66, P=0.001), 0.34 (95CI% 0.19-0.61, P<0.001), 0.29 (95CI% 0.15-0.55,  
241 P<0.001), and 0.20 (95CI% 0.10-0.40, P<0.001) in the second, third, fourth and fifth  
242 quintiles of serum Mg respectively, and the P for trend was smaller than 0.0001. The  
243 multivariable adjusted ORs for the prevalence of diabetes were 0.38 (95CI%  
244 0.22-0.66, P=0.001), 0.34 (95CI% 0.19-0.62, P<0.001), 0.27 (95CI% 0.14-0.52,  
245 P<0.001), and 0.20 (95CI% 0.10-0.40, P<0.001) in the second, third, fourth and fifth  
246 quintiles of serum Mg respectively, and the P for trend was smaller than 0.0001. The  
247 sensitivity analysis, by adding eGFR into model 2, showed similar outcomes - a  
248 significant lower prevalence of DM in the second (OR=0.38, 0.22-0.67, P=0.001),  
249 third (OR=0.35, 0.19-0.64, P=0.001), fourth (OR=0.27, 0.14-0.53, P<0.001), and  
250 highest quintile (OR=0.21, 95CI% 0.10-0.41, P<0.001) compared with the reference  
251 quintile of serum Mg, and the P for trend was <0.001.

252 The multivariable-adjusted relations between serum Mg and HP in OA patients were  
253 listed in Table 4. According to the age-sex adjusted ORs (Model 1) and multivariable

254 adjusted ORs (Model 2), there was no significant association between serum Mg and  
255 hypertension, and the P for trend was 0.929 and 0.423, respectively. The sensitivity  
256 analysis, by adding eGFR into model 2, showed the same results.

257 The multivariable-adjusted relations of serum Mg and HU in OA patients were  
258 illustrated in Table 5. Both the age-sex adjusted OR values (Model 1) and the  
259 multivariable adjusted OR values (Model 2) suggested significant decreased  
260 prevalence of HU in the third quintile (age-sex adjusted OR=0.44, 95CI% 0.26-0.75,  
261 P=0.002; multivariable adjusted OR=0.42, 95CI% 0.24-0.73, P=0.002) and fifth  
262 quintile (age-sex adjusted OR=0.51, 95CI% 0.30-0.85, P=0.010; multivariable  
263 adjusted OR=0.50, 95CI% 0.29-0.86, P=0.012) compared with the lowest quintile of  
264 serum Mg, and the P for trend was 0.008 and 0.007, respectively. The sensitivity  
265 analysis, by adding eGFR into model 2, showed similar outcomes - a significant lower  
266 prevalence of HU in the third (OR=0.36, 0.20-0.63, P<0.001), fourth (OR=0.54,  
267 0.31-0.93, P=0.026), and highest quintile (OR=0.39, 95CI% 0.22-0.68, P=0.001)  
268 compared with the reference quintile of serum Mg, and the P for trend was <0.001.

269

## 270 Discussion

271 The results of this study suggested that the serum Mg concentration was negatively  
272 associated with the prevalence of MetS, DM and HU in subjects with radiographic  
273 knee OA. In order to control potential confounders, several covariates such as  
274 characteristics, living habits and underlying diseases were selected, and even the  
275 eGFR was added into the multivariable logistic regression models to eliminate the  
276 influence of renal function on Mg excretion. The reverse associations mentioned  
277 above remained significant after adjustments of confounders. However, such negative  
278 association between serum Mg and the prevalence of HP was not observed in  
279 radiographic knee OA patients.

1  
2  
3 280 Mg, the fourth most abundant cation in human body and the second most profuse  
4  
5 281 intracellular cation, is a metallic cofactor for over 300 enzymatic reactions. It appears  
6  
7 282 to play an important role in glucose metabolism and insulin homeostasis, which are  
8  
9 283 highly correlated with metabolic diseases, especially MetS and DM. The mechanisms  
10  
11 284 involved in the Mg deficiency with MetS, DM and HU are probably multifactorial.  
12  
13 285 The most important one may be insulin resistance, as Mg is essential for insulin action  
14  
15 286 and is a critical cofactor for several enzymes in carbohydrate metabolism, which is  
16  
17 287 important for phosphorylation reactions of tyrosine-kinase in the insulin receptor.<sup>31</sup>  
18  
19 288 <sup>53-57</sup> Incidentally, our previous prospective study involving 62897 person-years of  
20  
21 289 follow-up showed that hematocrit was independently associated with the incidence of  
22  
23 290 HU through, with a high possibility, the insulin resistance mechanism.<sup>58</sup> Other  
24  
25 291 potential mechanisms included cellular calcium homeostasis,<sup>54</sup> glucose  
26  
27 292 transportation,<sup>56</sup> oxidative stress<sup>56</sup> and inflammatory cytokines.<sup>59-61</sup> Of course, it is  
28  
29 293 necessary to highlight the fact that insulin can also induce Mg excretion<sup>62</sup> and produce  
30  
31 294 a significant decline of plasma Mg through ion exchange.<sup>63</sup> Thus, there seems to be a  
32  
33 295 vicious circle between Mg deficiency and insulin resistance.

33 296 MetS<sup>21 22</sup> and DM<sup>4 23 24</sup> were reported to be the risk factors of OA progression. It  
34  
35 297 seems that OA progression may be delayed by elevating the serum Mg level through  
36  
37 298 decreasing the prevalence of MetS and DM. Some other studies proved that the serum  
38  
39 299 Mg level was significantly associated with the high-sensitive C-reactive protein (CRP)  
40  
41 300 concentration,<sup>27 64-66</sup> and higher CRP might serve as a prediction factor for OA  
42  
43 301 progression.<sup>67 68</sup> Thus, OA progression may also be delayed by elevating the serum  
44  
45 302 Mg level through decreasing the level of CRP. Above all, the present study indicated  
46  
47 303 that elevating serum Mg level has the potential to reduce the prevalence of MetS, DM  
48  
49 304 and HU in knee OA patients and may delay the progression of knee OA (Figure 1).  
50  
51 305 However, the specific mechanism needs to be further explored.

52 306 The present study has several strengths. Firstly, this is the first study examining the  
53  
54 307 associations between serum Mg and the prevalence of MetS, DM, HP and HU in

1  
2  
3 308 radiographic knee OA patients. The results of this study will provide a new insight  
4  
5 309 into the treatment of knee OA. Secondly, the multivariable logistical regression  
6  
7 310 models were adjusted by a considerable number of potential confounding factors,  
8  
9 311 which greatly improved the reliability of the results. Thirdly, kidney is the key organ  
10  
11 312 in maintaining Mg homeostasis. This study conducted a sensitivity analysis by adding  
12  
13 313 eGFR into multivariable logistic regression models, and the reverse associations  
14  
15 314 remained significant.

16  
17 315 Limitations of the present study should also be admitted. The cross-sectional design  
18  
19 316 precludes causal correlations, so further prospective studies and intervention trials  
20  
21 317 should be undertaken to establish a causal association between serum Mg with the  
22  
23 318 prevalence of MetS, DM, HP and HU in radiographic knee OA patients. Since no  
24  
25 319 previous research investigated such associations in knee OA patients, the value of this  
26  
27 320 study should not be blotted out by the cross-sectional nature. Another limitation of  
28  
29 321 this study lies in the relatively small sample size, and thus, extensive high-quality  
30  
31 322 researches based on a larger sample are needed. Last but not the least, it is important  
32  
33 323 to highlight that Mg is an intracellular ion; therefore, the serum Mg concentration  
34  
35 324 must be considered as a poor indicator of body magnesium content,<sup>69</sup> even though this  
36  
37 325 parameter has been used in many studies. However, blood magnesium level is the  
38  
39 326 second best indicator of body status.<sup>70</sup>

40  
41 327

## 42 328 **Conclusions**

43  
44  
45 329 The present study indicated that the serum Mg concentration was inversely associated  
46  
47 330 with the prevalence of MetS, DM and HU in radiographic knee OA patients. Thus,  
48  
49 331 elevating serum Mg level is more likely to be associated with the decreasing  
50  
51 332 prevalence of MetS, DM and HU among subjects with knee OA.

52  
53 333



1  
2  
3 334 **Contributors**  
4

5  
6 335 All authors had full access to the data in the study and take responsibility for the  
7  
8 336 integrity of the data and the accuracy of the data analysis. GHL, YLW and JW  
9  
10 337 conceived the study. GHL, YLW and JW were responsible for conception and design  
11  
12 338 of the study and drafted the manuscript. CZ, TY, HL, YC and DXX contributed to  
13  
14 339 data collection. WJ contributed to preparation and data analysis. BX, ZCL, JTL, and  
15  
16 340 SDJ contributed to study retrieval. GHL contributed to revision of the manuscript. All  
17  
18 341 the authors contributed to the interpretation of the data and critically reviewed the  
19  
20 342 manuscript for publication.  
21

22 343

23  
24 344 **Funding**  
25

26 345 This work was supported by the Postdoctoral Science Foundation of Central South  
27  
28 346 University (182130), the Innovation Foundation of the Central South University for  
29  
30 347 Postgraduate (2016zzts511), the National Natural Science Foundation of China (No.  
31  
32 348 81201420, 81272034, 81472130, 81501923), the Provincial Science Foundation of  
33  
34 349 Hunan (No. 14JJ3032), the Scientific Research Project of the Development and  
35  
36 350 Reform Commission of Hunan Province ([2013]1199), the Scientific Research Project  
37  
38 351 of Science and Technology Office of Hunan Province (2013SK2018), the Doctoral  
39  
40 352 Scientific Fund Project of the Ministry of Education of China (20120162110036).  
41

42 353

43  
44 354 **Competing interests**  
45

46  
47 355 The authors declare that they have no conflict of interest.  
48  
49

50 356

51  
52 357 **Ethics approval**  
53  
54



1  
2  
3 358 The protocol of this study was reviewed and approved by the Ethics Committee at  
4  
5 359 Xiangya Hospital.

6  
7  
8 360

9  
10 361 **Data sharing statement**

11  
12  
13 362 The datasets during the current study available from the corresponding author on  
14  
15 363 reasonable request.

16  
17  
18  
19  
20  
21  
22 **REFERENCES**

- 23  
24 1. Zhuo Q, Yang W, Chen J, *et al.* Metabolic syndrome meets osteoarthritis. *Nat Rev Rheumatol*  
25 2012;8:729-37.  
26  
27 2. Katz JD, Agrawal S, Velasquez M. Getting to the heart of the matter: osteoarthritis takes its place  
28 as part of the metabolic syndrome. *Curr Opin Rheumatol* 2010;22:512-9.  
29  
30 3. Berenbaum F. Diabetes-induced osteoarthritis: from a new paradigm to a new phenotype. *Ann*  
31 *Rheum Dis* 2011;70:1354-6.  
32  
33 4. King KB, Rosenthal AK. The adverse effects of diabetes on osteoarthritis: update on clinical  
34 evidence and molecular mechanisms. *Osteoarthritis Cartilage* 2015;23:841-50.  
35  
36 5. Kirkman MS. Osteoarthritis progression: is diabetes a culprit? *Osteoarthritis Cartilage*  
37 2015;23:839-40.  
38  
39 6. Sellam J, Berenbaum F. Is osteoarthritis a metabolic disease? *Joint Bone Spine* 2013;80:568-73.  
40  
41 7. Puenpatom RA, Victor TW. Increased prevalence of metabolic syndrome in individuals with  
42 osteoarthritis: an analysis of NHANES III data. *Postgrad Med* 2009;121:9-20.  
43  
44 8. Shin D. Association between metabolic syndrome, radiographic knee osteoarthritis, and intensity of  
45 knee pain: results of a national survey. *J Clin Endocrinol Metab* 2014;99:3177-83.  
46  
47 9. Calvet J, Orellana C, Larrosa M, *et al.* High prevalence of cardiovascular co-morbidities in patients  
48 with symptomatic knee or hand osteoarthritis. *Scand J Rheumatol* 2015;1-4.  
49  
50  
51  
52  
53  
54  
55

10. Rahman MM, Kopec JA, Cibere J, *et al.* The relationship between osteoarthritis and cardiovascular disease in a population health survey: a cross-sectional study. *BMJ Open* 2013;3:
11. Inoue R, Ishibashi Y, Tsuda E, *et al.* Medical problems and risk factors of metabolic syndrome among radiographic knee osteoarthritis patients in the Japanese general population. *J Orthop Sci* 2011;16:704-9.
12. Hart DJ, Doyle DV, Spector TD. Association between metabolic factors and knee osteoarthritis in women: the Chingford Study. *J Rheumatol* 1995;22:1118-23.
13. Jungmann PM, Kraus MS, Alizai H, *et al.* Association of metabolic risk factors with cartilage degradation assessed by T2 relaxation time at the knee: data from the osteoarthritis initiative. *Arthritis Care Res (Hoboken)* 2013;65:1942-50.
14. Anagnostopoulos I, Zinzaras E, Alexiou I, *et al.* The prevalence of rheumatic diseases in central Greece: a population survey. *BMC Musculoskelet Disord* 2010;11:98.
15. Massengale M, Reichmann WM, Losina E, *et al.* The relationship between hand osteoarthritis and serum leptin concentration in participants of the Third National Health and Nutrition Examination Survey. *Arthritis Res Ther* 2012;14:R132.
16. Nieves-Plaza M, Castro-Santana LE, Font YM, *et al.* Association of hand or knee osteoarthritis with diabetes mellitus in a population of Hispanics from Puerto Rico. *J Clin Rheumatol* 2013;19:1-6.
17. Greiver M, Williamson T, Barber D, *et al.* Prevalence and epidemiology of diabetes in Canadian primary care practices: a report from the Canadian Primary Care Sentinel Surveillance Network. *Can J Diabetes* 2014;38:179-85.
18. Rahman MM, Cibere J, Anis AH, *et al.* Risk of Type 2 Diabetes among Osteoarthritis Patients in a Prospective Longitudinal Study. *Int J Rheumatol* 2014;2014:620920.
19. Reid JL, Morton DJ, Wingard DL, *et al.* Obesity and other cardiovascular disease risk factors and their association with osteoarthritis in Southern California American Indians, 2002-2006. *Ethn Dis* 2010;20:416-22.
20. Birtwhistle R, Morkem R, Peat G, *et al.* Prevalence and management of osteoarthritis in primary care: an epidemiologic cohort study from the Canadian Primary Care Sentinel Surveillance Network. *CMAJ Open* 2015;3:E270-5.
21. Yoshimura N, Muraki S, Oka H, *et al.* Accumulation of metabolic risk factors such as overweight, hypertension, dyslipidaemia, and impaired glucose tolerance raises the risk of occurrence and

- 1  
2  
3 progression of knee osteoarthritis: a 3-year follow-up of the ROAD study. *Osteoarthritis Cartilage*  
4 2012;20:1217-26.  
5  
6  
7 22. Monira HS, Wang Y, Cicuttini FM, *et al.* Incidence of total knee and hip replacement for  
8 osteoarthritis in relation to the metabolic syndrome and its components: a prospective cohort study.  
9 *Semin Arthritis Rheum* 2014;43:429-36.  
10  
11 23. Schett G, Kleyer A, Perricone C, *et al.* Diabetes is an independent predictor for severe osteoarthritis:  
12 results from a longitudinal cohort study. *Diabetes Care* 2013;36:403-9.  
13  
14  
15 24. Eymard F, Parsons C, Edwards MH, *et al.* Diabetes is a risk factor for knee osteoarthritis  
16 progression. *Osteoarthritis Cartilage* 2015;23:851-9.  
17  
18 25. Guerrero-Romero F, Rodriguez-Moran M. Low serum magnesium levels and metabolic syndrome.  
19 *Acta Diabetol* 2002;39:209-13.  
20  
21 26. Guerrero-Romero F, Rodriguez-Moran M. Hypomagnesemia, oxidative stress, inflammation, and  
22 metabolic syndrome. *Diabetes Metab Res Rev* 2006;22:471-6.  
23  
24  
25 27. Evangelopoulos AA, Vallianou NG, Panagiotakos DB, *et al.* An inverse relationship between  
26 cumulating components of the metabolic syndrome and serum magnesium levels. *Nutr Res*  
27 2008;28:659-63.  
28  
29  
30 28. Hjelmessaeth J, Hofso D, Aasheim ET, *et al.* Parathyroid hormone, but not vitamin D, is associated  
31 with the metabolic syndrome in morbidly obese women and men: a cross-sectional study.  
32 *Cardiovasc Diabetol* 2009;8:7.  
33  
34  
35 29. Lima ML, Cruz T, Rodrigues LE, *et al.* Serum and intracellular magnesium deficiency in patients  
36 with metabolic syndrome--evidences for its relation to insulin resistance. *Diabetes Res Clin Pract*  
37 2009;83:257-62.  
38  
39  
40 30. Ma J, Folsom AR, Melnick SL, *et al.* Associations of serum and dietary magnesium with  
41 cardiovascular disease, hypertension, diabetes, insulin, and carotid arterial wall thickness: the  
42 ARIC study. *Atherosclerosis Risk in Communities Study. J Clin Epidemiol* 1995;48:927-40.  
43  
44  
45 31. Kao WH, Folsom AR, Nieto FJ, *et al.* Serum and dietary magnesium and the risk for type 2  
46 diabetes mellitus: the Atherosclerosis Risk in Communities Study. *Arch Intern Med*  
47 1999;159:2151-9.  
48  
49  
50 32. Wang JL, Shaw NS, Yeh HY, *et al.* Magnesium status and association with diabetes in the  
51 Taiwanese elderly. *Asia Pac J Clin Nutr* 2005;14:263-9.  
52  
53  
54 33. Chambers EC, Heshka S, Gallagher D, *et al.* Serum magnesium and type-2 diabetes in African  
55

- Americans and Hispanics: a New York cohort. *J Am Coll Nutr* 2006;25:509-13.
34. Simmons D, Joshi S, Shaw J. Hypomagnesaemia is associated with diabetes: Not pre-diabetes, obesity or the metabolic syndrome. *Diabetes Res Clin Pract* 2010;87:261-6.
35. Sales CH, Pedrosa LF, Lima JG, *et al*. Influence of magnesium status and magnesium intake on the blood glucose control in patients with type 2 diabetes. *Clin Nutr* 2011;30:359-64.
36. Lecube A, Baena-Fustegueras JA, Fort JM, *et al*. Diabetes is the main factor accounting for hypomagnesemia in obese subjects. *PLoS One* 2012;7:e30599.
37. Xu J, Xu W, Yao H, *et al*. Associations of serum and urinary magnesium with the pre-diabetes, diabetes and diabetic complications in the Chinese Northeast population. *PLoS One* 2013;8:e56750.
38. Yang SJ, Hwang SY, Baik SH, *et al*. Serum magnesium level is associated with type 2 diabetes in women with a history of gestational diabetes mellitus: the Korea National Diabetes Program study. *J Korean Med Sci* 2014;29:84-9.
39. Singh RB, Rastogi V, Niaz MA, *et al*. Epidemiological study of magnesium status and risk of hypertension in a rural population of north India. *Magnes Res* 1996;9:173-81.
40. Peacock JM, Folsom AR, Arnett DK, *et al*. Relationship of serum and dietary magnesium to incident hypertension: the Atherosclerosis Risk in Communities (ARIC) Study. *Ann Epidemiol* 1999;9:159-65.
41. Guerrero-Romero F, Rodriguez-Moran M, Hernandez-Ronquillo G, *et al*. Low Serum Magnesium Levels and Its Association with High Blood Pressure in Children. *J Pediatr* 2016;168:93-8.
42. Zeng C, Wang YL, Wei J, *et al*. Association between low serum magnesium concentration and hyperuricemia. *Magnes Res* 2015;28:56-63.
43. Zeng C, Wei J, Li H, *et al*. Relationship between Serum Magnesium Concentration and Radiographic Knee Osteoarthritis. *J Rheumatol* 2015;42:1231-6.
44. Wei J, Zeng C, Gong QY, *et al*. Associations between Dietary Antioxidant Intake and Metabolic Syndrome. *PLoS One* 2015;10:e130876.
45. Xie DX, Xiong YL, Zeng C, *et al*. Association between low dietary zinc and hyperuricaemia in middle-aged and older males in China: a cross-sectional study. *BMJ Open* 2015;5:e8637.
46. Wei J, Zeng C, Gong QY, *et al*. The association between dietary selenium intake and diabetes: a cross-sectional study among middle-aged and older adults. *Nutr J* 2015;14:18.

- 1  
2  
3 47. Expert Panel on Metabolic Syndrome of Chinese Diabetes Society: Recommendations on metabolic  
4 syndrome of Chinese Diabetes Society (Chinese). *Chin J Diabetes* 2004;14:156-61.  
5  
6  
7 48. Pang C, Jia L, Hou X, *et al.* The significance of screening for microvascular diseases in Chinese  
8 community-based subjects with various metabolic abnormalities. *PLoS One* 2014;9:e97928.  
9  
10 49. Zhou H, Guo ZR, Yu LG, *et al.* Evidence on the applicability of the ATPIII, IDF and CDS  
11 metabolic syndrome diagnostic criteria to identify CVD and T2DM in the Chinese population from  
12 a 6.3-year cohort study in mid-eastern China. *Diabetes Res Clin Pract* 2010;90:319-25.  
13  
14  
15 50. Joosten MM, Gansevoort RT, Mukamal KJ, *et al.* Urinary magnesium excretion and risk of  
16 hypertension: the prevention of renal and vascular end-stage disease study. *Hypertension*  
17 2013;61:1161-7.  
18  
19  
20 51. Choi MK, Bae YJ. Association of Magnesium Intake with High Blood Pressure in Korean Adults:  
21 Korea National Health and Nutrition Examination Survey 2007-2009. *PLoS One* 2015;10:e130405.  
22  
23  
24 52. K/DOQI clinical practice guidelines for chronic kidney disease: evaluation, classification, and  
25 stratification. *Am J Kidney Dis* 2002;39:S1-266.  
26  
27  
28 53. Grundy SM, Cleeman JI, Daniels SR, *et al.* Diagnosis and management of the metabolic syndrome:  
29 an American Heart Association/National Heart, Lung, and Blood Institute Scientific Statement.  
30 *Circulation* 2005;112:2735-52.  
31  
32  
33 54. Barbagallo M, Dominguez LJ, Galioto A, *et al.* Role of magnesium in insulin action, diabetes and  
34 cardio-metabolic syndrome X. *Mol Aspects Med* 2003;24:39-52.  
35  
36  
37 55. Song Y, Ridker PM, Manson JE, *et al.* Magnesium intake, C-reactive protein, and the prevalence of  
38 metabolic syndrome in middle-aged and older U.S. women. *Diabetes Care* 2005;28:1438-44.  
39  
40  
41 56. Guerrero-Romero F, Rodriguez-Moran M. Complementary therapies for diabetes: the case for  
42 chromium, magnesium, and antioxidants. *Arch Med Res* 2005;36:250-7.  
43  
44  
45 57. Huerta MG, Roemmich JN, Kington ML, *et al.* Magnesium deficiency is associated with insulin  
46 resistance in obese children. *Diabetes Care* 2005;28:1175-81.  
47  
48  
49 58. Zeng C, Wei J, Yang T, *et al.* Higher blood hematocrit predicts hyperuricemia: a prospective study  
50 of 62,897 person-years of follow-up. *Sci Rep* 2015;5:13765.  
51  
52  
53 59. Bonora E, Targher G, Zenere MB, *et al.* Relationship of uric acid concentration to cardiovascular  
54 risk factors in young men. Role of obesity and central fat distribution. The Verona Young Men  
55 Atherosclerosis Risk Factors Study. *Int J Obes Relat Metab Disord* 1996;20:975-80.  
56  
57  
58  
59  
60

- 1  
2  
3 60. Lyngdoh T, Marques-Vidal P, Paccaud F, *et al.* Elevated serum uric acid is associated with high  
4 circulating inflammatory cytokines in the population-based Colaus study. *PLoS One*  
5 2011;6:e19901.  
6  
7  
8 61. Kirilmaz B, Asgun F, Alioglu E, *et al.* High inflammatory activity related to the number of  
9 metabolic syndrome components. *J Clin Hypertens (Greenwich)* 2010;12:136-44.  
10  
11 62. Djurhuus MS, Skott P, Hother-Nielson O, *et al.* Insulin increases renal magnesium excretion: a  
12 possible cause of magnesium depletion in hyperinsulinaemic states. *Diabet Med* 1995;12:664-9.  
13  
14 63. Paolisso G, Sgambato S, Passariello N, *et al.* Insulin induces opposite changes in plasma and  
15 erythrocyte magnesium concentrations in normal man. *Diabetologia* 1986;29:644-7.  
16  
17 64. Chacko SA SYNL. Relations of dietary magnesium intake to biomarkers of inflammation and  
18 endothelial dysfunction in an ethnically diverse cohort of postmenopausal women. *Diabetes Care*  
19 2010;33:304-10.  
20  
21 65. Bo S DMGS. Dietary magnesium and fiber intakes and inflammatory and metabolic indicators in  
22 middle-aged subjects from a population-based cohort. *Am J Clin Nutr* 2006;84:1062-9.  
23  
24 66. Kim DJ XPLK. Magnesium intake in relation to systemic inflammation, insulin resistance, and the  
25 incidence of diabetes. *Diabetes Care* 2010;33:2604-10.  
26  
27 67. Spector TD HDND. Low-level increases in serum C-reactive protein are present in early  
28 osteoarthritis of the knee and predict progressive disease. *Arthritis Rheum* 1997;40:723-7.  
29  
30 68. Smith JW MTGE. Significance of C-reactive protein in osteoarthritis and total knee arthroplasty  
31 outcomes. *Ther Adv Musculoskelet Dis* 2012;4:315-25.  
32  
33 69. Topf JM, Murray PT. Hypomagnesemia and hypermagnesemia. *Rev Endocr Metab Disord*  
34 2003;4:195-206.  
35  
36 70. Jr. Sabatier M PFAM. A compartmental model of magnesium metabolism in healthy men based on  
37 two stable isotope tracers. *Am J Physiol Regul Integr Comp Physiol* 2003;285:R656-63.  
38  
39  
40  
41  
42  
43  
44  
45  
46  
47  
48  
49  
50  
51  
52  
53  
54  
55  
56  
57  
58  
59  
60

364 Table 1 Basic characteristics of included subjects according to quintiles of serum Mg (n=962)

|                                  | Quintiles of serum Mg |            |            |            |              | P     |
|----------------------------------|-----------------------|------------|------------|------------|--------------|-------|
|                                  | Q1 (lowest)           | Q2         | Q3         | Q4         | Q5 (highest) |       |
| Median Mg concentration (mmol/L) | 0.82                  | 0.87       | 0.91       | 0.94       | 0.99         | -     |
| Participants (n)                 | 200                   | 215        | 190        | 168        | 189          | -     |
| Age (years)                      | 53.8 (7.3)            | 54.6 (7.6) | 55.2 (7.9) | 55.3 (7.1) | 56.1 (8.0)   | 0.062 |
| BMI (kg/m <sup>2</sup> )         | 25.2 (3.2)            | 24.9 (3.2) | 25.0 (3.7) | 25.2 (3.4) | 24.6 (3.2)   | 0.464 |
| Female (%)                       | 37.5                  | 42.3       | 36.8       | 42.3       | 37.0         | 0.627 |
| Smoking (%)                      | 27.5                  | 27.4       | 21.6       | 24.4       | 21.7         | 0.457 |
| Alcohol drinking (%)             | 34.5                  | 36.3       | 40.5       | 41.1       | 38.1         | 0.645 |
| High school diploma (%)          | 45.0                  | 47.4       | 45.3       | 56.5       | 48.1         | 0.184 |
| Activity level (h/w)             | 2.0 (3.5)             | 2.0 (3.3)  | 2.3 (3.5)  | 2.1 (3.1)  | 2.4 (3.5)    | 0.457 |

|                                   |               |              |              |              |              |        |
|-----------------------------------|---------------|--------------|--------------|--------------|--------------|--------|
| Fasting glucose (mmol/l)          | 6.6 (3.0)     | 5.7 (1.7)    | 5.7 (1.4)    | 5.5 (0.9)    | 5.5 (1.6)    | 0.009  |
| Systolic pressure (mm Hg)         | 129.2 (16.9)  | 128.3 (17.9) | 130.4 (16.2) | 128.8 (16.3) | 129.6 (17.7) | 0.837  |
| Diastolic pressure (mm Hg)        | 81.2 (11.8)   | 79.8 (12.1)  | 80.7 (11.0)  | 80.7 (10.7)  | 80.3 (10.5)  | 0.654  |
| HDL-cholesterol (mmol/l)          | 1.5 (0.4)     | 1.5 (0.4)    | 1.5 (0.4)    | 1.5 (0.3)    | 1.5 (0.4)    | 0.374  |
| Triglyceride (mmol/l)             | 2.1 (1.9)     | 1.8 (1.5)    | 2.0 (2.1)    | 1.8 (1.0)    | 2.3 (2.9)    | 0.620  |
| Uric acid ( $\mu\text{mol/l}$ )   | 337.3 (101.7) | 329.0 (80.7) | 321.3 (86.3) | 331.5 (78.0) | 329.4 (81.7) | 0.590  |
| eGFR (ml/min/1.73m <sup>2</sup> ) | 80.2 (14.4)   | 77.7 (10.7)  | 76.0 (10.6)  | 75.8 (10.7)  | 74.3 (12.0)  | <0.001 |
| MetS (%)                          | 26.5          | 17.7         | 25.8         | 19.6         | 17.5         | 0.059  |
| DM (%)                            | 23.5          | 10.7         | 10.0         | 8.3          | 6.3          | <0.001 |
| HP (%)                            | 40.0          | 33.5         | 37.4         | 42.3         | 40.2         | 0.432  |
| HU (%)                            | 25.5          | 19.1         | 13.2         | 18.5         | 14.8         | 0.018  |

365 Data are mean (Standard Deviation), unless otherwise indicated; Mg, magnesium; OA, osteoarthritis; BMI, body mass index; HDL, high density lipoprotein; eGFR,  
 366 estimated glomerular filtration rate; MetS, metabolic syndrome; DM, diabetes mellitus; HP, hypertension; HU, hyperuricemia.



1  
2  
3  
4  
5  
6  
7  
8  
9  
10  
11  
12  
13  
14  
15  
16  
17  
18  
19  
20  
21  
22  
23  
24  
25  
26  
27  
28  
29  
30  
31  
32  
33  
34  
35  
36  
37  
38  
39  
40  
41  
42  
43  
44  
45  
46  
47

367 # P values are for test of difference across all quintiles of serum Mg.

368

369

370

371

372

373

374

375

376

377

378

For peer review only

379 Table 2 Multivariable-adjusted relations of serum Mg and MetS in OA patients (n = 962)

|                                  | Quintiles of serum Mg |                   |                   |                   |                   | <i>P</i> for trend |
|----------------------------------|-----------------------|-------------------|-------------------|-------------------|-------------------|--------------------|
|                                  | Q1 (lowest)           | Q2                | Q3                | Q4                | Q5 (highest)      |                    |
| Median Mg concentration (mmol/L) | 0.82                  | 0.87              | 0.91              | 0.94              | 0.99              | -                  |
| Participants (n)                 | 200                   | 215               | 190               | 168               | 189               | -                  |
| MS (%)                           | 26.5                  | 17.7              | 25.8              | 19.6              | 17.5              | -                  |
| Model 1*                         | 1.00 (reference)      | 0.61 (0.38, 0.97) | 0.97 (0.61, 1.52) | 0.69 (0.42, 1.14) | 0.59 (0.36, 0.96) | 0.090              |
| <i>P</i> value                   | -                     | 0.038             | 0.881             | 0.150             | 0.035             | -                  |
| Model 2*                         | 1.00 (reference)      | 0.60 (0.37, 0.96) | 1.00 (0.63, 1.57) | 0.70 (0.42, 1.15) | 0.61 (0.37, 0.99) | 0.120              |
| <i>P</i> value                   | -                     | 0.035             | 0.99              | 0.160             | 0.047             | -                  |
| Model 3*                         | 1.00 (reference)      | 0.58 (0.36, 0.94) | 0.95 (0.60, 1.50) | 0.66 (0.40, 1.10) | 0.56 (0.34, 0.93) | 0.066              |
| <i>P</i> value                   | -                     | 0.026             | 0.818             | 0.109             | 0.024             | -                  |

1  
2  
3  
4  
5  
6  
7  
8  
9  
10  
11  
12  
13  
14  
15  
16  
17  
18  
19  
20  
21  
22  
23  
24  
25  
26  
27  
28  
29  
30  
31  
32  
33  
34  
35  
36  
37  
38  
39  
40  
41  
42  
43  
44  
45  
46  
47

380 Data are adjusted OR (95% CI), unless otherwise indicated; Mg, magnesium; n, number; OA, osteoarthritis; MetS, metabolic syndrome.

381 \*Model 1 was adjusted for age (continuous data) and gender (male, female); Model 2 was adjusted for age (continuous data), gender (male, female), educational level  
382 (high school or above, lower than high school), smoking status (yes, no), activity level (continuous data), alcohol drinking status (yes, no); Model 3 was adjusted  
383 based on model 2, with additional factor of eGFR (continuous data).

384  
385  
386  
387  
388  
389  
390  
391  
392

For peer review only

393 Table 3 Multivariable-adjusted relations of serum Mg and diabetes in OA patients (n = 962)

|                                  | Quintiles of serum Mg |                   |                   |                   |                   | <i>P</i> for trend |
|----------------------------------|-----------------------|-------------------|-------------------|-------------------|-------------------|--------------------|
|                                  | Q1 (lowest)           | Q2                | Q3                | Q4                | Q5 (highest)      |                    |
| Median Mg concentration (mmol/L) | 0.82                  | 0.87              | 0.91              | 0.94              | 0.99              | -                  |
| Participants (n)                 | 200                   | 215               | 190               | 168               | 189               | -                  |
| Diabetes (%)                     | 23.5                  | 10.7              | 10.0              | 8.3               | 6.3               | -                  |
| Model 1*                         | 1.00 (reference)      | 0.38 (0.22, 0.66) | 0.34 (0.19, 0.61) | 0.29 (0.15, 0.55) | 0.20 (0.10, 0.40) | <0.001             |
| <i>P</i> value                   | -                     | 0.001             | <0.001            | <0.001            | <0.001            | -                  |
| Model 2*                         | 1.00 (reference)      | 0.38 (0.22, 0.66) | 0.34 (0.19, 0.62) | 0.27 (0.14, 0.52) | 0.20 (0.10, 0.40) | <0.001             |
| <i>P</i> value                   | -                     | 0.001             | <0.001            | <0.001            | <0.001            | -                  |
| Model 3*                         | 1.00 (reference)      | 0.38 (0.22, 0.67) | 0.35 (0.19, 0.64) | 0.27 (0.14, 0.53) | 0.21 (0.10, 0.41) | <0.001             |
| <i>P</i> value                   | -                     | 0.001             | 0.001             | <0.001            | <0.001            | -                  |

1  
2  
3  
4  
5  
6  
7  
8  
9  
10  
11  
12  
13  
14  
15  
16  
17  
18  
19  
20  
21  
22  
23  
24  
25  
26  
27  
28  
29  
30  
31  
32  
33  
34  
35  
36  
37  
38  
39  
40  
41  
42  
43  
44  
45  
46  
47

394 Data are adjusted OR (95% CI), unless otherwise indicated; Mg, magnesium; n, number; OA, osteoarthritis.

395 \*Model 1 was adjusted for age (continuous data) and gender (male, female); Model 2 was adjusted for age (continuous data), BMI ( $\geq 25$  kg/m<sup>2</sup>,  $< 25$  kg/m<sup>2</sup>), gender  
396 (male, female), educational level (high school or above, lower than high school), smoking status (yes, no), activity level (continuous data), alcohol drinking status  
397 (yes, no), hypertension (yes, no), and dyslipidemia (yes, no); Model 3 was adjusted based on model 2, with additional factor of eGFR (continuous data).

398

399

400

401

402

403

404

405

406

407 Table 4 Multivariable-adjusted relations of serum Mg and hypertension in OA patients (n = 962)

|                                  | Quintiles of serum Mg |                   |                   |                   |                   | <i>P</i> for trend |
|----------------------------------|-----------------------|-------------------|-------------------|-------------------|-------------------|--------------------|
|                                  | Q1 (lowest)           | Q2                | Q3                | Q4                | Q5 (highest)      |                    |
| Median Mg concentration (mmol/L) | 0.82                  | 0.87              | 0.91              | 0.94              | 0.99              | -                  |
| Participants (n)                 | 200                   | 215               | 190               | 168               | 189               | -                  |
| Hypertension (%)                 | 40.0                  | 33.5              | 37.4              | 42.3              | 40.2              | -                  |
| Model 1*                         | 1.00 (reference)      | 0.71 (0.47, 1.06) | 0.83 (0.54, 1.25) | 1.00 (0.66, 1.54) | 0.89 (0.59, 1.35) | 0.929              |
| <i>P</i> value                   | -                     | 0.095             | 0.368             | 0.987             | 0.582             | -                  |
| Model 2*                         | 1.00 (reference)      | 0.78 (0.51, 1.18) | 0.92 (0.60, 1.41) | 1.16 (0.75, 1.80) | 1.03 (0.67, 1.58) | 0.423              |
| <i>P</i> value                   | -                     | 0.242             | 0.708             | 0.502             | 0.896             | -                  |
| Model 3*                         | 1.00 (reference)      | 0.77 (0.51, 1.17) | 0.90 (0.59, 1.38) | 1.13 (0.73, 1.76) | 0.99 (0.64, 1.53) | 0.524              |
| <i>P</i> value                   | -                     | 0.218             | 0.629             | 0.577             | 0.978             | -                  |

1  
2  
3  
4  
5  
6  
7  
8  
9  
10  
11  
12  
13  
14  
15  
16  
17  
18  
19  
20  
21  
22  
23  
24  
25  
26  
27  
28  
29  
30  
31  
32  
33  
34  
35  
36  
37  
38  
39  
40  
41  
42  
43  
44  
45  
46  
47

408 Data are adjusted OR (95% CI), unless otherwise indicated; Mg, magnesium; n, number; OA, osteoarthritis.

409 \* Model 1 was adjusted for age (continuous data) and gender (male, female); Model 2 was adjusted for age (continuous data), BMI ( $\geq 25$  kg/m<sup>2</sup>,  $< 25$  kg/m<sup>2</sup>), gender  
410 (male, female), educational level (high school or above, lower than high school), smoking status (yes, no), activity level (continuous data), alcohol drinking status  
411 (yes, no), diabetes (yes, no), and dyslipidemia (yes, no); Model 3 was adjusted based on model 2, with additional factor of eGFR (continuous data).

412  
413  
414  
415  
416  
417  
418  
419  
420

For peer review only

421 Table 5 Multivariable-adjusted relations of serum Mg and HU in OA patients (n = 962)

|                                  | Quintiles of serum Mg |                   |                   |                   |                   | <i>P</i> for trend |
|----------------------------------|-----------------------|-------------------|-------------------|-------------------|-------------------|--------------------|
|                                  | Q1 (lowest)           | Q2                | Q3                | Q4                | Q5 (highest)      |                    |
| Median Mg concentration (mmol/L) | 0.82                  | 0.87              | 0.91              | 0.94              | 0.99              | -                  |
| Participants (n)                 | 200                   | 215               | 190               | 168               | 189               | -                  |
| HU (%)                           | 25.5                  | 19.1              | 13.2              | 18.5              | 14.8              | -                  |
| Model 1*                         | 1.00 (reference)      | 0.71 (0.44, 1.14) | 0.44 (0.26, 0.75) | 0.68 (0.41, 1.14) | 0.51 (0.30, 0.85) | 0.008              |
| <i>P</i> value                   | -                     | 0.157             | 0.002             | 0.144             | 0.010             | -                  |
| Model 2*                         | 1.00 (reference)      | 0.73 (0.45, 1.19) | 0.42 (0.24, 0.73) | 0.62 (0.37, 1.06) | 0.50 (0.29, 0.86) | 0.007              |
| <i>P</i> value                   | -                     | 0.205             | 0.002             | 0.082             | 0.012             | -                  |
| Model 3*                         | 1.00 (reference)      | 0.67 (0.41, 1.11) | 0.36 (0.20, 0.63) | 0.54 (0.31, 0.93) | 0.39 (0.22, 0.68) | <0.001             |
| <i>P</i> value                   | -                     | 0.119             | <0.001            | 0.026             | 0.001             | -                  |



1  
2  
3  
4  
5  
6  
7 422 Data are adjusted OR (95% CI), unless otherwise indicated; Mg, magnesium; n, number; OA, osteoarthritis; HU, hyperuricemia.

8  
9 423 \* Model 1 was adjusted for age (continuous data) and gender (male, female); Model 2 was adjusted for age (continuous data), BMI ( $\geq 25$  kg/m<sup>2</sup>,  $< 25$  kg/m<sup>2</sup>), gender  
10  
11 424 (male, female), educational level (high school or above, lower than high school), smoking status (yes, no), activity level (continuous data), alcohol drinking status  
12  
13 425 (yes, no), hypertension (yes, no), diabetes (yes, no), and dyslipidemia (yes, no); Model 3 was adjusted based on model 2, with additional factor of eGFR (continuous  
14  
15 426 data).

16  
17 427

18  
19  
20 428

21  
22  
23 429

24  
25 430

26  
27  
28 431

29  
30  
31 432

32  
33 433

34  
35  
36 434

1  
2  
3  
4  
5  
6  
7 4358  
9 43610  
11 43712  
13  
14  
15 438

16  
17 439 Fig 1 Possible clinical significance of the present study. The present study indicates that elevating serum Mg level is more likely to be associated with decreasing  
18  
19 440 prevalence of MetS, DM and HU among persons with knee OA. In addition to reduce the high-sensitive C-reactive protein level possibly, elevating serum Mg level  
20  
21 441 may delay the progression of knee OA. It seems like elevating the serum Mg can cut off the connection between the prevalence of MetS, DM and HU with knee OA  
22  
23 442 and delay the progression of OA. MetS, metabolic syndrome; DM, diabetes mellitus; HU, hyperuricemia; OA, osteoarthritis; Mg, magnesium.  
24  
25  
26  
27  
28  
29  
30  
31  
32  
33  
34  
35  
36  
37  
38  
39  
40  
41  
42  
43  
44  
45  
46  
47

1  
2  
3  
4  
5  
6  
7  
8  
9  
10  
11  
12  
13  
14  
15  
16  
17  
18  
19  
20  
21  
22  
23  
24  
25  
26  
27  
28  
29  
30  
31  
32  
33  
34  
35  
36  
37  
38  
39  
40  
41  
42  
43  
44  
45  
46

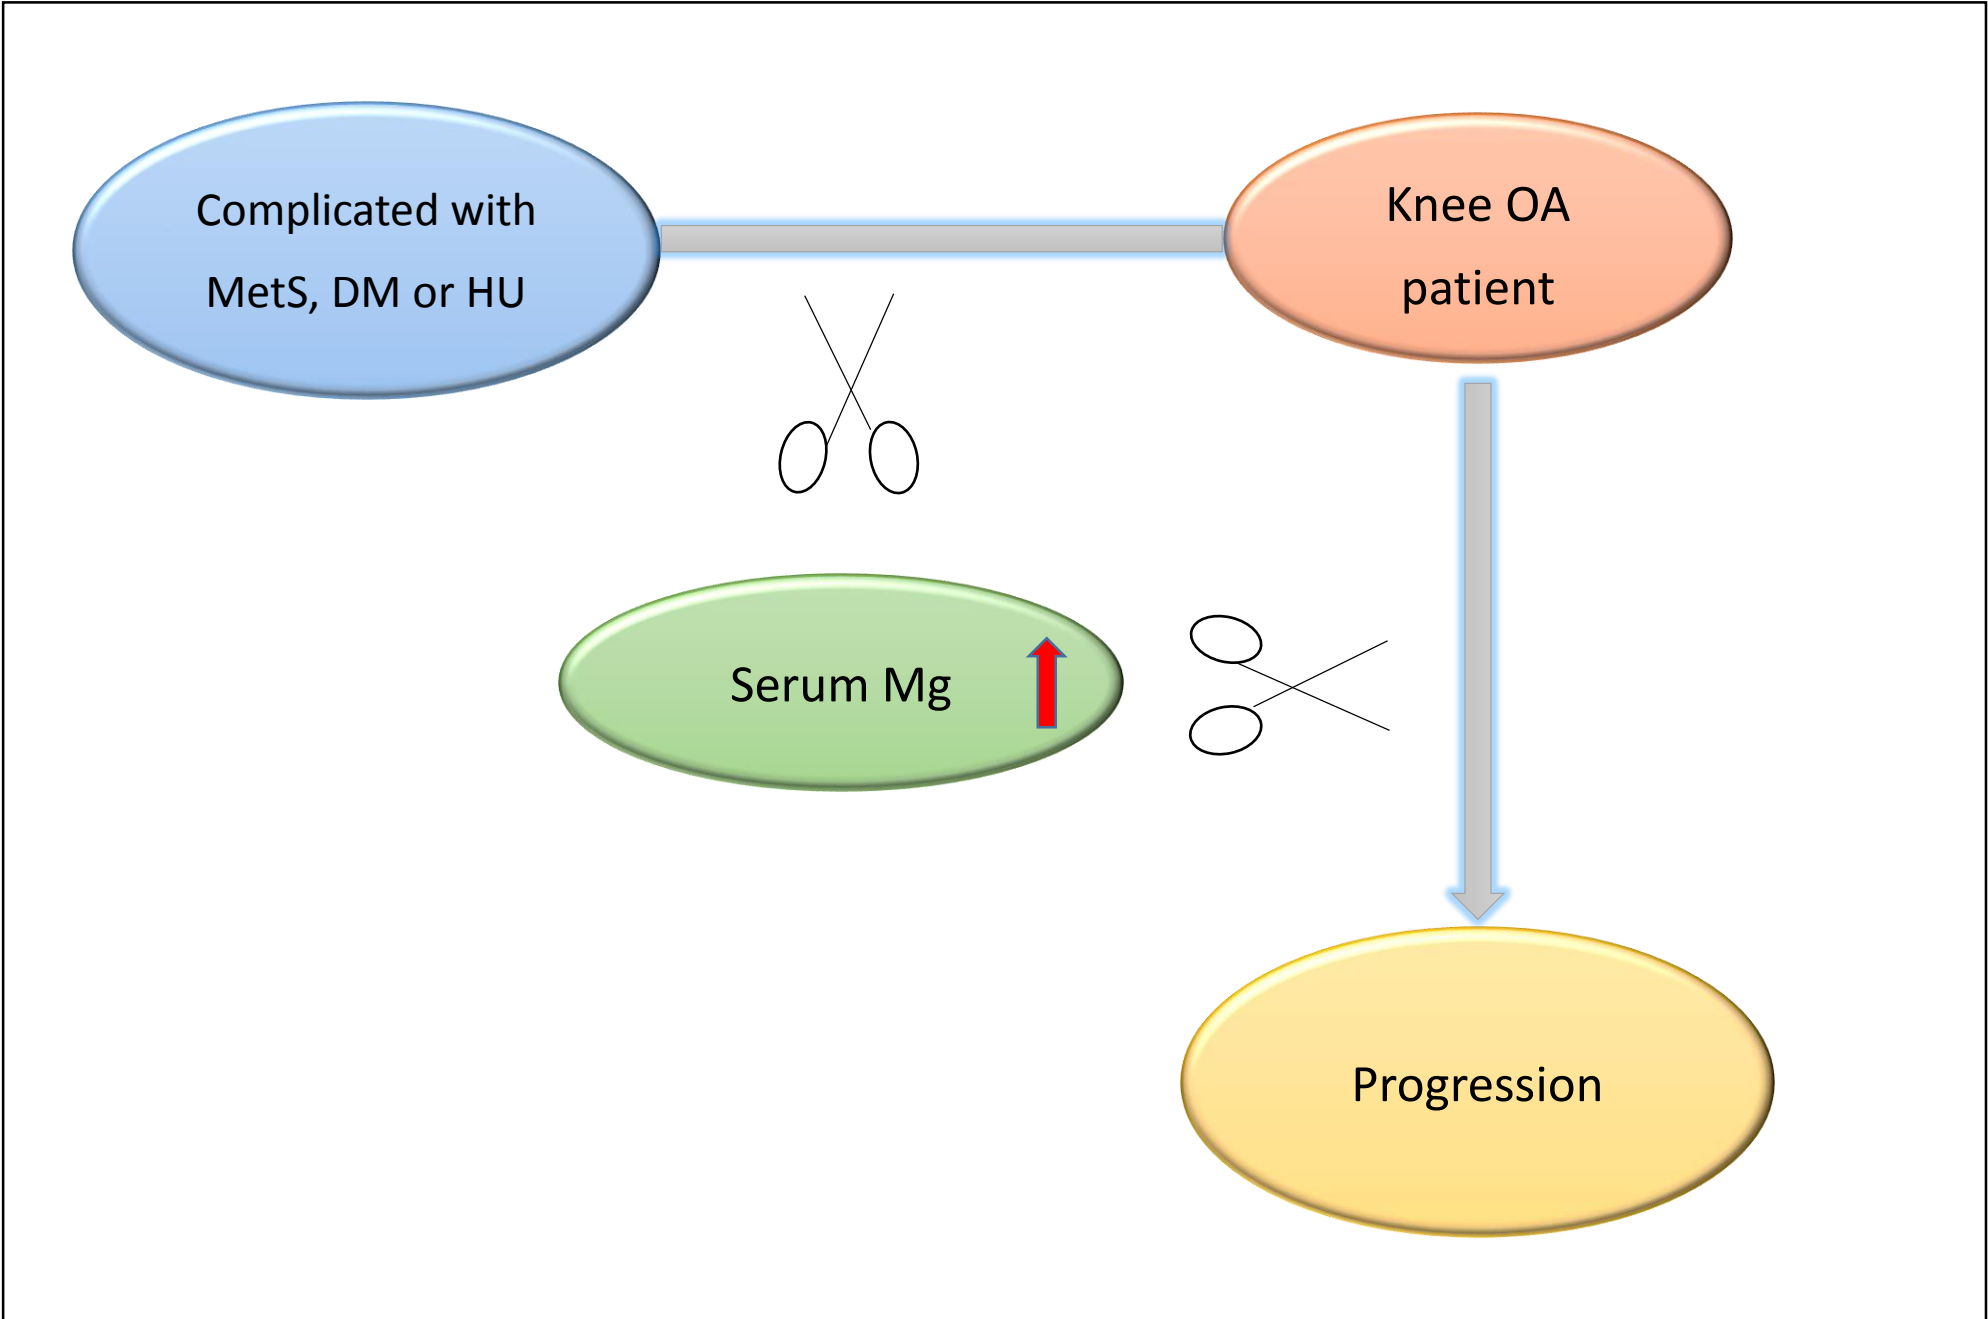

## STROBE Statement—checklist of items that should be included in reports of observational studies

|                           | Item No | Recommendation                                                                                                                                                                                                                                                                                                                                                                                                                                                         | Reported on Page No |
|---------------------------|---------|------------------------------------------------------------------------------------------------------------------------------------------------------------------------------------------------------------------------------------------------------------------------------------------------------------------------------------------------------------------------------------------------------------------------------------------------------------------------|---------------------|
| <b>Title and abstract</b> | 1       | (a) Indicate the study's design with a commonly used term in the title or the abstract                                                                                                                                                                                                                                                                                                                                                                                 | 1                   |
|                           |         | (b) Provide in the abstract an informative and balanced summary of what was done and what was found                                                                                                                                                                                                                                                                                                                                                                    | 1-2                 |
| <b>Introduction</b>       |         |                                                                                                                                                                                                                                                                                                                                                                                                                                                                        |                     |
| Background/rationale      | 2       | Explain the scientific background and rationale for the investigation being reported                                                                                                                                                                                                                                                                                                                                                                                   | 3                   |
| Objectives                | 3       | State specific objectives, including any prespecified hypotheses                                                                                                                                                                                                                                                                                                                                                                                                       | 4                   |
| <b>Methods</b>            |         |                                                                                                                                                                                                                                                                                                                                                                                                                                                                        |                     |
| Study design              | 4       | Present key elements of study design early in the paper                                                                                                                                                                                                                                                                                                                                                                                                                | 4                   |
| Setting                   | 5       | Describe the setting, locations, and relevant dates, including periods of recruitment, exposure, follow-up, and data collection                                                                                                                                                                                                                                                                                                                                        | 4                   |
| Participants              | 6       | (a) <i>Cohort study</i> —Give the eligibility criteria, and the sources and methods of selection of participants. Describe methods of follow-up<br><i>Case-control study</i> —Give the eligibility criteria, and the sources and methods of case ascertainment and control selection. Give the rationale for the choice of cases and controls<br><i>Cross-sectional study</i> —Give the eligibility criteria, and the sources and methods of selection of participants | 4                   |
|                           |         | (b) <i>Cohort study</i> —For matched studies, give matching criteria and number of exposed and unexposed<br><i>Case-control study</i> —For matched studies, give matching criteria and the number of controls per case                                                                                                                                                                                                                                                 | -                   |
| Variables                 | 7       | Clearly define all outcomes, exposures, predictors, potential confounders, and effect modifiers. Give diagnostic criteria, if applicable                                                                                                                                                                                                                                                                                                                               | 5-7                 |
| Data sources/measurement  | 8*      | For each variable of interest, give sources of data and details of methods of assessment (measurement). Describe comparability of assessment methods if there is more than one group                                                                                                                                                                                                                                                                                   | 5-6                 |
| Bias                      | 9       | Describe any efforts to address potential sources of bias                                                                                                                                                                                                                                                                                                                                                                                                              | 6-7                 |
| Study size                | 10      | Explain how the study size was arrived at                                                                                                                                                                                                                                                                                                                                                                                                                              | 4                   |
| Quantitative variables    | 11      | Explain how quantitative variables were handled in the analyses. If applicable, describe which groupings were chosen and why                                                                                                                                                                                                                                                                                                                                           | 6-7                 |
| Statistical methods       | 12      | (a) Describe all statistical methods, including those used to control for confounding                                                                                                                                                                                                                                                                                                                                                                                  | 6-7                 |
|                           |         | (b) Describe any methods used to examine subgroups and interactions                                                                                                                                                                                                                                                                                                                                                                                                    | -                   |
|                           |         | (c) Explain how missing data were addressed                                                                                                                                                                                                                                                                                                                                                                                                                            | -                   |
|                           |         | (d) <i>Cohort study</i> —If applicable, explain how loss to follow-up was addressed<br><i>Case-control study</i> —If applicable, explain how matching of cases and controls was addressed<br><i>Cross-sectional study</i> —If applicable, describe analytical methods taking account of sampling strategy                                                                                                                                                              | 4                   |
|                           |         | (e) Describe any sensitivity analyses                                                                                                                                                                                                                                                                                                                                                                                                                                  | 5-6                 |

Continued on next page

| <b>Results</b>           |     |                                                                                                                                                                                                              |       |
|--------------------------|-----|--------------------------------------------------------------------------------------------------------------------------------------------------------------------------------------------------------------|-------|
| Participants             | 13* | (a) Report numbers of individuals at each stage of study—eg numbers potentially eligible, examined for eligibility, confirmed eligible, included in the study, completing follow-up, and analysed            | 4     |
|                          |     | (b) Give reasons for non-participation at each stage                                                                                                                                                         | 4     |
|                          |     | (c) Consider use of a flow diagram                                                                                                                                                                           | -     |
| Descriptive data         | 14* | (a) Give characteristics of study participants (eg demographic, clinical, social) and information on exposures and potential confounders                                                                     | 7     |
|                          |     | (b) Indicate number of participants with missing data for each variable of interest                                                                                                                          | -     |
|                          |     | (c) <i>Cohort study</i> —Summarise follow-up time (eg, average and total amount)                                                                                                                             | -     |
| Outcome data             | 15* | <i>Cohort study</i> —Report numbers of outcome events or summary measures over time                                                                                                                          | -     |
|                          |     | <i>Case-control study</i> —Report numbers in each exposure category, or summary measures of exposure                                                                                                         | -     |
|                          |     | <i>Cross-sectional study</i> —Report numbers of outcome events or summary measures                                                                                                                           | 7-9   |
| Main results             | 16  | (a) Give unadjusted estimates and, if applicable, confounder-adjusted estimates and their precision (eg, 95% confidence interval). Make clear which confounders were adjusted for and why they were included | 7-9   |
|                          |     | (b) Report category boundaries when continuous variables were categorized                                                                                                                                    | 7-9   |
|                          |     | (c) If relevant, consider translating estimates of relative risk into absolute risk for a meaningful time period                                                                                             | -     |
| Other analyses           | 17  | Report other analyses done—eg analyses of subgroups and interactions, and sensitivity analyses                                                                                                               | 7-9   |
| <b>Discussion</b>        |     |                                                                                                                                                                                                              |       |
| Key results              | 18  | Summarise key results with reference to study objectives                                                                                                                                                     | 9     |
| Limitations              | 19  | Discuss limitations of the study, taking into account sources of potential bias or imprecision. Discuss both direction and magnitude of any potential bias                                                   | 10    |
| Interpretation           | 20  | Give a cautious overall interpretation of results considering objectives, limitations, multiplicity of analyses, results from similar studies, and other relevant evidence                                   | 9-10  |
| Generalisability         | 21  | Discuss the generalisability (external validity) of the study results                                                                                                                                        | 10-11 |
| <b>Other information</b> |     |                                                                                                                                                                                                              |       |
| Funding                  | 22  | Give the source of funding and the role of the funders for the present study and, if applicable, for the original study on which the present article is based                                                | 11    |

\*Give information separately for cases and controls in case-control studies and, if applicable, for exposed and unexposed groups in cohort and cross-sectional studies.

**Note:** An Explanation and Elaboration article discusses each checklist item and gives methodological background and published examples of transparent reporting. The STROBE checklist is best used in conjunction with this article (freely available on the Web sites of PLoS Medicine at <http://www.plosmedicine.org/>, Annals of Internal Medicine at <http://www.annals.org/>, and Epidemiology at <http://www.epidem.com/>). Information on the STROBE Initiative is available at [www.strobe-statement.org](http://www.strobe-statement.org).

# BMJ Open

## Association between Serum Magnesium Concentration with Metabolic Syndrome, Diabetes, Hypertension and Hyperuricemia in Knee Osteoarthritis

|                                 |                                                                                                                                                                                                                                                                                                                                                                                                                                                                                                                                                                                                                                                                                                                                                                                                                                                                               |
|---------------------------------|-------------------------------------------------------------------------------------------------------------------------------------------------------------------------------------------------------------------------------------------------------------------------------------------------------------------------------------------------------------------------------------------------------------------------------------------------------------------------------------------------------------------------------------------------------------------------------------------------------------------------------------------------------------------------------------------------------------------------------------------------------------------------------------------------------------------------------------------------------------------------------|
| Journal:                        | <i>BMJ Open</i>                                                                                                                                                                                                                                                                                                                                                                                                                                                                                                                                                                                                                                                                                                                                                                                                                                                               |
| Manuscript ID                   | bmjopen-2017-019159.R1                                                                                                                                                                                                                                                                                                                                                                                                                                                                                                                                                                                                                                                                                                                                                                                                                                                        |
| Article Type:                   | Research                                                                                                                                                                                                                                                                                                                                                                                                                                                                                                                                                                                                                                                                                                                                                                                                                                                                      |
| Date Submitted by the Author:   | 03-Jan-2018                                                                                                                                                                                                                                                                                                                                                                                                                                                                                                                                                                                                                                                                                                                                                                                                                                                                   |
| Complete List of Authors:       | Wang, Yi-lun; Xiangya Hospital Central South University, Orthopaedics<br>Wei, Jie; Xiangya Hospital Central South University, Health Management Center<br>Zeng, Chao; Xiangya Hospital Central South University, Orthopaedics<br>Yang, Tuo; Xiangya Hospital Central South University, Orthopaedics<br>Li, Hui; Xiangya Hospital Central South University, Orthopaedics<br>Cui, Yang; Xiangya Hospital Central South University, International Medical Center<br>Xie, Dong-xing; Xiangya Hospital, Central South University, Orthopaedics<br>Xu, Bei; Xiangya Hospital Central South University, Orthopaedics<br>Liu, Zhi-chen; Xiangya Hospital Central South University, Orthopaedics<br>Li, Jia-tian; Xiangya Hospital Central South University, Orthopaedics<br>Jiang, Shi-de; Xiangya Hospital Central South University<br>Lei, Guanghua; Xiangya Hospital, Orthopaedics |
| <b>Primary Subject Heading</b>: | Rheumatology                                                                                                                                                                                                                                                                                                                                                                                                                                                                                                                                                                                                                                                                                                                                                                                                                                                                  |
| Secondary Subject Heading:      | Rheumatology, Public health, Epidemiology                                                                                                                                                                                                                                                                                                                                                                                                                                                                                                                                                                                                                                                                                                                                                                                                                                     |
| Keywords:                       | osteoarthritis, magnesium, metabolic syndrome, diabetes, Hypertension < CARDIOLOGY, hyperuricemia                                                                                                                                                                                                                                                                                                                                                                                                                                                                                                                                                                                                                                                                                                                                                                             |
|                                 |                                                                                                                                                                                                                                                                                                                                                                                                                                                                                                                                                                                                                                                                                                                                                                                                                                                                               |

SCHOLARONE™  
Manuscripts

1  
2  
3 **1 Association between Serum Magnesium Concentration with Metabolic**  
4 **2 Syndrome, Diabetes, Hypertension and Hyperuricemia in Knee Osteoarthritis**

6  
7 3

8 4 Yi-lun Wang<sup>1</sup>, Jie Wei<sup>2</sup>, Chao Zeng<sup>1</sup>, Tuo Yang<sup>1</sup>, Hui Li<sup>1</sup>, Yang Cui<sup>3</sup>, Dong-xing Xie<sup>1</sup>,  
9 5 Bei Xu<sup>1</sup>, Zhi-chen Liu<sup>1</sup>, Jia-tian Li<sup>1</sup>, Shi-de Jiang<sup>1</sup>, Guang-hua Lei<sup>1\*</sup>  
10 6

11 7 <sup>1</sup>Department of Orthopaedics, Xiangya Hospital, Central South University, Changsha,  
12 8 Hunan Province, China, 410008;

13 9 <sup>2</sup>Health Management Center, Xiangya Hospital, Central South University, Changsha,  
14 10 Hunan Province, China. 410008;

15 11 <sup>3</sup>International Medical Center, Xiangya Hospital, Central South University, Changsha,  
16 12 Hunan Province, China. 410008;

17 13

18 14 Yi-lun Wang and Jie Wei contributed equally to this article.  
19 15

20 16 \*Correspondence to: Guang-hua Lei, MD, PhD, Department of Orthopaedics,  
21 17 Xiangya Hospital, Central South University, #87 Xiangya Road, Changsha, Hunan,  
22 18 China, 410008. E-mail: lgh9640@sina.cn. Tel. 0731-84327326  
23 19

1  
2  
3 **Abstract**  
4

5 **Objectives:** To examine the associations between serum magnesium (Mg)  
6 concentration with the prevalence of metabolic syndrome (MetS), diabetes mellitus  
7 (DM), hypertension (HP) and hyperuricemia (HU) in radiographic knee osteoarthritis  
8 (OA) patients.  
9  
10

11 **Methods:** The present study was conducted at the Health Management Center of  
12 Xiangya Hospital. Radiographic OA was evaluated for patients aged over 40 years  
13 with basic characteristics and blood biochemical assessment. Serum Mg concentration  
14 was measured using the chemiluminescence method. MetS, DM, HP and HU were  
15 diagnosed based on standard protocols. The associations between serum Mg  
16 concentration with MetS, DM, HP and HU were evaluated by conducting  
17 multivariable adjusted logistic regression.  
18  
19

20 **Results:** A total of 962 radiographic knee OA patients were included. Compared with  
21 the lowest quintile, the multivariable-adjusted odds ratios (ORs) and related 95%  
22 confidence intervals (95%CI) of DM were 0.38 (95%CI 0.22-0.67, P=0.001), 0.35  
23 (95%CI 0.19-0.64, P=0.001), 0.27 (95%CI 0.14-0.53, P<0.001) and 0.21 (95%CI  
24 0.10-0.41, P<0.001) in the second, third, fourth and highest quintiles of serum Mg,  
25 respectively (P for trend <0.001); the multivariable-adjusted ORs of HU were 0.36  
26 (95%CI 0.20-0.63, P<0.001), 0.54 (95%CI 0.31-0.93, P=0.026) and 0.39 (95%CI  
27 0.22-0.68, P=0.001) in the third, fourth and highest quintiles of serum Mg  
28 respectively (P for trend <0.001); and the multivariable-adjusted ORs of MetS were  
29 0.58 (95%CI 0.36-0.94, P=0.026) in the second and 0.56 (95%CI 0.34-0.93, P=0.024)  
30 in the highest quintiles of serum Mg (P for trend =0.066). There was no significant  
31 association between serum Mg and HP in OA patients.  
32  
33

34 **Conclusions:** The serum Mg concentration was inversely associated with the  
35 prevalence of MetS, DM and HU in radiographic knee OA patients.  
36  
37

38 **Level of Evidence:** Level III, cross-sectional study.  
39

40 **Key words:** osteoarthritis, magnesium, metabolic syndrome, diabetes, hypertension,  
41 hyperuricemia  
42  
43

44  
45  
46  
47  
48  
49



1  
2  
3 50 **Strengths and limitations of this study**  
4

- 5 51 1. This is the first study examining the associations between serum magnesium (Mg)  
6 52 and the prevalence of metabolic syndrome, diabetes mellitus, hypertension and  
7 53 hyperuricemia in radiographic knee osteoarthritis patients.  
8  
9 54 2. The multivariable logistical regression models in this study were adjusted for a  
10 55 considerable number of potential confounding factors, which greatly improved the  
11 56 reliability of the results.  
12  
13 57 3. The kidney is the key organ in maintaining Mg homeostasis. This study conducted  
14 58 a sensitivity analysis by adding estimated glomerular filtration rate into the  
15 59 multivariable logistic regression models, and the reverse associations remained  
16 60 significant.  
17  
18 61 4. This study adopted cross-sectional design which precluded causal correlations.  
19  
20 62 5. Serum Mg concentration was adopted as the indicator of body Mg content in this  
21 63 study which may not be the best indicator of body status.  
22  
23  
24  
25  
26  
27  
28  
29  
30  
31  
32  
33  
34  
35  
36  
37  
38  
39  
40  
41  
42  
43  
44  
45  
46  
47  
48  
49  
50  
51  
52  
53  
54  
55  
56  
57  
58  
59  
60

## 65 **Introduction**

66 The association between osteoarthritis (OA) and metabolic diseases, especially  
67 metabolic syndrome (MetS)<sup>1 2</sup> and diabetes mellitus (DM),<sup>3-5</sup> has drawn increasing  
68 attention in the past few years. OA includes three specific phenotypes: metabolic OA,  
69 age-related OA and injury-related OA.<sup>6</sup> A large number of studies have indicated that  
70 the prevalence of MetS,<sup>7-9</sup> DM<sup>10-18</sup> and hypertension (HP)<sup>7 9-13 19 20</sup> is either higher in  
71 OA patients or associated with OA. In addition, some other studies reported that  
72 MetS,<sup>21 22</sup> DM<sup>23 24</sup> and HP<sup>21 22</sup> are risk factors of OA progression. Thus, it appears  
73 necessary to pay more attention and adopt appropriate measures to reduce the high  
74 prevalence of metabolic diseases in OA patients, which also seems to be beneficial in  
75 delaying OA progression.

76 Serum magnesium (Mg), one of the most important micronutrients for human  
77 health, has been reported to be negatively associated with MetS,<sup>25-29</sup> DM<sup>30-38</sup> and HP<sup>30</sup>  
78 <sup>39-41</sup> by lots of studies. Meanwhile, our previous study showed an inverse association  
79 between serum Mg and hyperuricemia (HU).<sup>42</sup> However, to the best knowledge of the  
80 authors, there is not yet a study examining the association between the serum Mg  
81 concentration and the aforementioned metabolic diseases (MetS, DM, HP and HU) in  
82 OA patients. On the other hand, we have previously shown that the serum Mg  
83 concentration may be inversely associated with radiographic knee OA.<sup>43</sup> Therefore,  
84 we speculate that the prevalence of MetS, DM, HP and HU in OA patients may be  
85 reduced by elevating the level of serum Mg, which can in turn delay OA progression.  
86 Thus, the objective of the present study was to examine the associations between the  
87 serum Mg concentration with the prevalence of MetS, DM, HP and HU in  
88 radiographic knee OA patients. It was hypothesized that serum Mg concentration was  
89 inversely associated with these diseases.

## 91 **Methods**

### 92 **Study population**

93 The present study was conducted at the Health Management Center of Xiangya  
94 Hospital between October 2013 and November 2014. The study design has been

1  
2  
3 95 published previously.<sup>42-46</sup> The protocol has been reviewed and approved by the Ethics  
4  
5 96 Committee of Xiangya Hospital, Central South University (reference numbers:  
6  
7 97 201312459), and the methods were developed in “accordance” with the approved  
8  
9 98 guidelines. Informed consent has been obtained from all participants. Registered  
10  
11 99 nurses were engaged to interview all participants during the examination using a  
12  
13 100 standard questionnaire, with the purpose to collect information on demographic  
14  
15 101 characteristics and health-related habits. Participants were selected based on the  
16  
17 102 following inclusion criteria: 1) 40 years old or above; 2) undergoing weight-bearing  
18  
19 103 bilateral anteroposterior radiography of the knee, and diagnosed with knee OA  
20  
21 104 according to the Kellgren-Lawrence (K-L) radiographic atlas (knee joint was graded  
22  
23 105 K-L 2 or above); 3) availability of all basic characteristics, including age, gender,  
24  
25 106 body mass index (BMI) and blood pressure; 4) availability of biochemical test results,  
26  
27 107 including serum Mg concentration; 5) availability of information related to the living  
28  
29 108 habits, including education background, activity level, smoking, drinking and  
30  
31 109 medication status. Initially, the present cross-sectional study retrieved 1820  
32  
33 110 radiographic knee OA patients aged over 40 years who exhibited sound basic  
34  
35 111 characteristics and required blood biochemical assessment (including serum Mg  
36  
37 112 concentration). Among them, 962 patients offered demographic characteristics and  
38  
39 113 health-related habits and were finally included in this study.

114

### 115 **Blood biochemistry**

116 All blood samples were drawn after a 12-hour overnight fast and were kept at 4°C  
117 until analysis. Blood tests were undertaken using the Beckman Coulter AU 5800  
118 (Beckman Coulter Inc., Brea, CA, USA). The inter- and intra-assay coefficients of  
119 variation were tested at both low concentrations (2.5 mmol/L for glucose, 118 µmol/L  
120 for uric acid and 0.60 mmol/L for serum Mg) and high concentrations (6.7 mmol/L for  
121 glucose, 472 µmol/L for uric acid and 1.00 mmol/L for serum Mg) of standard human  
122 samples. The intra-assay coefficients of variation were 0.98% (2.5 mmol/L) and 1.72%  
123 (6.7 mmol/L) for glucose, 1.39% (118 µmol/L) and 0.41% (472 µmol/L) for uric acid,  
124 and 1.86% (0.60 mmol/L) and 1.65% (1.00 mmol/L) for serum Mg respectively. The

1  
2  
3 125 inter-assay coefficients of variation were 2.45% (2.5 mmol/L) and 1.46% (6.7 mmol/L)  
4  
5 126 for glucose, 1.40% (118  $\mu\text{mol/L}$ ) and 1.23% (472  $\mu\text{mol/L}$ ) for uric acid, and 1.87%  
6  
7 127 (0.60 mmol/L) and 1.70% (1.00 mmol/L) for serum Mg respectively.  
8  
9 128

### 10 129 **Assessment of other exposures**

11  
12 130 Blood pressure was measured by an electronic sphygmomanometer. The weight and  
13  
14 131 height of each subjects was measured respectively to calculate the BMI. Information  
15  
16 132 on the average frequency of physical activity (never, one to two times per week, three  
17  
18 133 to four times per week, five times and above per week) and average duration of  
19  
20 134 physical activity (less than half an hour, half an hour to one hour, one to two hours,  
21  
22 135 more than two hours) was collected through survey questionnaire. The smoking,  
23  
24 136 alcohol drinking and medication status were collected during the face-to-face  
25  
26 137 interview.  
27  
28 138

### 29 139 **Assessment of MetS, DM, HP and HU**

30  
31 140 MetS was diagnosed based on the Chinese Diabetes Society (CDS) criteria,<sup>47-49</sup> which  
32  
33 141 requires meeting at least 3 of the following 4 items: (1) BMI  $\geq 25$  kg/m<sup>2</sup>; (2) Fasting  
34  
35 142 plasma glucose (FPG)  $\geq 6.1$  mmol/L, or diagnosed DM; (3) Systolic blood pressure  
36  
37 143 (BP)  $\geq 140$  mmHg or diastolic BP  $\geq 90$  mmHg, or treatment of previously diagnosed  
38  
39 144 HP; (4) Triglycerides  $\geq 1.7$  mmol/L and/or HDL-cholesterol  $< 0.9$  mmol/L in male or  
40  
41 145  $< 1.0$  mmol/L in female, or treatment for this lipid abnormality. Subjects with the  
42  
43 146 fasting glucose  $\geq 7.0$  mmol/L or currently undergoing drug treatment for blood glucose  
44  
45 147 control were regarded as DM patients, and subjects with the systolic blood pressure  
46  
47 148  $\geq 140$  mm Hg or diastolic blood pressure  $\geq 90$  mm Hg or currently undertaking  
48  
49 149 antihypertensive medication were regarded as HP patients. HU was defined as uric  
50  
51 150 acid  $\geq 416$   $\mu\text{mol/L}$  for male and  $\geq 360$   $\mu\text{mol/L}$  for female or currently undergoing drug  
52  
53 151 treatment for uric acid control.  
54  
55 152

### 54 153 **Statistical analysis**

56 154 The continuous data are expressed as mean (standard deviation), and the category data

1  
2  
3 155 are expressed in percentage. Differences in continuous data were evaluated by  
4  
5 156 one-way classification ANOVA (normally distributed data) or Kruskal-Wallis H test  
6  
7 157 (non-normally distributed data), while differences in category data were assessed by  
8  
9 158 the  $\chi^2$  test. The serum Mg was classified into five categories based on the quintile  
10  
11 159 distribution:  $\leq 0.85$ , 0.86-0.89, 0.90-0.92, 0.93-0.96 and  $\geq 0.97$  mmol/L. Logistic  
12  
13 160 regression was conducted in two models in order to calculate the adjusted odds ratios  
14  
15 161 (ORs) with 95% confidence intervals (95%CI) for the associations of serum Mg with  
16  
17 162 MetS, DM, HP and HU. Three models were adjusted for the association. Model 1  
18  
19 163 were adjusted for age and sex. Then, model 2, a multivariable model was adopted.  
20  
21 164 Covariates were chosen based on previous similar studies.<sup>27 33 50 51</sup> Model 2 for the  
22  
23 165 association between serum Mg and MetS was adjusted for age (continuous data),  
24  
25 166 gender (male, female), educational level (high school or above, lower than high  
26  
27 167 school), smoking status (yes, no), activity level (continuous data) and alcohol drinking  
28  
29 168 status (yes, no). Model 2 for the association between serum Mg and DM was adjusted  
30  
31 169 for age (continuous data), BMI ( $\geq 25$  kg/m<sup>2</sup>,  $< 25$  kg/m<sup>2</sup>), gender (male, female),  
32  
33 170 educational level (high school or above, lower than high school), smoking status (yes,  
34  
35 171 no), activity level (continuous data), alcohol drinking status (yes, no), HP (yes, no),  
36  
37 172 and dyslipidemia (yes, no). Dyslipidemia was defined by triglycerides  $\geq 1.7$  mmol/L  
38  
39 173 and/or HDL-cholesterol  $< 0.9$  mmol/L in male or  $< 1.0$  mmol/L in female, or treatment  
40  
41 174 for this lipid abnormality. Model 2 for the association between serum Mg and HP was  
42  
43 175 adjusted for age (continuous data), BMI ( $\geq 25$  kg/m<sup>2</sup>,  $< 25$  kg/m<sup>2</sup>), gender (male,  
44  
45 176 female), educational level (high school or above, lower than high school), smoking  
46  
47 177 status (yes, no), activity level (continuous data), alcohol drinking status (yes, no), DM  
48  
49 178 (yes, no), and dyslipidemia (yes, no). Model 2 for the association between serum Mg  
50  
51 179 and HU was adjusted for age (continuous data), BMI ( $\geq 25$  kg/m<sup>2</sup>,  $< 25$  kg/m<sup>2</sup>), gender  
52  
53 180 (male, female), educational level (high school or above, lower than high school),  
54  
55 181 smoking status (yes, no), activity level (continuous data), alcohol drinking status (yes,  
56  
57 182 no), HP (yes, no), DM (yes, no) and dyslipidemia (yes, no). Model 3 for all  
58  
59 183 associations were adjusted based on model 2, with additional factor of estimated  
60  
184 glomerular filtration rate (eGFR). eGFR was calculated by serum creatinine (Scr), sex,

1  
2  
3 185 and patients' age. The Modification of Diet in Renal Disease (MDRD) of eGFR  
4  
5 186 calculation formula was:  $186 \times \text{Scr}^{-1.154} \times \text{age}^{-0.203} \times 1.210$  (if black)  $\times 0.742$  (if  
6  
7 187 female).<sup>52</sup> Tests for linear trends were conducted based on logistic regression using a  
8  
9 188 median variable of Mg concentration in each category. All data analyses were  
10  
11 189 performed using SPSS 17.0;  $P \leq 0.05$  was considered to be statistically significant. All  
12  
13 190 tests were two tailed.

14  
15 191

## 16 192 **Results**

17  
18 193 A total of 962 subjects (377 females, accounting for 39.2%) were included in the  
19  
20 194 present cross-sectional study. The characteristics of the study population according to  
21  
22 195 quintiles of serum Mg were presented in Table 1. The mean age of the subjects was  
23  
24 196  $54.9 \pm 7.6$  years old. The overall prevalence of MetS, DM, HP and HU in OA patients  
25  
26 197 were 21.4%, 12.0%, 38.5% and 18.3% respectively. Significant differences were  
27  
28 198 observed across the quintiles of serum Mg for fasting glucose, as well as the  
29  
30 199 prevalence of DM and HU.

31  
32 200 The outcomes of multivariable adjusted associations between MetS and serum  
33  
34 201 Mg concentration were shown in Table 2. Compared with the lowest quintile, the  
35  
36 202 age-sex adjusted ORs (Model 1) suggested significant decreased prevalence of MetS  
37  
38 203 in the second (OR=0.61, 95%CI 0.38-0.97, P=0.038) and the highest (OR=0.59,  
39  
40 204 95%CI 0.36-0.96, P=0.035) quintiles of serum Mg (P for trend =0.090); the  
41  
42 205 multivariable adjusted ORs (Model 2) also suggested significant decreased prevalence  
43  
44 206 of MetS in the second (OR=0.60, 95%CI 0.37-0.96, P=0.035) and the highest  
45  
46 207 (OR=0.61, 95%CI 0.37-0.99, P=0.047) quintiles, and the P for trend was 0.120. The  
47  
48 208 sensitivity analysis, by adding eGFR into model 2, also reached similar results -  
49  
50 209 significant lower prevalence of MetS in the second (OR=0.58, 95%CI 0.36-0.94,  
51  
52 210 P=0.026) and the highest quintiles (OR=0.56, 95%CI 0.34-0.93, P=0.024) compared  
53  
54 211 with the reference quintile of serum Mg, and the P for trend was 0.066.

55  
56 212 Table 3 illustrated the multivariable adjusted relations between serum Mg and  
57  
58 213 DM in OA patients. Both the age-sex adjusted OR values (Model 1) and the  
59  
60 214 multivariable adjusted OR values (Model 2) suggested a strong inverse association

1  
2  
3 215 between serum Mg and DM. The age-sex adjusted ORs for the prevalence of DM  
4  
5 216 were 0.38 (95%CI 0.22-0.66, P=0.001), 0.34 (95%CI 0.19-0.61, P<0.001), 0.29  
6  
7 217 (95%CI 0.15-0.55, P<0.001), and 0.20 (95%CI 0.10-0.40, P<0.001) in the second,  
8  
9 218 third, fourth and fifth quintiles of serum Mg respectively, and the P for trend was  
10  
11 219 <0.001. The multivariable adjusted ORs for the prevalence of DM were 0.38 (95%CI  
12  
13 220 0.22-0.66, P=0.001), 0.34 (95%CI 0.19-0.62, P<0.001), 0.27 (95%CI 0.14-0.52,  
14  
15 221 P<0.001), and 0.20 (95%CI 0.10-0.40, P<0.001) in the second, third, fourth and fifth  
16  
17 222 quintiles of serum Mg respectively, and the P for trend was <0.001. The sensitivity  
18  
19 223 analysis, by adding eGFR into model 2, showed similar results - significant lower  
20  
21 224 prevalence of DM in the second (OR=0.38, 95%CI 0.22-0.67, P=0.001), third  
22  
23 225 (OR=0.35, 95%CI 0.19-0.64, P=0.001), fourth (OR=0.27, 95%CI 0.14-0.53, P<0.001),  
24  
25 226 and highest quintiles (OR=0.21, 95%CI 0.10-0.41, P<0.001) compared with the  
26  
27 227 reference quintile of serum Mg, and the P for trend was <0.001.

28  
29 228 The multivariable-adjusted relations between serum Mg and HP in OA patients  
30  
31 229 were illustrated in Table 4. According to both the age-sex adjusted ORs (Model 1) and  
32  
33 230 the multivariable adjusted ORs (Model 2), there was no significant association  
34  
35 231 between serum Mg and HP, and the P for trend were 0.929 and 0.423, respectively.  
36  
37 232 The sensitivity analysis, by adding eGFR into model 2, reached the same results.

38  
39 233 The multivariable-adjusted relations between serum Mg and HU in OA patients  
40  
41 234 were illustrated in Table 5. Both the age-sex adjusted OR values (Model 1) and the  
42  
43 235 multivariable adjusted OR values (Model 2) suggested significant decreased  
44  
45 236 prevalence of HU in the third quintile (age-sex adjusted OR=0.44, 95%CI 0.26-0.75,  
46  
47 237 P=0.002; multivariable adjusted OR=0.42, 95%CI 0.24-0.73, P=0.002) and fifth  
48  
49 238 quintile (age-sex adjusted OR=0.51, 95%CI 0.30-0.85, P=0.010; multivariable  
50  
51 239 adjusted OR=0.50, 95%CI 0.29-0.86, P=0.012) compared with the lowest quintile of  
52  
53 240 serum Mg, and the P for trend were 0.008 and 0.007, respectively. The sensitivity  
54  
55 241 analysis, by adding eGFR into model 2, showed similar outcomes - significant lower  
56  
57 242 prevalence of HU in the third (OR=0.36, 0.20-0.63, P<0.001), fourth (OR=0.54,  
58  
59 243 95%CI 0.31-0.93, P=0.026), and highest quintiles (OR=0.39, 95%CI 0.22-0.68,  
60  
244 P=0.001) compared with the reference quintile of serum Mg, and the P for trend was



1  
2  
3 245 <0.001.  
4  
5 246

6  
7 247 **Discussion**

8 248 The results of this study suggested that the serum Mg concentration was negatively  
9 249 associated with the prevalence of MetS, DM and HU in subjects with radiographic  
10 250 knee OA. In order to control potential confounders, several covariates including  
11 251 characteristics, living habits and underlying diseases were selected, and even the  
12 252 eGFR was added into the multivariable logistic regression models to eliminate the  
13 253 influence of renal function on Mg excretion. The reverse associations mentioned  
14 254 above remained significant after adjustments of these confounders. However, the  
15 255 negative association between serum Mg and the prevalence of HP was not observed in  
16 256 radiographic knee OA patients. Moreover, the linear associations were only observed  
17 257 between serum Mg with DM and HU, but not between serum Mg and MetS.

18 258 Mg, the fourth most abundant cation in human body and the second most profuse  
19 259 intracellular cation, is a metallic cofactor for over 300 enzymatic reactions. It appears  
20 260 to play an important role in glucose metabolism and insulin homeostasis, which are  
21 261 both highly correlated with metabolic diseases, especially MetS and DM. The  
22 262 mechanisms involved in Mg deficiency in patients with MetS, DM and HU are  
23 263 probably multifactorial. The most important factor may be insulin resistance, as Mg is  
24 264 essential for insulin action and is a critical cofactor for several enzymes in  
25 265 carbohydrate metabolism, which is important for the phosphorylation reactions of  
26 266 tyrosine-kinase in the insulin receptor.<sup>31 53-57</sup> Of course, it is necessary to highlight the  
27 267 fact that insulin can also induce Mg excretion<sup>58</sup> and produce a significant decline of  
28 268 plasma Mg through ion exchange.<sup>59</sup> Thus, there seems to be a vicious circle between  
29 269 Mg deficiency and insulin resistance.

30 270 Other potential mechanisms include glucose transportation,<sup>56</sup> oxidative stress<sup>56</sup>  
31 271 and inflammatory cytokines,<sup>60-62</sup> and cellular calcium homeostasis.<sup>54</sup> Mg is an  
32 272 essential cofactor of the high-energy phosphate-bound enzymatic pathways involved  
33 273 in the modulation of glucose transport across cell membranes.<sup>56</sup> It also plays a role in  
34 274 the mechanisms of cellular antioxidant defense.<sup>63</sup> The oxidative stress, defined as a



1  
2  
3 275 persistent imbalance between the excessive production of reactive oxygen species  
4  
5 276 and/or defects in antioxidant defense, has been implicated in the pathogenesis of  
6  
7 277 diabetic complications.<sup>56</sup> Moreover, low serum Mg levels are strongly related to  
8  
9 278 elevated serum concentrations of both tumor necrosis factor alpha and C-reactive  
10  
11 279 protein (CRP),<sup>64</sup> suggesting that Mg deficiency may contribute to the development of  
12  
13 280 low-grade chronic inflammation syndrome and the development of glucose metabolic  
14  
15 281 disorders through the former pathway. In addition, lower Mg concentration can  
16  
17 282 enhance calcium-mediated vasoconstriction, blunt cardiac and smooth muscle  
18  
19 283 relaxation, and thus contribute to BP elevation.<sup>54</sup> However, the decreased serum  
20  
21 284 calcium concentration in radiographic knee OA patients may weaken the association  
22  
23 285 between Mg and HP.<sup>65</sup>

24  
25 286 MetS<sup>21 22</sup> and DM<sup>4 23 24</sup> were reported to be the risk factors of OA progression.  
26  
27 287 Moreover, serum Mg level has been proved to be significantly associated with the  
28  
29 288 CRP concentration,<sup>27 66-68</sup> and higher CRP might serve as a prediction factor for OA  
30  
31 289 progression.<sup>69 70</sup> Thus, OA progression may be delayed by elevating the serum Mg  
32  
33 290 level through reducing the prevalence of MetS and DM and decreasing the level of  
34  
35 291 CRP. Above all, the present study indicated that the elevation of serum Mg level has  
36  
37 292 the potential to reduce the prevalence of MetS, DM and HU in knee OA patients and  
38  
39 293 thereby may delay the progression of knee OA. However, the specific mechanism  
40  
41 294 needs to be further explored.

42  
43 295 The present study has several strengths. Firstly, this is the first study examining  
44  
45 296 the associations between serum Mg and the prevalence of MetS, DM, HP and HU in  
46  
47 297 radiographic knee OA patients. The results of this study will provide a new insight  
48  
49 298 into the treatment of knee OA. Secondly, the multivariable logistical regression  
50  
51 299 models were adjusted for a considerable number of potential confounding factors,  
52  
53 300 which greatly improved the reliability of the results. Thirdly, the kidney is the key  
54  
55 301 organ in maintaining Mg homeostasis. This study conducted a sensitivity analysis by  
56  
57 302 adding eGFR into multivariable logistic regression models which showed that the  
58  
59 303 reverse associations remained significant.

60  
61 304 Limitations of the present study should also be admitted. The cross-sectional

1  
2  
3 305 design precludes causal correlations, so further prospective studies and intervention  
4 306 trials should be undertaken to establish a causal association between serum Mg with  
5 307 the prevalence of MetS, DM, HP and HU in radiographic knee OA patients. Since no  
6 308 previous research investigated such associations in knee OA patients, the value of this  
7 309 study should not be blotted out by the cross-sectional nature. Another limitation of  
8 310 this study lies in the relatively small sample size, and thus, extensive high-quality  
9 311 researches based on a larger sample are needed. Moreover, the dietary intake of Mg in  
10 312 relation to the prevalence of MetS, DM, HP and HU were not assessed in the present  
11 313 study. Last but not the least, it is important to highlight that Mg is an intracellular ion;  
12 314 therefore, the serum Mg concentration must be considered as a poor indicator of body  
13 315 Mg content,<sup>71</sup> even though it has been used in many studies. However, blood Mg level  
14 316 is the second best indicator of body status.<sup>72</sup>  
15  
16  
17  
18  
19  
20  
21  
22  
23  
24  
25  
26

## 27 **Conclusions**

28  
29 319 The present study concluded that the serum Mg concentration was inversely  
30 320 associated with the prevalence of MetS, DM and HU in radiographic knee OA  
31 321 patients.  
32  
33  
34  
35  
36  
37  
38  
39  
40  
41  
42  
43  
44  
45  
46  
47  
48  
49  
50  
51  
52  
53  
54  
55  
56  
57  
58  
59  
60

1  
2  
3 **323 Contributors**

4  
5 324 All authors had full access to the data in the study and take responsibility for the  
6  
7 325 integrity of the data and the accuracy of the data analysis. GHL, YLW and JW  
8  
9 326 conceived the study. GHL, YLW and JW were responsible for conception and design  
10  
11 327 of the study and drafted the manuscript. CZ, TY, HL, YC and DXX contributed to  
12  
13 328 data collection. WJ contributed to preparation and data analysis. BX, ZCL, JTL, and  
14  
15 329 SDJ contributed to study retrieval. GHL contributed to revision of the manuscript. All  
16  
17 330 the authors contributed to the interpretation of the data and critically reviewed the  
18  
19 331 manuscript for publication.

20 332

21 **333 Funding**

22  
23 334 This work was supported by the Postdoctoral Science Foundation of Central South  
24  
25 335 University (182130), the Innovation Foundation of the Central South University for  
26  
27 336 Postgraduate (2016zzts511), the National Natural Science Foundation of China (No.  
28  
29 337 81201420, 81272034, 81472130, 81501923), the Provincial Science Foundation of  
30  
31 338 Hunan (No. 14JJ3032), the Scientific Research Project of the Development and  
32  
33 339 Reform Commission of Hunan Province ([2013]1199), the Scientific Research Project  
34  
35 340 of Science and Technology Office of Hunan Province (2013SK2018), the Doctoral  
36  
37 341 Scientific Fund Project of the Ministry of Education of China (20120162110036).

38 342

39  
40 **343 Competing interests**

41  
42 344 The authors declare that they have no conflict of interest.

43 345

44  
45 **346 Ethics approval**

46  
47 347 The protocol of this study was reviewed and approved by the Ethics Committee at  
48  
49 348 Xiangya Hospital.

50 349

51  
52 **350 Data sharing statement**

53  
54 351 The datasets during the current study available from the corresponding author on  
55  
56 352 reasonable request.

**REFERENCES**

1. Zhuo Q, Yang W, Chen J, *et al*. Metabolic syndrome meets osteoarthritis. *Nat Rev Rheumatol* 2012;8:729-37.
2. Katz JD, Agrawal S, Velasquez M. Getting to the heart of the matter: osteoarthritis takes its place as part of the metabolic syndrome. *Curr Opin Rheumatol* 2010;22:512-9.
3. Berenbaum F. Diabetes-induced osteoarthritis: from a new paradigm to a new phenotype. *Ann Rheum Dis* 2011;70:1354-6.
4. King KB, Rosenthal AK. The adverse effects of diabetes on osteoarthritis: update on clinical evidence and molecular mechanisms. *Osteoarthritis Cartilage* 2015;23:841-50.
5. Kirkman MS. Osteoarthritis progression: is diabetes a culprit? *Osteoarthritis Cartilage* 2015;23:839-40.
6. Sellam J, Berenbaum F. Is osteoarthritis a metabolic disease? *Joint Bone Spine* 2013;80:568-73.
7. Puenpatom RA, Victor TW. Increased prevalence of metabolic syndrome in individuals with osteoarthritis: an analysis of NHANES III data. *Postgrad Med* 2009;121:9-20.
8. Shin D. Association between metabolic syndrome, radiographic knee osteoarthritis, and intensity of knee pain: results of a national survey. *J Clin Endocrinol Metab* 2014;99:3177-83.
9. Calvet J, Orellana C, Larrosa M, *et al*. High prevalence of cardiovascular co-morbidities in patients with symptomatic knee or hand osteoarthritis. *Scand J Rheumatol* 2015;1-4.
10. Rahman MM, Kopec JA, Cibere J, *et al*. The relationship between osteoarthritis and cardiovascular disease in a population health survey: a cross-sectional study. *BMJ Open* 2013;3:
11. Inoue R, Ishibashi Y, Tsuda E, *et al*. Medical problems and risk factors of metabolic syndrome among radiographic knee osteoarthritis patients in the Japanese general population. *J Orthop Sci* 2011;16:704-9.
12. Hart DJ, Doyle DV, Spector TD. Association between metabolic factors and knee osteoarthritis in women: the Chingford Study. *J Rheumatol* 1995;22:1118-23.
13. Jungmann PM, Kraus MS, Alizai H, *et al*. Association of metabolic risk factors with cartilage degradation assessed by T2 relaxation time at the knee: data from the osteoarthritis initiative. *Arthritis Care Res (Hoboken)* 2013;65:1942-50.
14. Anagnostopoulos I, Zinzaras E, Alexiou I, *et al*. The prevalence of rheumatic diseases in central Greece: a population survey. *BMC Musculoskelet Disord* 2010;11:98.
15. Massengale M, Reichmann WM, Losina E, *et al*. The relationship between hand osteoarthritis and serum leptin concentration in participants of the Third National Health and Nutrition Examination Survey. *Arthritis Res Ther* 2012;14:R132.
16. Nieves-Plaza M, Castro-Santana LE, Font YM, *et al*. Association of hand or knee osteoarthritis with diabetes mellitus in a population of Hispanics from Puerto Rico. *J Clin Rheumatol* 2013;19:1-6.
17. Greiver M, Williamson T, Barber D, *et al*. Prevalence and epidemiology of diabetes in Canadian primary care practices: a report from the Canadian Primary Care Sentinel Surveillance Network. *Can J Diabetes* 2014;38:179-85.
18. Rahman MM, Cibere J, Anis AH, *et al*. Risk of Type 2 Diabetes among Osteoarthritis Patients in a Prospective Longitudinal Study. *Int J Rheumatol* 2014;2014:620920.
19. Reid JL, Morton DJ, Wingard DL, *et al*. Obesity and other cardiovascular disease risk factors and their association with osteoarthritis in Southern California American Indians, 2002-2006. *Ethn Dis* 2010;20:416-22.

- 1
- 2
- 3 20. Birtwhistle R, Morkem R, Peat G, *et al.* Prevalence and management of osteoarthritis in primary
- 4 care: an epidemiologic cohort study from the Canadian Primary Care Sentinel Surveillance
- 5 Network. *CMAJ Open* 2015;3:E270-5.
- 6
- 7 21. Yoshimura N, Muraki S, Oka H, *et al.* Accumulation of metabolic risk factors such as overweight,
- 8 hypertension, dyslipidaemia, and impaired glucose tolerance raises the risk of occurrence and
- 9 progression of knee osteoarthritis: a 3-year follow-up of the ROAD study. *Osteoarthritis Cartilage*
- 10 2012;20:1217-26.
- 11
- 12 22. Monira HS, Wang Y, Cicuttini FM, *et al.* Incidence of total knee and hip replacement for
- 13 osteoarthritis in relation to the metabolic syndrome and its components: a prospective cohort study.
- 14 *Semin Arthritis Rheum* 2014;43:429-36.
- 15
- 16 23. Schett G, Kleyer A, Perricone C, *et al.* Diabetes is an independent predictor for severe osteoarthritis:
- 17 results from a longitudinal cohort study. *Diabetes Care* 2013;36:403-9.
- 18
- 19 24. Eymard F, Parsons C, Edwards MH, *et al.* Diabetes is a risk factor for knee osteoarthritis
- 20 progression. *Osteoarthritis Cartilage* 2015;23:851-9.
- 21
- 22 25. Guerrero-Romero F, Rodriguez-Moran M. Low serum magnesium levels and metabolic syndrome.
- 23 *Acta Diabetol* 2002;39:209-13.
- 24
- 25 26. Guerrero-Romero F, Rodriguez-Moran M. Hypomagnesemia, oxidative stress, inflammation, and
- 26 metabolic syndrome. *Diabetes Metab Res Rev* 2006;22:471-6.
- 27
- 28 27. Evangelopoulos AA, Vallianou NG, Panagiotakos DB, *et al.* An inverse relationship between
- 29 cumulating components of the metabolic syndrome and serum magnesium levels. *Nutr Res*
- 30 2008;28:659-63.
- 31
- 32 28. Hjelmessaeth J, Hofso D, Aasheim ET, *et al.* Parathyroid hormone, but not vitamin D, is associated
- 33 with the metabolic syndrome in morbidly obese women and men: a cross-sectional study.
- 34 *Cardiovasc Diabetol* 2009;8:7.
- 35
- 36 29. Lima ML, Cruz T, Rodrigues LE, *et al.* Serum and intracellular magnesium deficiency in patients
- 37 with metabolic syndrome--evidences for its relation to insulin resistance. *Diabetes Res Clin Pract*
- 38 2009;83:257-62.
- 39
- 40 30. Ma J, Folsom AR, Melnick SL, *et al.* Associations of serum and dietary magnesium with
- 41 cardiovascular disease, hypertension, diabetes, insulin, and carotid arterial wall thickness: the
- 42 ARIC study. Atherosclerosis Risk in Communities Study. *J Clin Epidemiol* 1995;48:927-40.
- 43
- 44 31. Kao WH, Folsom AR, Nieto FJ, *et al.* Serum and dietary magnesium and the risk for type 2
- 45 diabetes mellitus: the Atherosclerosis Risk in Communities Study. *Arch Intern Med*
- 46 1999;159:2151-9.
- 47
- 48 32. Wang JL, Shaw NS, Yeh HY, *et al.* Magnesium status and association with diabetes in the
- 49 Taiwanese elderly. *Asia Pac J Clin Nutr* 2005;14:263-9.
- 50
- 51 33. Chambers EC, Heshka S, Gallagher D, *et al.* Serum magnesium and type-2 diabetes in African
- 52 Americans and Hispanics: a New York cohort. *J Am Coll Nutr* 2006;25:509-13.
- 53
- 54 34. Simmons D, Joshi S, Shaw J. Hypomagnesaemia is associated with diabetes: Not pre-diabetes,
- 55 obesity or the metabolic syndrome. *Diabetes Res Clin Pract* 2010;87:261-6.
- 56
- 57 35. Sales CH, Pedrosa LF, Lima JG, *et al.* Influence of magnesium status and magnesium intake on the
- 58 blood glucose control in patients with type 2 diabetes. *Clin Nutr* 2011;30:359-64.
- 59
- 60 36. Lecube A, Baena-Fustegueras JA, Fort JM, *et al.* Diabetes is the main factor accounting for
- hypomagnesemia in obese subjects. *PLoS One* 2012;7:e30599.
37. Xu J, Xu W, Yao H, *et al.* Associations of serum and urinary magnesium with the pre-diabetes,

- 1  
2  
3 diabetes and diabetic complications in the Chinese Northeast population. *PLoS One*  
4 2013;8:e56750.
- 5 38. Yang SJ, Hwang SY, Baik SH, *et al.* Serum magnesium level is associated with type 2 diabetes in  
6 women with a history of gestational diabetes mellitus: the Korea National Diabetes Program study.  
7 *J Korean Med Sci* 2014;29:84-9.
- 8 39. Singh RB, Rastogi V, Niaz MA, *et al.* Epidemiological study of magnesium status and risk of  
9 hypertension in a rural population of north India. *Magnes Res* 1996;9:173-81.
- 10 40. Peacock JM, Folsom AR, Arnett DK, *et al.* Relationship of serum and dietary magnesium to  
11 incident hypertension: the Atherosclerosis Risk in Communities (ARIC) Study. *Ann Epidemiol*  
12 1999;9:159-65.
- 13 41. Guerrero-Romero F, Rodriguez-Moran M, Hernandez-Ronquillo G, *et al.* Low Serum Magnesium  
14 Levels and Its Association with High Blood Pressure in Children. *J Pediatr* 2016;168:93-8.
- 15 42. Zeng C, Wang YL, Wei J, *et al.* Association between low serum magnesium concentration and  
16 hyperuricemia. *Magnes Res* 2015;28:56-63.
- 17 43. Zeng C, Wei J, Li H, *et al.* Relationship between Serum Magnesium Concentration and  
18 Radiographic Knee Osteoarthritis. *J Rheumatol* 2015;42:1231-6.
- 19 44. Wei J, Zeng C, Gong QY, *et al.* Associations between Dietary Antioxidant Intake and Metabolic  
20 Syndrome. *PLoS One* 2015;10:e130876.
- 21 45. Xie DX, Xiong YL, Zeng C, *et al.* Association between low dietary zinc and hyperuricaemia in  
22 middle-aged and older males in China: a cross-sectional study. *BMJ Open* 2015;5:e8637.
- 23 46. Wei J, Zeng C, Gong QY, *et al.* The association between dietary selenium intake and diabetes: a  
24 cross-sectional study among middle-aged and older adults. *Nutr J* 2015;14:18.
- 25 47. Expert Panel on Metabolic Syndrome of Chinese Diabetes Society: Recommendations on metabolic  
26 syndrome of Chinese Diabetes Society (Chinese). *Chin J Diabetes* 2004;14:156-61.
- 27 48. Pang C, Jia L, Hou X, *et al.* The significance of screening for microvascular diseases in Chinese  
28 community-based subjects with various metabolic abnormalities. *PLoS One* 2014;9:e97928.
- 29 49. Zhou H, Guo ZR, Yu LG, *et al.* Evidence on the applicability of the ATPIII, IDF and CDS  
30 metabolic syndrome diagnostic criteria to identify CVD and T2DM in the Chinese population from  
31 a 6.3-year cohort study in mid-eastern China. *Diabetes Res Clin Pract* 2010;90:319-25.
- 32 50. Joosten MM, Gansevoort RT, Mukamal KJ, *et al.* Urinary magnesium excretion and risk of  
33 hypertension: the prevention of renal and vascular end-stage disease study. *Hypertension*  
34 2013;61:1161-7.
- 35 51. Choi MK, Bae YJ. Association of Magnesium Intake with High Blood Pressure in Korean Adults:  
36 Korea National Health and Nutrition Examination Survey 2007-2009. *PLoS One* 2015;10:e130405.
- 37 52. K/DOQI clinical practice guidelines for chronic kidney disease: evaluation, classification, and  
38 stratification. *Am J Kidney Dis* 2002;39:S1-266.
- 39 53. Grundy SM, Cleeman JI, Daniels SR, *et al.* Diagnosis and management of the metabolic syndrome:  
40 an American Heart Association/National Heart, Lung, and Blood Institute Scientific Statement.  
41 *Circulation* 2005;112:2735-52.
- 42 54. Barbagallo M, Dominguez LJ, Galioto A, *et al.* Role of magnesium in insulin action, diabetes and  
43 cardio-metabolic syndrome X. *Mol Aspects Med* 2003;24:39-52.
- 44 55. Song Y, Ridker PM, Manson JE, *et al.* Magnesium intake, C-reactive protein, and the prevalence of  
45 metabolic syndrome in middle-aged and older U.S. women. *Diabetes Care* 2005;28:1438-44.
- 46 56. Guerrero-Romero F, Rodriguez-Moran M. Complementary therapies for diabetes: the case for  
47  
48  
49  
50  
51  
52  
53  
54  
55  
56  
57  
58  
59



- chromium, magnesium, and antioxidants. *Arch Med Res* 2005;36:250-7.
57. Huerta MG, Roemmich JN, Kington ML, *et al*. Magnesium deficiency is associated with insulin resistance in obese children. *Diabetes Care* 2005;28:1175-81.
58. Djurhuus MS, Skott P, Hother-Nielson O, *et al*. Insulin increases renal magnesium excretion: a possible cause of magnesium depletion in hyperinsulinaemic states. *Diabet Med* 1995;12:664-9.
59. Paolisso G, Sgambato S, Passariello N, *et al*. Insulin induces opposite changes in plasma and erythrocyte magnesium concentrations in normal man. *Diabetologia* 1986;29:644-7.
60. Bonora E, Targher G, Zenere MB, *et al*. Relationship of uric acid concentration to cardiovascular risk factors in young men. Role of obesity and central fat distribution. The Verona Young Men Atherosclerosis Risk Factors Study. *Int J Obes Relat Metab Disord* 1996;20:975-80.
61. Lyngdoh T, Marques-Vidal P, Paccaud F, *et al*. Elevated serum uric acid is associated with high circulating inflammatory cytokines in the population-based Colaus study. *PLoS One* 2011;6:e19901.
62. Kirilmaz B, Asgun F, Alioglu E, *et al*. High inflammatory activity related to the number of metabolic syndrome components. *J Clin Hypertens (Greenwich)* 2010;12:136-44.
63. Salmonowicz B, Krzystek-Korpacka M, Noczyńska A. Trace elements, magnesium, and the efficacy of antioxidant systems in children with type 1 diabetes mellitus and in their siblings. *Adv Clin Exp Med* 2014;23:259-68.
64. Rodri'guez-Mora'n M, Guerrero-Romero F. Elevated serum concentration of tumor necrosis factor-alpha is linked to low serum magnesium levels in the obesity-related inflammatory response. *Magnes Res* 2004;17:189-96.
65. Li H, Zeng C, Wei J, *et al*. Serum Calcium Concentration Is Inversely Associated With Radiographic Knee Osteoarthritis: A Cross-Sectional Study. *Medicine (Baltimore)*. 2016;95:e2838.
66. Chacko SA SYNL. Relations of dietary magnesium intake to biomarkers of inflammation and endothelial dysfunction in an ethnically diverse cohort of postmenopausal women. *Diabetes Care* 2010;33:304-10.
67. Bo S DMGS. Dietary magnesium and fiber intakes and inflammatory and metabolic indicators in middle-aged subjects from a population-based cohort. *Am J Clin Nutr* 2006;84:1062-9.
68. Kim DJ XPLK. Magnesium intake in relation to systemic inflammation, insulin resistance, and the incidence of diabetes. *Diabetes Care* 2010;33:2604-10.
69. Spector TD HDND. Low-level increases in serum C-reactive protein are present in early osteoarthritis of the knee and predict progressive disease. *Arthritis Rheum* 1997;40:723-7.
71. Smith JW MTGE. Significance of C-reactive protein in osteoarthritis and total knee arthroplasty outcomes. *Ther Adv Musculoskelet Dis* 2012;4:315-25.
68. Topf JM, Murray PT. Hypomagnesemia and hypermagnesemia. *Rev Endocr Metab Disord* 2003;4:195-206.
72. Jr. Sabatier M PFAM. A compartmental model of magnesium metabolism in healthy men based on two stable isotope tracers. *Am J Physiol Regul Integr Comp Physiol* 2003;285:R656-63.

353 Table 1 Basic characteristics of included subjects according to quintiles of serum Mg (n=962)

|                                  | Quintiles of serum Mg |              |              |              |              | P     |
|----------------------------------|-----------------------|--------------|--------------|--------------|--------------|-------|
|                                  | Q1 (lowest)           | Q2           | Q3           | Q4           | Q5 (highest) |       |
| Median Mg concentration (mmol/L) | 0.82                  | 0.87         | 0.91         | 0.94         | 0.99         | -     |
| Participants (n)                 | 200                   | 215          | 190          | 168          | 189          | -     |
| Age (years)                      | 53.8 (7.3)            | 54.6 (7.6)   | 55.2 (7.9)   | 55.3 (7.1)   | 56.1 (8.0)   | 0.062 |
| BMI (kg/m <sup>2</sup> )         | 25.2 (3.2)            | 24.9 (3.2)   | 25.0 (3.7)   | 25.2 (3.4)   | 24.6 (3.2)   | 0.464 |
| Female (%)                       | 37.5                  | 42.3         | 36.8         | 42.3         | 37.0         | 0.627 |
| Smoking (%)                      | 27.5                  | 27.4         | 21.6         | 24.4         | 21.7         | 0.457 |
| Alcohol drinking (%)             | 34.5                  | 36.3         | 40.5         | 41.1         | 38.1         | 0.645 |
| High school diploma (%)          | 45.0                  | 47.4         | 45.3         | 56.5         | 48.1         | 0.184 |
| Activity level (h/w)             | 2.0 (3.5)             | 2.0 (3.3)    | 2.3 (3.5)    | 2.1 (3.1)    | 2.4 (3.5)    | 0.457 |
| Fasting glucose (mmol/l)         | 6.6 (3.0)             | 5.7 (1.7)    | 5.7 (1.4)    | 5.5 (0.9)    | 5.5 (1.6)    | 0.009 |
| Systolic pressure (mm Hg)        | 129.2 (16.9)          | 128.3 (17.9) | 130.4 (16.2) | 128.8 (16.3) | 129.6 (17.7) | 0.837 |
| Diastolic pressure (mm Hg)       | 81.2 (11.8)           | 79.8 (12.1)  | 80.7 (11.0)  | 80.7 (10.7)  | 80.3 (10.5)  | 0.654 |
| HDL-cholesterol (mmol/l)         | 1.5 (0.4)             | 1.5 (0.4)    | 1.5 (0.4)    | 1.5 (0.3)    | 1.5 (0.4)    | 0.374 |
| Triglyceride (mmol/l)            | 2.1 (1.9)             | 1.8 (1.5)    | 2.0 (2.1)    | 1.8 (1.0)    | 2.3 (2.9)    | 0.620 |



1  
2  
3  
4  
5  
6  
7  
8  
9  
10  
11  
12  
13  
14  
15  
16  
17  
18  
19  
20  
21  
22  
23  
24  
25  
26  
27  
28  
29  
30  
31  
32  
33  
34  
35  
36  
37  
38  
39  
40  
41  
42  
43  
44  
45  
46  
47

|                                   |               |              |              |              |              |        |
|-----------------------------------|---------------|--------------|--------------|--------------|--------------|--------|
| Uric acid (µmol/l)                | 337.3 (101.7) | 329.0 (80.7) | 321.3 (86.3) | 331.5 (78.0) | 329.4 (81.7) | 0.590  |
| eGFR (ml/min/1.73m <sup>2</sup> ) | 80.2 (14.4)   | 77.7 (10.7)  | 76.0 (10.6)  | 75.8 (10.7)  | 74.3 (12.0)  | <0.001 |
| MetS (%)                          | 26.5          | 17.7         | 25.8         | 19.6         | 17.5         | 0.059  |
| DM (%)                            | 23.5          | 10.7         | 10.0         | 8.3          | 6.3          | <0.001 |
| HP (%)                            | 40.0          | 33.5         | 37.4         | 42.3         | 40.2         | 0.432  |
| HU (%)                            | 25.5          | 19.1         | 13.2         | 18.5         | 14.8         | 0.018  |

354 Data are mean (Standard Deviation), unless otherwise indicated; Mg, magnesium; OA, osteoarthritis; BMI, body mass index; HDL, high density lipoprotein; eGFR,  
 355 estimated glomerular filtration rate; MetS, metabolic syndrome; DM, diabetes mellitus; HP, hypertension; HU, hyperuricemia.

356 # P values are for test of difference across all quintiles of serum Mg.

358 Table 2 Multivariable-adjusted relations of serum Mg and MetS in OA patients (n = 962)

|                                  | Quintiles of serum Mg |                   |                   |                   |                   | <i>P</i> for trend |
|----------------------------------|-----------------------|-------------------|-------------------|-------------------|-------------------|--------------------|
|                                  | Q1 (lowest)           | Q2                | Q3                | Q4                | Q5 (highest)      |                    |
| Median Mg concentration (mmol/L) | 0.82                  | 0.87              | 0.91              | 0.94              | 0.99              | -                  |
| Participants (n)                 | 200                   | 215               | 190               | 168               | 189               | -                  |
| MetS (%)                         | 26.5                  | 17.7              | 25.8              | 19.6              | 17.5              | -                  |
| Model 1*                         | 1.00 (reference)      | 0.61 (0.38, 0.97) | 0.97 (0.61, 1.52) | 0.69 (0.42, 1.14) | 0.59 (0.36, 0.96) | 0.090              |
| <i>P</i> value                   | -                     | 0.038             | 0.881             | 0.150             | 0.035             | -                  |
| Model 2*                         | 1.00 (reference)      | 0.60 (0.37, 0.96) | 1.00 (0.63, 1.57) | 0.70 (0.42, 1.15) | 0.61 (0.37, 0.99) | 0.120              |
| <i>P</i> value                   | -                     | 0.035             | 0.99              | 0.160             | 0.047             | -                  |
| Model 3*                         | 1.00 (reference)      | 0.58 (0.36, 0.94) | 0.95 (0.60, 1.50) | 0.66 (0.40, 1.10) | 0.56 (0.34, 0.93) | 0.066              |
| <i>P</i> value                   | -                     | 0.026             | 0.818             | 0.109             | 0.024             | -                  |

359 Data are adjusted OR (95% CI), unless otherwise indicated; Mg, magnesium; n, number; OA, osteoarthritis; MetS, metabolic syndrome.

360 \*Model 1 was adjusted for age (continuous data) and gender (male, female); Model 2 was adjusted for age (continuous data), gender (male, female), educational level  
 361 (high school or above, lower than high school), smoking status (yes, no), activity level (continuous data), alcohol drinking status (yes, no); Model 3 was adjusted  
 362 based on model 2, with additional factor of eGFR (continuous data).

363

364 Table 3 Multivariable-adjusted relations of serum Mg and DM in OA patients (n = 962)

|                                  | Quintiles of serum Mg |                   |                   |                   |                   | P for trend |
|----------------------------------|-----------------------|-------------------|-------------------|-------------------|-------------------|-------------|
|                                  | Q1 (lowest)           | Q2                | Q3                | Q4                | Q5 (highest)      |             |
| Median Mg concentration (mmol/L) | 0.82                  | 0.87              | 0.91              | 0.94              | 0.99              | -           |
| Participants (n)                 | 200                   | 215               | 190               | 168               | 189               | -           |
| DM (%)                           | 23.5                  | 10.7              | 10.0              | 8.3               | 6.3               | -           |
| Model 1*                         | 1.00 (reference)      | 0.38 (0.22, 0.66) | 0.34 (0.19, 0.61) | 0.29 (0.15, 0.55) | 0.20 (0.10, 0.40) | <0.001      |
| P value                          | -                     | 0.001             | <0.001            | <0.001            | <0.001            | -           |
| Model 2*                         | 1.00 (reference)      | 0.38 (0.22, 0.66) | 0.34 (0.19, 0.62) | 0.27 (0.14, 0.52) | 0.20 (0.10, 0.40) | <0.001      |
| P value                          | -                     | 0.001             | <0.001            | <0.001            | <0.001            | -           |
| Model 3*                         | 1.00 (reference)      | 0.38 (0.22, 0.67) | 0.35 (0.19, 0.64) | 0.27 (0.14, 0.53) | 0.21 (0.10, 0.41) | <0.001      |
| P value                          | -                     | 0.001             | 0.001             | <0.001            | <0.001            | -           |

365 Data are adjusted OR (95% CI), unless otherwise indicated; Mg, magnesium; n, number; OA, osteoarthritis; DM, diabetes mellitus.

366 \*Model 1 was adjusted for age (continuous data) and gender (male, female); Model 2 was adjusted for age (continuous data), BMI ( $\geq 25$  kg/m<sup>2</sup>,  $< 25$  kg/m<sup>2</sup>), gender  
367 (male, female), educational level (high school or above, lower than high school), smoking status (yes, no), activity level (continuous data), alcohol drinking status  
368 (yes, no), hypertension (yes, no), and dyslipidemia (yes, no); Model 3 was adjusted based on model 2, with additional factor of eGFR (continuous data).

369

370 Table 4 Multivariable-adjusted relations of serum Mg and HP in OA patients (n = 962)

|                                  | Quintiles of serum Mg |                   |                   |                   |                   | <i>P</i> for trend |
|----------------------------------|-----------------------|-------------------|-------------------|-------------------|-------------------|--------------------|
|                                  | Q1 (lowest)           | Q2                | Q3                | Q4                | Q5 (highest)      |                    |
| Median Mg concentration (mmol/L) | 0.82                  | 0.87              | 0.91              | 0.94              | 0.99              | -                  |
| Participants (n)                 | 200                   | 215               | 190               | 168               | 189               | -                  |
| HP (%)                           | 40.0                  | 33.5              | 37.4              | 42.3              | 40.2              | -                  |
| Model 1*                         | 1.00 (reference)      | 0.71 (0.47, 1.06) | 0.83 (0.54, 1.25) | 1.00 (0.66, 1.54) | 0.89 (0.59, 1.35) | 0.929              |
| <i>P</i> value                   | -                     | 0.095             | 0.368             | 0.987             | 0.582             | -                  |
| Model 2*                         | 1.00 (reference)      | 0.78 (0.51, 1.18) | 0.92 (0.60, 1.41) | 1.16 (0.75, 1.80) | 1.03 (0.67, 1.58) | 0.423              |
| <i>P</i> value                   | -                     | 0.242             | 0.708             | 0.502             | 0.896             | -                  |
| Model 3*                         | 1.00 (reference)      | 0.77 (0.51, 1.17) | 0.90 (0.59, 1.38) | 1.13 (0.73, 1.76) | 0.99 (0.64, 1.53) | 0.524              |
| <i>P</i> value                   | -                     | 0.218             | 0.629             | 0.577             | 0.978             | -                  |

371 Data are adjusted OR (95% CI), unless otherwise indicated; Mg, magnesium; n, number; OA, osteoarthritis; HP, hypertension.

372 \* Model 1 was adjusted for age (continuous data) and gender (male, female); Model 2 was adjusted for age (continuous data), BMI ( $\geq 25$  kg/m<sup>2</sup>,  $< 25$  kg/m<sup>2</sup>), gender  
 373 (male, female), educational level (high school or above, lower than high school), smoking status (yes, no), activity level (continuous data), alcohol drinking status  
 374 (yes, no), diabetes (yes, no), and dyslipidemia (yes, no); Model 3 was adjusted based on model 2, with additional factor of eGFR (continuous data).

375

376 Table 5 Multivariable-adjusted relations of serum Mg and HU in OA patients (n = 962)

|                                  | Quintiles of serum Mg |                   |                   |                   |                   | P for trend |
|----------------------------------|-----------------------|-------------------|-------------------|-------------------|-------------------|-------------|
|                                  | Q1 (lowest)           | Q2                | Q3                | Q4                | Q5 (highest)      |             |
| Median Mg concentration (mmol/L) | 0.82                  | 0.87              | 0.91              | 0.94              | 0.99              | -           |
| Participants (n)                 | 200                   | 215               | 190               | 168               | 189               | -           |
| HU (%)                           | 25.5                  | 19.1              | 13.2              | 18.5              | 14.8              | -           |
| Model 1*                         | 1.00 (reference)      | 0.71 (0.44, 1.14) | 0.44 (0.26, 0.75) | 0.68 (0.41, 1.14) | 0.51 (0.30, 0.85) | 0.008       |
| P value                          | -                     | 0.157             | 0.002             | 0.144             | 0.010             | -           |
| Model 2*                         | 1.00 (reference)      | 0.73 (0.45, 1.19) | 0.42 (0.24, 0.73) | 0.62 (0.37, 1.06) | 0.50 (0.29, 0.86) | 0.007       |
| P value                          | -                     | 0.205             | 0.002             | 0.082             | 0.012             | -           |
| Model 3*                         | 1.00 (reference)      | 0.67 (0.41, 1.11) | 0.36 (0.20, 0.63) | 0.54 (0.31, 0.93) | 0.39 (0.22, 0.68) | <0.001      |
| P value                          | -                     | 0.119             | <0.001            | 0.026             | 0.001             | -           |

377 Data are adjusted OR (95% CI), unless otherwise indicated; Mg, magnesium; n, number; OA, osteoarthritis; HU, hyperuricemia.

378 \* Model 1 was adjusted for age (continuous data) and gender (male, female); Model 2 was adjusted for age (continuous data), BMI ( $\geq 25$  kg/m<sup>2</sup>,  $< 25$  kg/m<sup>2</sup>), gender  
379 (male, female), educational level (high school or above, lower than high school), smoking status (yes, no), activity level (continuous data), alcohol drinking status  
380 (yes, no), hypertension (yes, no), diabetes (yes, no), and dyslipidemia (yes, no); Model 3 was adjusted based on model 2, with additional factor of eGFR (continuous  
381 data).

## STROBE Statement—checklist of items that should be included in reports of observational studies

|                           | Item No | Recommendation                                                                                                                                                                                                                                                                                                                                                                                                                                                         | Reported on Page No |
|---------------------------|---------|------------------------------------------------------------------------------------------------------------------------------------------------------------------------------------------------------------------------------------------------------------------------------------------------------------------------------------------------------------------------------------------------------------------------------------------------------------------------|---------------------|
| <b>Title and abstract</b> | 1       | (a) Indicate the study's design with a commonly used term in the title or the abstract                                                                                                                                                                                                                                                                                                                                                                                 | 2                   |
|                           |         | (b) Provide in the abstract an informative and balanced summary of what was done and what was found                                                                                                                                                                                                                                                                                                                                                                    | 2                   |
| <b>Introduction</b>       |         |                                                                                                                                                                                                                                                                                                                                                                                                                                                                        |                     |
| Background/rationale      | 2       | Explain the scientific background and rationale for the investigation being reported                                                                                                                                                                                                                                                                                                                                                                                   | 4                   |
| Objectives                | 3       | State specific objectives, including any prespecified hypotheses                                                                                                                                                                                                                                                                                                                                                                                                       | 4                   |
| <b>Methods</b>            |         |                                                                                                                                                                                                                                                                                                                                                                                                                                                                        |                     |
| Study design              | 4       | Present key elements of study design early in the paper                                                                                                                                                                                                                                                                                                                                                                                                                | 4-5                 |
| Setting                   | 5       | Describe the setting, locations, and relevant dates, including periods of recruitment, exposure, follow-up, and data collection                                                                                                                                                                                                                                                                                                                                        | 4-5                 |
| Participants              | 6       | (a) <i>Cohort study</i> —Give the eligibility criteria, and the sources and methods of selection of participants. Describe methods of follow-up<br><i>Case-control study</i> —Give the eligibility criteria, and the sources and methods of case ascertainment and control selection. Give the rationale for the choice of cases and controls<br><i>Cross-sectional study</i> —Give the eligibility criteria, and the sources and methods of selection of participants | 4-5                 |
|                           |         | (b) <i>Cohort study</i> —For matched studies, give matching criteria and number of exposed and unexposed<br><i>Case-control study</i> —For matched studies, give matching criteria and the number of controls per case                                                                                                                                                                                                                                                 | -                   |
| Variables                 | 7       | Clearly define all outcomes, exposures, predictors, potential confounders, and effect modifiers. Give diagnostic criteria, if applicable                                                                                                                                                                                                                                                                                                                               | 5-6                 |
| Data sources/measurement  | 8*      | For each variable of interest, give sources of data and details of methods of assessment (measurement). Describe comparability of assessment methods if there is more than one group                                                                                                                                                                                                                                                                                   | 5-6                 |
| Bias                      | 9       | Describe any efforts to address potential sources of bias                                                                                                                                                                                                                                                                                                                                                                                                              | 6-7                 |
| Study size                | 10      | Explain how the study size was arrived at                                                                                                                                                                                                                                                                                                                                                                                                                              | 4                   |
| Quantitative variables    | 11      | Explain how quantitative variables were handled in the analyses. If applicable, describe which groupings were chosen and why                                                                                                                                                                                                                                                                                                                                           | 6-7                 |
| Statistical methods       | 12      | (a) Describe all statistical methods, including those used to control for confounding                                                                                                                                                                                                                                                                                                                                                                                  | 6-7                 |
|                           |         | (b) Describe any methods used to examine subgroups and interactions                                                                                                                                                                                                                                                                                                                                                                                                    | -                   |
|                           |         | (c) Explain how missing data were addressed                                                                                                                                                                                                                                                                                                                                                                                                                            | -                   |
|                           |         | (d) <i>Cohort study</i> —If applicable, explain how loss to follow-up was addressed<br><i>Case-control study</i> —If applicable, explain how matching of cases and controls was addressed<br><i>Cross-sectional study</i> —If applicable, describe analytical methods taking account of sampling strategy                                                                                                                                                              | 4                   |
|                           |         | (e) Describe any sensitivity analyses                                                                                                                                                                                                                                                                                                                                                                                                                                  | 5-6                 |

Continued on next page

1  
2  
3  
4  
5  
6  
7  
8  
9  
10  
11  
12  
13  
14  
15  
16  
17  
18  
19  
20  
21  
22  
23  
24  
25  
26  
27  
28  
29  
30  
31  
32  
33  
34  
35  
36  
37  
38  
39  
40  
41  
42  
43  
44  
45  
46  
47  
48  
49  
50  
51  
52  
53  
54  
55  
56  
57  
58  
59  
60**Results**

|                  |     |                                                                                                                                                                                                              |     |
|------------------|-----|--------------------------------------------------------------------------------------------------------------------------------------------------------------------------------------------------------------|-----|
| Participants     | 13* | (a) Report numbers of individuals at each stage of study—eg numbers potentially eligible, examined for eligibility, confirmed eligible, included in the study, completing follow-up, and analysed            | 4   |
|                  |     | (b) Give reasons for non-participation at each stage                                                                                                                                                         | 4   |
|                  |     | (c) Consider use of a flow diagram                                                                                                                                                                           | -   |
| Descriptive data | 14* | (a) Give characteristics of study participants (eg demographic, clinical, social) and information on exposures and potential confounders                                                                     | 8   |
|                  |     | (b) Indicate number of participants with missing data for each variable of interest                                                                                                                          | -   |
|                  |     | (c) <i>Cohort study</i> —Summarise follow-up time (eg, average and total amount)                                                                                                                             | -   |
| Outcome data     | 15* | <i>Cohort study</i> —Report numbers of outcome events or summary measures over time                                                                                                                          | -   |
|                  |     | <i>Case-control study</i> —Report numbers in each exposure category, or summary measures of exposure                                                                                                         | -   |
|                  |     | <i>Cross-sectional study</i> —Report numbers of outcome events or summary measures                                                                                                                           | 8-9 |
| Main results     | 16  | (a) Give unadjusted estimates and, if applicable, confounder-adjusted estimates and their precision (eg, 95% confidence interval). Make clear which confounders were adjusted for and why they were included | 8-9 |
|                  |     | (b) Report category boundaries when continuous variables were categorized                                                                                                                                    | 8-9 |
|                  |     | (c) If relevant, consider translating estimates of relative risk into absolute risk for a meaningful time period                                                                                             | -   |
| Other analyses   | 17  | Report other analyses done—eg analyses of subgroups and interactions, and sensitivity analyses                                                                                                               | 8-9 |

**Discussion**

|                  |    |                                                                                                                                                                            |       |
|------------------|----|----------------------------------------------------------------------------------------------------------------------------------------------------------------------------|-------|
| Key results      | 18 | Summarise key results with reference to study objectives                                                                                                                   | 9-10  |
| Limitations      | 19 | Discuss limitations of the study, taking into account sources of potential bias or imprecision. Discuss both direction and magnitude of any potential bias                 | 11-12 |
| Interpretation   | 20 | Give a cautious overall interpretation of results considering objectives, limitations, multiplicity of analyses, results from similar studies, and other relevant evidence | 9-10  |
| Generalisability | 21 | Discuss the generalisability (external validity) of the study results                                                                                                      | 11-12 |

**Other information**

|         |    |                                                                                                                                                               |    |
|---------|----|---------------------------------------------------------------------------------------------------------------------------------------------------------------|----|
| Funding | 22 | Give the source of funding and the role of the funders for the present study and, if applicable, for the original study on which the present article is based | 13 |
|---------|----|---------------------------------------------------------------------------------------------------------------------------------------------------------------|----|

\*Give information separately for cases and controls in case-control studies and, if applicable, for exposed and unexposed groups in cohort and cross-sectional studies.

**Note:** An Explanation and Elaboration article discusses each checklist item and gives methodological background and published examples of transparent reporting. The STROBE checklist is best used in conjunction with this article (freely available on the Web sites of PLoS Medicine at <http://www.plosmedicine.org/>, Annals of Internal Medicine at <http://www.annals.org/>, and Epidemiology at <http://www.epidem.com/>). Information on the STROBE Initiative is available at [www.strobe-statement.org](http://www.strobe-statement.org).

# BMJ Open

## Association between Serum Magnesium Concentration with Metabolic Syndrome, Diabetes, Hypertension and Hyperuricemia in Knee Osteoarthritis

|                                 |                                                                                                                                                                                                                                                                                                                                                                                                                                                                                                                                                                                                                                                                                                                                                                                                                                                                               |
|---------------------------------|-------------------------------------------------------------------------------------------------------------------------------------------------------------------------------------------------------------------------------------------------------------------------------------------------------------------------------------------------------------------------------------------------------------------------------------------------------------------------------------------------------------------------------------------------------------------------------------------------------------------------------------------------------------------------------------------------------------------------------------------------------------------------------------------------------------------------------------------------------------------------------|
| Journal:                        | <i>BMJ Open</i>                                                                                                                                                                                                                                                                                                                                                                                                                                                                                                                                                                                                                                                                                                                                                                                                                                                               |
| Manuscript ID                   | bmjopen-2017-019159.R2                                                                                                                                                                                                                                                                                                                                                                                                                                                                                                                                                                                                                                                                                                                                                                                                                                                        |
| Article Type:                   | Research                                                                                                                                                                                                                                                                                                                                                                                                                                                                                                                                                                                                                                                                                                                                                                                                                                                                      |
| Date Submitted by the Author:   | 27-Apr-2018                                                                                                                                                                                                                                                                                                                                                                                                                                                                                                                                                                                                                                                                                                                                                                                                                                                                   |
| Complete List of Authors:       | Wang, Yi-lun; Xiangya Hospital Central South University, Orthopaedics<br>Wei, Jie; Xiangya Hospital Central South University, Health Management Center<br>Zeng, Chao; Xiangya Hospital Central South University, Orthopaedics<br>Yang, Tuo; Xiangya Hospital Central South University, Orthopaedics<br>Li, Hui; Xiangya Hospital Central South University, Orthopaedics<br>Cui, Yang; Xiangya Hospital Central South University, International Medical Center<br>Xie, Dong-xing; Xiangya Hospital, Central South University, Orthopaedics<br>Xu, Bei; Xiangya Hospital Central South University, Orthopaedics<br>Liu, Zhi-chen; Xiangya Hospital Central South University, Orthopaedics<br>Li, Jia-tian; Xiangya Hospital Central South University, Orthopaedics<br>Jiang, Shi-de; Xiangya Hospital Central South University<br>Lei, Guanghua; Xiangya Hospital, Orthopaedics |
| <b>Primary Subject Heading</b>: | Rheumatology                                                                                                                                                                                                                                                                                                                                                                                                                                                                                                                                                                                                                                                                                                                                                                                                                                                                  |
| Secondary Subject Heading:      | Rheumatology, Public health, Epidemiology                                                                                                                                                                                                                                                                                                                                                                                                                                                                                                                                                                                                                                                                                                                                                                                                                                     |
| Keywords:                       | osteoarthritis, magnesium, metabolic syndrome, diabetes, Hypertension < CARDIOLOGY, hyperuricemia                                                                                                                                                                                                                                                                                                                                                                                                                                                                                                                                                                                                                                                                                                                                                                             |
|                                 |                                                                                                                                                                                                                                                                                                                                                                                                                                                                                                                                                                                                                                                                                                                                                                                                                                                                               |

SCHOLARONE™  
Manuscripts



1  
2  
3     **1 Association between Serum Magnesium Concentration with Metabolic**  
4     **2 Syndrome, Diabetes, Hypertension and Hyperuricemia in Knee Osteoarthritis**

6  
7     3

8     4 Yi-lun Wang<sup>1</sup>, Jie Wei<sup>2</sup>, Chao Zeng<sup>1</sup>, Tuo Yang<sup>1</sup>, Hui Li<sup>1</sup>, Yang Cui<sup>3</sup>, Dong-xing Xie<sup>1</sup>,  
9     5 Bei Xu<sup>1</sup>, Zhi-chen Liu<sup>1</sup>, Jia-tian Li<sup>1</sup>, Shi-de Jiang<sup>1</sup>, Guang-hua Lei<sup>1\*</sup>

11  
12     6

13  
14     7 <sup>1</sup>Department of Orthopaedics, Xiangya Hospital, Central South University, Changsha,  
15     8 Hunan Province, China, 410008;

16  
17     9 <sup>2</sup>Health Management Center, Xiangya Hospital, Central South University, Changsha,  
18     10 Hunan Province, China. 410008;

19  
20     11 <sup>3</sup>International Medical Center, Xiangya Hospital, Central South University, Changsha,  
21     12 Hunan Province, China. 410008;

22  
23     13

24  
25     14 \*Correspondence to: Guang-hua Lei, MD, PhD, Department of Orthopaedics,  
26     15 Xiangya Hospital, Central South University, #87 Xiangya Road, Changsha, Hunan,  
27     16 China, 410008. E-mail: lei\_guanghua@csu.edu.cn. Tel. 0731-84327326

28  
29  
30  
31  
32  
33  
34  
35  
36  
37  
38  
39  
40  
41  
42  
43  
44  
45  
46  
47  
48  
49  
50  
51  
52  
53  
54  
55  
56  
57  
58  
59  
60

1  
2  
3 **Abstract**  
4

5 **Objectives:** To examine the associations between serum magnesium (Mg)  
6  
7 concentration with the prevalence of metabolic syndrome (MetS), diabetes mellitus  
8  
9 (DM), hypertension (HP) and hyperuricemia (HU) in radiographic knee osteoarthritis  
10  
11 (OA) patients.

12 **Methods:** The present study was conducted at the Health Management Center of  
13  
14 Xiangya Hospital. Radiographic OA was evaluated for patients aged over 40 years  
15  
16 with basic characteristics and blood biochemical assessment. Serum Mg concentration  
17  
18 was measured using the chemiluminescence method. MetS, DM, HP and HU were  
19  
20 diagnosed based on standard protocols. The associations between serum Mg  
21  
22 concentration with MetS, DM, HP and HU were evaluated by conducting  
23  
24 multivariable adjusted logistic regression.

25 **Results:** A total of 962 radiographic knee OA patients were included. Compared with  
26  
27 the lowest quintile, the multivariable-adjusted odds ratios (ORs) and related 95%  
28  
29 confidence intervals (95%CI) of DM were 0.40 (95%CI 0.23-0.70, P=0.001), 0.33  
30  
31 (95%CI 0.18-0.60, P<0.001), 0.27 (95%CI 0.14-0.52, P<0.001) and 0.22 (95%CI  
32  
33 0.11-0.44, P<0.001) in the second, third, fourth and highest quintiles of serum Mg,  
34  
35 respectively (P for trend <0.001); the multivariable-adjusted ORs of HU were 0.33  
36  
37 (95%CI 0.19-0.59, P<0.001), 0.52 (95%CI 0.30-0.91, P=0.022) and 0.39 (95%CI  
38  
39 0.22-0.70, P=0.001) in the third, fourth and highest quintiles of serum Mg  
40  
41 respectively (P for trend <0.001); and the multivariable-adjusted ORs of MetS were  
42  
43 0.59 (95%CI 0.36-0.94, P=0.027) in the second and 0.56 (95%CI 0.34-0.93, P=0.024)  
44  
45 in the highest quintiles of serum Mg (P for trend =0.067). There was no significant  
46  
47 association between serum Mg and HP in OA patients.

48 **Conclusions:** The serum Mg concentration was inversely associated with the  
49  
50 prevalence of MetS, DM and HU in radiographic knee OA patients.

51 **Level of Evidence:** Level III, cross-sectional study.

52 **Key words:** osteoarthritis, magnesium, metabolic syndrome, diabetes, hypertension,  
53  
54 hyperuricemia  
55

56  
57  
58  
59  
60

1  
2  
3 48 **Strengths and limitations of this study**  
4

- 5 49 1. This is the first study examining the associations between serum magnesium (Mg)  
6  
7 50 and the prevalence of metabolic syndrome, diabetes mellitus, hypertension and  
8  
9 51 hyperuricemia in radiographic knee osteoarthritis patients.  
10  
11 52 2. The multivariable logistical regression models in this study were adjusted for a  
12  
13 53 considerable number of potential confounding factors, which greatly improved the  
14  
15 54 reliability of the results.  
16  
17 55 3. The kidney is the key organ in maintaining Mg homeostasis. This study conducted  
18  
19 56 a sensitivity analysis by adding estimated glomerular filtration rate into the  
20  
21 57 multivariable logistic regression models, and the reverse associations remained  
22  
23 58 significant.  
24  
25 59 4. This study adopted cross-sectional design which precluded causal correlations.  
26  
27 60 5. Serum Mg concentration was adopted as the indicator of body Mg content in this  
28  
29 61 study which may not be the best indicator of body status.  
30  
31  
32  
33  
34  
35  
36  
37  
38  
39  
40  
41  
42  
43  
44  
45  
46  
47  
48  
49  
50  
51  
52  
53  
54  
55  
56  
57  
58  
59  
60  
62

## 63 Introduction

64 The association between osteoarthritis (OA) and metabolic diseases, especially  
65 metabolic syndrome (MetS)<sup>1 2</sup> and diabetes mellitus (DM),<sup>3-5</sup> has drawn increasing  
66 attention in the past few years. OA includes three specific phenotypes: metabolic OA,  
67 age-related OA and injury-related OA.<sup>6</sup> A large number of studies have indicated that  
68 the prevalence of MetS,<sup>7-9</sup> DM<sup>10-18</sup> and hypertension (HP)<sup>7 9-13 19 20</sup> is either higher in  
69 OA patients or associated with OA. In addition, some other studies reported that  
70 MetS,<sup>21 22</sup> DM<sup>23 24</sup> and HP<sup>21 22</sup> are risk factors of OA progression. Thus, it appears  
71 necessary to pay more attention and adopt appropriate measures to reduce the high  
72 prevalence of metabolic diseases in OA patients, which also seems to be beneficial in  
73 delaying OA progression.

74 Serum magnesium (Mg), one of the most important micronutrients for human  
75 health, has been reported to be negatively associated with MetS,<sup>25-29</sup> DM<sup>30-38</sup> and HP<sup>30</sup>  
76 <sup>39-41</sup> by lots of studies. Meanwhile, our previous study showed an inverse association  
77 between serum Mg and hyperuricemia (HU).<sup>42</sup> However, to the best knowledge of the  
78 authors, there is not yet a study examining the association between the serum Mg  
79 concentration and the aforementioned metabolic diseases (MetS, DM, HP and HU) in  
80 OA patients. On the other hand, we have previously shown that the serum Mg  
81 concentration may be inversely associated with radiographic knee OA.<sup>43</sup> Therefore,  
82 we speculate that the prevalence of MetS, DM, HP and HU in OA patients may be  
83 reduced by elevating the level of serum Mg, which can in turn delay OA progression.  
84 Thus, the objective of the present study was to examine the associations between the  
85 serum Mg concentration with the prevalence of MetS, DM, HP and HU in  
86 radiographic knee OA patients. It was hypothesized that serum Mg concentration was  
87 inversely associated with these diseases.

## 89 Methods

### 90 Study population

91 The present study was conducted at the Health Management Center of Xiangya  
92 Hospital between October 2013 and November 2014. The study design has been

1  
2  
3 93 published previously.<sup>42-46</sup> The protocol has been reviewed and approved by the Ethics  
4  
5 94 Committee of Xiangya Hospital, Central South University (reference numbers:  
6  
7 95 201312459), and the methods were developed in “accordance” with the approved  
8  
9 96 guidelines. Informed consent has been obtained from all participants. Registered  
10  
11 97 nurses were engaged to interview all participants during the examination using a  
12  
13 98 standard questionnaire, with the purpose to collect information on demographic  
14  
15 99 characteristics and health-related habits. Participants were selected based on the  
16  
17 100 following inclusion criteria: 1) 40 years old or above; 2) undergoing weight-bearing  
18  
19 101 bilateral anteroposterior radiography of the knee, and diagnosed with knee OA  
20  
21 102 according to the Kellgren-Lawrence (K-L) radiographic atlas (knee joint was graded  
22  
23 103 K-L 2 or above); 3) availability of all basic characteristics, including age, gender,  
24  
25 104 body mass index (BMI) and blood pressure; 4) availability of biochemical test results,  
26  
27 105 including serum Mg concentration; 5) availability of information related to the living  
28  
29 106 habits, including education background, activity level, smoking, drinking and  
30  
31 107 medication status. Initially, the present cross-sectional study retrieved 1820  
32  
33 108 radiographic knee OA patients aged over 40 years who exhibited sound basic  
34  
35 109 characteristics and required blood biochemical assessment (including serum Mg  
36  
37 110 concentration). Among them, 962 patients offered demographic characteristics and  
38  
39 111 health-related habits and were finally included in this study.

112

### 113 **Blood biochemistry**

114 All blood samples were drawn after a 12-hour overnight fast and were kept at 4°C  
115 until analysis. Blood tests were undertaken using the Beckman Coulter AU 5800  
116 (Beckman Coulter Inc., Brea, CA, USA). The inter- and intra-assay coefficients of  
117 variation were tested at both low concentrations (2.5 mmol/L for glucose, 118 µmol/L  
118 for uric acid and 0.60 mmol/L for serum Mg) and high concentrations (6.7 mmol/L for  
119 glucose, 472 µmol/L for uric acid and 1.00 mmol/L for serum Mg) of standard human  
120 samples. The intra-assay coefficients of variation were 0.98% (2.5 mmol/L) and 1.72%  
121 (6.7 mmol/L) for glucose, 1.39% (118 µmol/L) and 0.41% (472 µmol/L) for uric acid,  
122 and 1.86% (0.60 mmol/L) and 1.65% (1.00 mmol/L) for serum Mg respectively. The

1  
2  
3 123 inter-assay coefficients of variation were 2.45% (2.5 mmol/L) and 1.46% (6.7 mmol/L)  
4  
5 124 for glucose, 1.40% (118  $\mu\text{mol/L}$ ) and 1.23% (472  $\mu\text{mol/L}$ ) for uric acid, and 1.87%  
6  
7 125 (0.60 mmol/L) and 1.70% (1.00 mmol/L) for serum Mg respectively.  
8  
9 126

### 10 127 **Assessment of other exposures**

12 128 Blood pressure was measured by an electronic sphygmomanometer. The weight and  
13  
14 129 height of each subjects was measured respectively to calculate the BMI. Information  
15  
16 130 on the average frequency of physical activity (never, one to two times per week, three  
17  
18 131 to four times per week, five times and above per week) and average duration of  
19  
20 132 physical activity (less than half an hour, half an hour to one hour, one to two hours,  
21  
22 133 more than two hours) was collected through survey questionnaire. The smoking,  
23  
24 134 alcohol drinking and medication status were collected during the face-to-face  
25  
26 135 interview.  
27  
28 136

### 29 137 **Assessment of MetS, DM, HP and HU**

30 138 MetS was diagnosed based on the Chinese Diabetes Society (CDS) criteria,<sup>47-49</sup> which  
31  
32 139 requires meeting at least 3 of the following 4 items: (1) BMI  $\geq 25$  kg/m<sup>2</sup>; (2) Fasting  
33  
34 140 plasma glucose (FPG)  $\geq 6.1$  mmol/L, or diagnosed DM; (3) Systolic blood pressure  
35  
36 141 (BP)  $\geq 140$  mmHg or diastolic BP  $\geq 90$  mmHg, or treatment of previously diagnosed  
37  
38 142 HP; (4) Triglycerides  $\geq 1.7$  mmol/L and/or HDL-cholesterol  $< 0.9$  mmol/L in male or  
39  
40 143  $< 1.0$  mmol/L in female, or treatment for this lipid abnormality. Subjects with the  
41  
42 144 fasting glucose  $\geq 7.0$  mmol/L or currently undergoing drug treatment for blood glucose  
43  
44 145 control were regarded as DM patients, and subjects with the systolic blood pressure  
45  
46 146  $\geq 140$  mm Hg or diastolic blood pressure  $\geq 90$  mm Hg or currently undertaking  
47  
48 147 antihypertensive medication were regarded as HP patients. HU was defined as uric  
49  
50 148 acid  $\geq 416$   $\mu\text{mol/L}$  for male and  $\geq 360$   $\mu\text{mol/L}$  for female or currently undergoing drug  
51  
52 149 treatment for uric acid control.  
53  
54 150

### 54 151 **Statistical analysis**

56 152 The continuous data are expressed as mean with standard deviation, and the category

1  
2  
3 153 data are expressed in percentage. Differences in continuous data were evaluated by  
4  
5 154 one-way classification ANOVA (normally distributed data) or Kruskal-Wallis H test  
6  
7 155 (non-normally distributed data), while differences in category data were assessed by  
8  
9 156 the  $\chi^2$  test. The serum Mg was classified into five categories based on the quintile  
10  
11 157 distribution:  $\leq 0.85$ , 0.86-0.89, 0.90-0.92, 0.93-0.96 and  $\geq 0.97$  mmol/L. The  
12  
13 158 prevalence of MetS, DM, HP and HU in each quintile of serum Mg in OA patients  
14  
15 159 were assessed by scatter plots.

16 160 Logistic regression was conducted to calculate the odds ratios (ORs) with 95%  
17  
18 161 confidence intervals (95%CI) for the associations between serum Mg and MetS, DM,  
19  
20 162 HP and HU. Specifically, model 1 was adjusted by covariates of age (continuous data)  
21  
22 163 and gender (male, female). Then, model 2 was adjusted by additional covariates of  
23  
24 164 BMI (continuous data), educational level (high school or above, lower than high  
25  
26 165 school), smoking status (yes, no), activity level (continuous data), alcohol drinking  
27  
28 166 status (yes, no), HP (yes, no), DM (yes, no), and dyslipidemia (yes, no) on the basis of  
29  
30 167 model 1. Dyslipidemia was defined as triglycerides  $\geq 1.7$  mmol/L and/or  
31  
32 168 HDL-cholesterol  $< 0.9$  mmol/L in male or  $< 1.0$  mmol/L in female, or treatment for this  
33  
34 169 lipid abnormality. Notably, the selection of covariates in model 2 varied slightly for  
35  
36 170 examining different associations (between serum Mg and MetS, DM, HP or HU). For  
37  
38 171 example, BMI, HP and dyslipidemia were adjusted for the association between serum  
39  
40 172 Mg and DM, but not for the association between serum Mg and MetS, simply because  
41  
42 173 MetS was diagnosed based on BMI, HP and dyslipidemia status. Model 3 was  
43  
44 174 established based on model 2, with adjustment of an additional covariate, estimated  
45  
46 175 glomerular filtration rate (eGFR). eGFR (continuous data) was calculated from the  
47  
48 176 Chronic Kidney Disease Epidemiology Collaboration equation.<sup>50</sup> All covariates in the  
49  
50 177 present study were chosen referring to some of the previous similar studies.<sup>27 33 51 52</sup>  
51  
52 178 Tests for linear trends were conducted based on logistic regression using a median  
53  
54 179 variable of Mg concentration in each category.  
55  
56 180 Scatter plots were plotted using R 3.4.4.<sup>53</sup> Other data analyses were performed using  
57  
58 181 SPSS 17.0;  $P \leq 0.05$  was considered to be statistically significant. All tests were two  
59  
60 182 tailed.



1  
2  
3 1834  
5 184 **Patient and public involvement**6  
7 185 No patients were involved in setting the research question or the outcome measures,  
8  
9 186 nor were they involved in the design or implementation of the study. There are no  
10  
11 187 plans to disseminate the results of the research to study participants

12 188

13  
14 189 **Results**15  
16 190 A total of 962 subjects (377 females, accounting for 39.2%) were included in the  
17  
18 191 present cross-sectional study. The characteristics of the study population according to  
19  
20 192 quintiles of serum Mg were presented in Table 1. The mean age of the subjects was  
21  
22 193 54.9±7.6 years old. The overall prevalence of MetS, DM, HP and HU in OA patients  
23  
24 194 were 21.4%, 12.0%, 38.5% and 18.3% respectively. Significant differences were  
25  
26 195 observed across the quintiles of serum Mg for fasting glucose, as well as the  
27  
28 196 prevalence of DM and HU.29  
30 197 The prevalence of MetS in each quintile of serum Mg in OA patients was shown  
31  
32 198 in Figure 1 (A). The outcomes of multivariable adjusted associations between MetS  
33  
34 199 and serum Mg concentration were shown in Table 2. Compared with the lowest  
35  
36 200 quintile, the age-gender adjusted ORs (Model 1) suggested significant decreased  
37  
38 201 prevalence of MetS in the second (OR=0.61, 95%CI 0.38-0.97, P=0.038) and the  
39  
40 202 highest (OR=0.59, 95%CI 0.36-0.96, P=0.035) quintiles of serum Mg (P for trend  
41  
42 203 =0.090); the multivariable adjusted ORs (Model 2) also suggested significant  
43  
44 204 decreased prevalence of MetS in the second (OR=0.60, 95%CI 0.37-0.96, P=0.035)  
45  
46 205 and the highest (OR=0.61, 95%CI 0.37-0.99, P=0.047) quintiles, and the P for trend  
47  
48 206 was 0.120. The sensitivity analysis, by adding eGFR into model 2, also reached  
49  
50 207 similar results - significant lower prevalence of MetS in the second (OR=0.59, 95%CI  
51  
52 208 0.36-0.94, P=0.027) and the highest quintiles (OR=0.56, 95%CI 0.34-0.93, P=0.024)  
53  
54 209 compared with the reference quintile of serum Mg, and the P for trend was 0.067.55  
56 210 Figure 1 (B) showed the prevalence of DM in each category of serum Mg in OA  
57  
58 211 patients. Table 3 illustrated the multivariable adjusted relations between serum Mg  
59  
60 212 and DM in OA patients. Both the age-gender adjusted OR values (Model 1) and the



1  
2  
3 213 multivariable adjusted OR values (Model 2) suggested a strong inverse association  
4  
5 214 between serum Mg and DM. The age-gender adjusted ORs for the prevalence of DM  
6  
7 215 were 0.38 (95%CI 0.22-0.66, P=0.001), 0.34 (95%CI 0.19-0.61, P<0.001), 0.29  
8  
9 216 (95%CI 0.15-0.55, P<0.001), and 0.20 (95%CI 0.10-0.40, P<0.001) in the second,  
10  
11 217 third, fourth and fifth quintiles of serum Mg respectively, and the P for trend was  
12  
13 218 <0.001. The multivariable adjusted ORs for the prevalence of DM were 0.40 (95%CI  
14  
15 219 0.23-0.70, P=0.001), 0.32 (95%CI 0.18-0.59, P<0.001), 0.26 (95%CI 0.13-0.50,  
16  
17 220 P<0.001), and 0.21 (95%CI 0.11-0.42, P<0.001) in the second, third, fourth and fifth  
18  
19 221 quintiles of serum Mg respectively, and the P for trend was <0.001. The sensitivity  
20  
21 222 analysis, by adding eGFR into model 2, showed similar results - significant lower  
22  
23 223 prevalence of DM in the second (OR=0.40, 95%CI 0.23-0.70, P=0.001), third  
24  
25 224 (OR=0.33, 95%CI 0.18-0.60, P<0.001), fourth (OR=0.27, 95%CI 0.14-0.52, P<0.001),  
26  
27 225 and highest quintiles (OR=0.22, 95%CI 0.11-0.44, P<0.001) compared with the  
28  
29 226 reference quintile of serum Mg, and the P for trend was <0.001.

30  
31 227 The prevalence of HP in each quintile of serum Mg in OA patients was depicted  
32  
33 228 in Figure 1 (C). The multivariable-adjusted relations between serum Mg and HP in  
34  
35 229 OA patients were illustrated in Table 4. According to both the age-gender adjusted  
36  
37 230 ORs (Model 1) and the multivariable adjusted ORs (Model 2), there was no  
38  
39 231 significant association between serum Mg and HP, and the P for trend were 0.929 and  
40  
41 232 0.377, respectively. The sensitivity analysis, by adding eGFR into model 2, reached  
42  
43 233 the same results.

44  
45 234 The prevalence of HU in each category of serum Mg in OA patients was shown  
46  
47 235 in Figure 1 (D). The multivariable-adjusted relations between serum Mg and HU in  
48  
49 236 OA patients were illustrated in Table 5. Both the age-gender adjusted OR values  
50  
51 237 (Model 1) and the multivariable adjusted OR values (Model 2) suggested significant  
52  
53 238 decreased prevalence of HU in the third quintile (age-gender adjusted OR=0.44,  
54  
55 239 95%CI 0.26-0.75, P=0.002; multivariable adjusted OR=0.38, 95%CI 0.22-0.67,  
56  
57 240 P=0.001) and fifth quintile (age-gender adjusted OR=0.51, 95%CI 0.30-0.85, P=0.010;  
58  
59 241 multivariable adjusted OR=0.50, 95%CI 0.29-0.87, P=0.013) compared with the  
60  
242 lowest quintile of serum Mg, and the P for trend were 0.008 and 0.006, respectively.

1  
2  
3 243 The sensitivity analysis, by adding eGFR into model 2, showed similar outcomes -  
4  
5 244 significant lower prevalence of HU in the third (OR=0.33, 0.19-0.59, P<0.001), fourth  
6  
7 245 (OR=0.52, 95%CI 0.30-0.91, P=0.022), and highest quintiles (OR=0.39, 95%CI  
8  
9 246 0.22-0.70, P=0.001) compared with the reference quintile of serum Mg, and the P for  
10  
11 247 trend was <0.001.

12  
13 248

## 14 249 **Discussion**

15  
16 250 The results of this study suggested that the serum Mg concentration was negatively  
17  
18 251 associated with the prevalence of MetS, DM and HU in subjects with radiographic  
19  
20 252 knee OA. In order to control potential confounders, several covariates including  
21  
22 253 characteristics, living habits and underlying diseases were selected, and even the  
23  
24 254 eGFR was added into the multivariable logistic regression models to eliminate the  
25  
26 255 influence of renal function on Mg excretion. The reverse associations mentioned  
27  
28 256 above remained significant after adjustments of these confounders. However, the  
29  
30 257 negative association between serum Mg and the prevalence of HP was not observed in  
31  
32 258 radiographic knee OA patients. Moreover, the linear associations were only observed  
33  
34 259 between serum Mg with DM and HU, but not between serum Mg and MetS.

35 260 Mg, the fourth most abundant cation in human body and the second most profuse  
36  
37 261 intracellular cation, is a metallic cofactor for over 300 enzymatic reactions. It appears  
38  
39 262 to play an important role in glucose metabolism and insulin homeostasis, which are  
40  
41 263 both highly correlated with metabolic diseases, especially MetS and DM. The  
42  
43 264 mechanisms involved in Mg deficiency in patients with MetS, DM and HU are  
44  
45 265 probably multifactorial. The most important factor may be insulin resistance, as Mg is  
46  
47 266 essential for insulin action and is a critical cofactor for several enzymes in  
48  
49 267 carbohydrate metabolism, which is important for the phosphorylation reactions of  
50  
51 268 tyrosine-kinase in the insulin receptor.<sup>31 54-58</sup> Of course, it is necessary to highlight the  
52  
53 269 fact that insulin can also induce Mg excretion<sup>59</sup> and produce a significant decline of  
54  
55 270 plasma Mg through ion exchange.<sup>60</sup> Thus, there seems to be a vicious circle between  
56  
57 271 Mg deficiency and insulin resistance.

58  
59 272 Other potential mechanisms include glucose transportation,<sup>57</sup> oxidative stress<sup>57</sup>

1  
2  
3 273 and inflammatory cytokines,<sup>61-63</sup> and cellular calcium homeostasis.<sup>55</sup> Mg is an  
4 274 essential cofactor of the high-energy phosphate-bound enzymatic pathways involved  
5 275 in the modulation of glucose transport across cell membranes.<sup>57</sup> It also plays a role in  
6 276 the mechanisms of cellular antioxidant defense.<sup>64</sup> The oxidative stress, defined as a  
7 277 persistent imbalance between the excessive production of reactive oxygen species  
8 278 and/or defects in antioxidant defense, has been implicated in the pathogenesis of  
9 279 diabetic complications.<sup>57</sup> Moreover, low serum Mg levels are strongly related to  
10 280 elevated serum concentrations of both tumor necrosis factor alpha and C-reactive  
11 281 protein (CRP),<sup>65</sup> suggesting that Mg deficiency may contribute to the development of  
12 282 low-grade chronic inflammation syndrome and the development of glucose metabolic  
13 283 disorders through the former pathway. In addition, lower Mg concentration can  
14 284 enhance calcium-mediated vasoconstriction, blunt cardiac and smooth muscle  
15 285 relaxation, and thus contribute to BP elevation.<sup>55</sup> However, the decreased serum  
16 286 calcium concentration in radiographic knee OA patients may weaken the association  
17 287 between Mg and HP.<sup>66</sup>

18 288 MetS<sup>21 22</sup> and DM<sup>4 23 24</sup> were reported to be the risk factors of OA progression.  
19 289 Moreover, serum Mg level has been proved to be significantly associated with the  
20 290 CRP concentration,<sup>27 67-69</sup> and higher CRP might serve as a prediction factor for OA  
21 291 progression.<sup>70 71</sup> Thus, OA progression may be delayed by elevating the serum Mg  
22 292 level through reducing the prevalence of MetS and DM and decreasing the level of  
23 293 CRP. Above all, the present study indicated that the elevation of serum Mg level has  
24 294 the potential to reduce the prevalence of MetS, DM and HU in knee OA patients and  
25 295 thereby may delay the progression of knee OA. However, the specific mechanism  
26 296 needs to be further explored.

27 297 The present study has several strengths. Firstly, this is the first study examining  
28 298 the associations between serum Mg and the prevalence of MetS, DM, HP and HU in  
29 299 radiographic knee OA patients. The results of this study will provide a new insight  
30 300 into the treatment of knee OA. Secondly, the multivariable logistical regression  
31 301 models were adjusted for a considerable number of potential confounding factors,  
32 302 which greatly improved the reliability of the results. Thirdly, the kidney is the key

1  
2  
3 303 organ in maintaining Mg homeostasis. This study conducted a sensitivity analysis by  
4 304 adding eGFR into multivariable logistic regression models which showed that the  
5  
6 305 reverse associations remained significant.

7  
8 306 Limitations of the present study should also be admitted. The cross-sectional  
9  
10 307 design precludes causal correlations, so further prospective studies and intervention  
11  
12 308 trials should be undertaken to establish a causal association between serum Mg with  
13  
14 309 the prevalence of MetS, DM, HP and HU in radiographic knee OA patients. Since no  
15  
16 310 previous research investigated such associations in knee OA patients, the value of this  
17  
18 311 study should not be blotted out by the cross-sectional nature. Another limitation of  
19  
20 312 this study lies in the relatively small sample size, and thus, extensive high-quality  
21  
22 313 researches based on a larger sample are needed. Moreover, the dietary intake of Mg in  
23  
24 314 relation to the prevalence of MetS, DM, HP and HU were not assessed in the present  
25  
26 315 study. Last but not the least, it is important to highlight that Mg is an intracellular ion;  
27  
28 316 therefore, the serum Mg concentration must be considered as a poor indicator of body  
29  
30 317 Mg content,<sup>72</sup> even though it has been used in many studies. However, blood Mg level  
31  
32 318 is the second best indicator of body status.<sup>73</sup>

33  
34 319

### 35 320 **Conclusions**

36 321 The present study concluded that the serum Mg concentration was inversely  
37  
38 322 associated with the prevalence of MetS, DM and HU in radiographic knee OA  
39  
40 323 patients.

41  
42 324

**Contributors**

All authors had full access to the data in the study and take responsibility for the integrity of the data and the accuracy of the data analysis. GHL, YLW and JW conceived the study. GHL, YLW and JW were responsible for conception and design of the study and drafted the manuscript. CZ, TY, HL, YC and DXX contributed to data collection. WJ contributed to preparation and data analysis. BX, ZCL, JTL, and SDJ contributed to study retrieval. GHL and YLW contributed to revision of the manuscript. All the authors contributed to the interpretation of the data and critically reviewed the manuscript for publication.

334

**Funding**

This work was supported by the Innovation Foundation of the Central South University for Postgraduate (2018zzts045), the Postdoctoral Science Foundation of Central South University (182130), the National Natural Science Foundation of China (No. 81201420, 81272034, 81472130, 81501923), the Provincial Science Foundation of Hunan (No. 14JJ3032), the Scientific Research Project of the Development and Reform Commission of Hunan Province ([2013]1199), the Scientific Research Project of Science and Technology Office of Hunan Province (2013SK2018), the Doctoral Scientific Fund Project of the Ministry of Education of China (20120162110036).

344

**Competing interests**

The authors declare that they have no conflict of interest.

347

**Ethics approval**

The protocol of this study was reviewed and approved by the Ethics Committee at Xiangya Hospital.

351

**Data sharing statement**

The datasets during the current study available from the corresponding author on reasonable request.

355

356 **REFERENCE**

- 357 1 Zhuo Q, Yang W, Chen J, *et al.* Metabolic syndrome meets osteoarthritis. *Nat*  
358 *Rev Rheumatol* 2012;8(12):729-37.
- 359 2 Katz JD, Agrawal S, Velasquez M. Getting to the heart of the matter:  
360 osteoarthritis takes its place as part of the metabolic syndrome. *Curr Opin*  
361 *Rheumatol* 2010;22(5):512-9.
- 362 3 Berenbaum F. Diabetes-induced osteoarthritis: from a new paradigm to a new  
363 phenotype. *Ann Rheum Dis* 2011;70(8):1354-6.
- 364 4 King KB, Rosenthal AK. The adverse effects of diabetes on osteoarthritis: update  
365 on clinical evidence and molecular mechanisms. *Osteoarthritis Cartilage*  
366 2015;23(6):841-50.
- 367 5 Kirkman MS. Osteoarthritis progression: is diabetes a culprit? *Osteoarthritis*  
368 *Cartilage* 2015;23(6):839-40.
- 369 6 Sellam J, Berenbaum F. Is osteoarthritis a metabolic disease? *Joint Bone Spine*  
370 2013;80(6):568-73.
- 371 7 Puenpatom RA, Victor TW. Increased prevalence of metabolic syndrome in  
372 individuals with osteoarthritis: an analysis of NHANES III data. *Postgrad Med*  
373 2009;121(6):9-20.
- 374 8 Shin D. Association between metabolic syndrome, radiographic knee  
375 osteoarthritis, and intensity of knee pain: results of a national survey. *J Clin*  
376 *Endocrinol Metab* 2014;99(9):3177-83.
- 377 9 Calvet J, Orellana C, Larrosa M, *et al.* High prevalence of cardiovascular  
378 co-morbidities in patients with symptomatic knee or hand osteoarthritis. *Scand J*  
379 *Rheumatol* 2015:1-4.
- 380 10 Rahman MM, Kopec JA, Cibere J, *et al.* The relationship between osteoarthritis  
381 and cardiovascular disease in a population health survey: a cross-sectional study.  
382 *BMJ Open* 2013;3(5):e2624.
- 383 11 Inoue R, Ishibashi Y, Tsuda E, *et al.* Medical problems and risk factors of  
384 metabolic syndrome among radiographic knee osteoarthritis patients in the

- 1  
2  
3 385 Japanese general population. *J Orthop Sci* 2011;16(6):704-9.
- 4  
5 386 12 Hart DJ, Doyle DV, Spector TD. Association between metabolic factors and knee  
6  
7 387 osteoarthritis in women: the Chingford Study. *J Rheumatol* 1995;22(6):1118-23.
- 8  
9 388 13 Jungmann PM, Kraus MS, Alizai H, *et al.* Association of metabolic risk factors  
10  
11 389 with cartilage degradation assessed by T2 relaxation time at the knee: data from  
12  
13 390 the osteoarthritis initiative. *Arthritis Care Res (Hoboken)* 2013;65(12):1942-50.
- 14  
15 391 14 Anagnostopoulos I, Zinzaras E, Alexiou I, *et al.* The prevalence of rheumatic  
16  
17 392 diseases in central Greece: a population survey. *BMC Musculoskelet Disord*  
18  
19 393 2010;11:98.
- 20  
21 394 15 Massengale M, Reichmann WM, Losina E, *et al.* The relationship between hand  
22  
23 395 osteoarthritis and serum leptin concentration in participants of the Third National  
24  
25 396 Health and Nutrition Examination Survey. *Arthritis Res Ther* 2012;14(3):R132.
- 26  
27 397 16 Nieves-Plaza M, Castro-Santana LE, Font YM, *et al.* Association of hand or knee  
28  
29 398 osteoarthritis with diabetes mellitus in a population of Hispanics from Puerto  
30  
31 399 Rico. *J Clin Rheumatol* 2013;19(1):1-6.
- 32  
33 400 17 Greiver M, Williamson T, Barber D, *et al.* Prevalence and epidemiology of  
34  
35 401 diabetes in Canadian primary care practices: a report from the Canadian Primary  
36  
37 402 Care Sentinel Surveillance Network. *Can J Diabetes* 2014;38(3):179-85.
- 38  
39 403 18 Rahman MM, Cibere J, Anis AH, *et al.* Risk of Type 2 Diabetes among  
40  
41 404 Osteoarthritis Patients in a Prospective Longitudinal Study. *Int J Rheumatol*  
42  
43 405 2014;2014:620920.
- 44  
45 406 19 Reid JL, Morton DJ, Wingard DL, *et al.* Obesity and other cardiovascular disease  
46  
47 407 risk factors and their association with osteoarthritis in Southern California  
48  
49 408 American Indians, 2002-2006. *Ethn Dis* 2010;20(4):416-22.
- 50  
51 409 20 Birtwhistle R, Morkem R, Peat G, *et al.* Prevalence and management of  
52  
53 410 osteoarthritis in primary care: an epidemiologic cohort study from the Canadian  
54  
55 411 Primary Care Sentinel Surveillance Network. *CMAJ Open* 2015;3(3):E270-5.
- 56  
57 412 21 Yoshimura N, Muraki S, Oka H, *et al.* Accumulation of metabolic risk factors  
58  
59 413 such as overweight, hypertension, dyslipidaemia, and impaired glucose tolerance  
60 414 raises the risk of occurrence and progression of knee osteoarthritis: a 3-year



- 1  
2  
3 415 follow-up of the ROAD study. *Osteoarthritis Cartilage* 2012;20(11):1217-26.  
4  
5 416 22 Monira HS, Wang Y, Cicuttini FM, *et al.* Incidence of total knee and hip  
6  
7 417 replacement for osteoarthritis in relation to the metabolic syndrome and its  
8  
9 418 components: a prospective cohort study. *Semin Arthritis Rheum*  
10  
11 419 2014;43(4):429-36.  
12  
13 420 23 Schett G, Kleyer A, Perricone C, *et al.* Diabetes is an independent predictor for  
14  
15 421 severe osteoarthritis: results from a longitudinal cohort study. *Diabetes Care*  
16  
17 422 2013;36(2):403-9.  
18  
19 423 24 Eymard F, Parsons C, Edwards MH, *et al.* Diabetes is a risk factor for knee  
20  
21 424 osteoarthritis progression. *Osteoarthritis Cartilage* 2015;23(6):851-9.  
22  
23 425 25 Guerrero-Romero F, Rodriguez-Moran M. Low serum magnesium levels and  
24  
25 426 metabolic syndrome. *Acta Diabetol* 2002;39(4):209-13.  
26  
27 427 26 Guerrero-Romero F, Rodriguez-Moran M. Hypomagnesemia, oxidative stress,  
28  
29 428 inflammation, and metabolic syndrome. *Diabetes Metab Res Rev*  
30  
31 429 2006;22(6):471-6.  
32  
33 430 27 Evangelopoulos AA, Vallianou NG, Panagiotakos DB, *et al.* An inverse  
34  
35 431 relationship between cumulating components of the metabolic syndrome and  
36  
37 432 serum magnesium levels. *Nutr Res* 2008;28(10):659-63.  
38  
39 433 28 Hjelmessaeth J, Hofso D, Aasheim ET, *et al.* Parathyroid hormone, but not  
40  
41 434 vitamin D, is associated with the metabolic syndrome in morbidly obese women  
42  
43 435 and men: a cross-sectional study. *Cardiovasc Diabetol* 2009;8:7.  
44  
45 436 29 Lima ML, Cruz T, Rodrigues LE, *et al.* Serum and intracellular magnesium  
46  
47 437 deficiency in patients with metabolic syndrome--evidences for its relation to  
48  
49 438 insulin resistance. *Diabetes Res Clin Pract* 2009;83(2):257-62.  
50  
51 439 30 Ma J, Folsom AR, Melnick SL, *et al.* Associations of serum and dietary  
52  
53 440 magnesium with cardiovascular disease, hypertension, diabetes, insulin, and  
54  
55 441 carotid arterial wall thickness: the ARIC study. *Atherosclerosis Risk in*  
56  
57 442 *Communities Study. J Clin Epidemiol* 1995;48(7):927-40.  
58  
59 443 31 Kao WH, Folsom AR, Nieto FJ, *et al.* Serum and dietary magnesium and the risk  
60  
444 for type 2 diabetes mellitus: the Atherosclerosis Risk in Communities Study.



- 1  
2  
3 445 *Arch Intern Med* 1999;159(18):2151-9.
- 4  
5 446 32 Wang JL, Shaw NS, Yeh HY, *et al.* Magnesium status and association with  
6  
7 447 diabetes in the Taiwanese elderly. *Asia Pac J Clin Nutr* 2005;14(3):263-9.
- 8  
9 448 33 Chambers EC, Heshka S, Gallagher D, *et al.* Serum magnesium and type-2  
10  
11 449 diabetes in African Americans and Hispanics: a New York cohort. *J Am Coll*  
12  
13 450 *Nutr* 2006;25(6):509-13.
- 14  
15 451 34 Simmons D, Joshi S, Shaw J. Hypomagnesaemia is associated with diabetes: Not  
16  
17 452 pre-diabetes, obesity or the metabolic syndrome. *Diabetes Res Clin Pract*  
18  
19 453 2010;87(2):261-6.
- 20  
21 454 35 Sales CH, Pedrosa LF, Lima JG, *et al.* Influence of magnesium status and  
22  
23 455 magnesium intake on the blood glucose control in patients with type 2 diabetes.  
24  
25 456 *Clin Nutr* 2011;30(3):359-64.
- 26  
27 457 36 Lecube A, Baena-Fustegueras JA, Fort JM, *et al.* Diabetes is the main factor  
28  
29 458 accounting for hypomagnesemia in obese subjects. *PLoS One* 2012;7(1):e30599.
- 30  
31 459 37 Xu J, Xu W, Yao H, *et al.* Associations of serum and urinary magnesium with the  
32  
33 460 pre-diabetes, diabetes and diabetic complications in the Chinese Northeast  
34  
35 461 population. *PLoS One* 2013;8(2):e56750.
- 36  
37 462 38 Yang SJ, Hwang SY, Baik SH, *et al.* Serum magnesium level is associated with  
38  
39 463 type 2 diabetes in women with a history of gestational diabetes mellitus: the  
40  
41 464 Korea National Diabetes Program study. *J Korean Med Sci* 2014;29(1):84-9.
- 42  
43 465 39 Singh RB, Rastogi V, Niaz MA, *et al.* Epidemiological study of magnesium  
44  
45 466 status and risk of hypertension in a rural population of north India. *Magnes Res*  
46  
47 467 1996;9(3):173-81.
- 48  
49 468 40 Peacock JM, Folsom AR, Arnett DK, *et al.* Relationship of serum and dietary  
50  
51 469 magnesium to incident hypertension: the Atherosclerosis Risk in Communities  
52  
53 470 (ARIC) Study. *Ann Epidemiol* 1999;9(3):159-65.
- 54  
55 471 41 Guerrero-Romero F, Rodriguez-Moran M, Hernandez-Ronquillo G, *et al.* Low  
56  
57 472 Serum Magnesium Levels and Its Association with High Blood Pressure in  
58  
59 473 Children. *J Pediatr* 2016;168:93-8.
- 60 474 42 Zeng C, Wang YL, Wei J, *et al.* Association between low serum magnesium

- 1  
2  
3 475 concentration and hyperuricemia. *Magnes Res* 2015;28(2):56-63.
- 4  
5 476 43 Zeng C, Wei J, Li H, *et al.* Relationship between Serum Magnesium  
6  
7 477 Concentration and Radiographic Knee Osteoarthritis. *J Rheumatol*  
8  
9 478 2015;42(7):1231-6.
- 10  
11 479 44 Wei J, Zeng C, Gong QY, *et al.* Associations between Dietary Antioxidant Intake  
12  
13 480 and Metabolic Syndrome. *PLoS One* 2015;10(6):e130876.
- 14  
15 481 45 Xie DX, Xiong YL, Zeng C, *et al.* Association between low dietary zinc and  
16  
17 482 hyperuricaemia in middle-aged and older males in China: a cross-sectional study.  
18  
19 483 *BMJ Open* 2015;5(10):e8637.
- 20  
21 484 46 Wei J, Zeng C, Gong QY, *et al.* The association between dietary selenium intake  
22  
23 485 and diabetes: a cross-sectional study among middle-aged and older adults. *Nutr J*  
24  
25 486 2015;14:18.
- 26  
27 487 47 Expert Panel on Metabolic Syndrome of Chinese Diabetes Society:  
28  
29 488 Recommendations on metabolic syndrome of Chinese Diabetes Society (Chinese).  
30  
31 489 *Chin J Diabetes* 2004;14:156-61.
- 32  
33 490 48 Pang C, Jia L, Hou X, *et al.* The significance of screening for microvascular  
34  
35 491 diseases in Chinese community-based subjects with various metabolic  
36  
37 492 abnormalities. *PLoS One* 2014;9(5):e97928.
- 38  
39 493 49 Zhou H, Guo ZR, Yu LG, *et al.* Evidence on the applicability of the ATPIII, IDF  
40  
41 494 and CDS metabolic syndrome diagnostic criteria to identify CVD and T2DM in  
42  
43 495 the Chinese population from a 6.3-year cohort study in mid-eastern China.  
44  
45 496 *Diabetes Res Clin Pract* 2010;90(3):319-25.
- 46  
47 497 50 Levey AS, Stevens LA, Schmid CH, *et al.* A new equation to estimate glomerular  
48  
49 498 filtration rate. *Ann Intern Med* 2009;150(9):604-12.
- 50  
51 499 51 Joosten MM, Gansevoort RT, Mukamal KJ, *et al.* Urinary magnesium excretion  
52  
53 500 and risk of hypertension: the prevention of renal and vascular end-stage disease  
54  
55 501 study. *Hypertension* 2013;61(6):1161-7.
- 56  
57 502 52 Choi MK, Bae YJ. Association of Magnesium Intake with High Blood Pressure  
58  
59 503 in Korean Adults: Korea National Health and Nutrition Examination Survey  
60  
504 2007-2009. *PLoS One* 2015;10(6):e130405.

- 1  
2  
3 505 53 R Development Core Team. R: A Language and Environment for Statistical  
4 Computing, Vienna, Austria: R Foundation for Statistical Computing. 2016.  
5  
6  
7 507 54 Grundy SM, Cleeman JI, Daniels SR, *et al.* Diagnosis and management of the  
8 metabolic syndrome: an American Heart Association/National Heart, Lung, and  
9 Blood Institute Scientific Statement. *Circulation* 2005;112(17):2735-52.  
10  
11 509  
12 510 55 Barbagallo M, Dominguez LJ, Galioto A, *et al.* Role of magnesium in insulin  
13 action, diabetes and cardio-metabolic syndrome X. *Mol Aspects Med*  
14 2003;24(1-3):39-52.  
15  
16 512  
17 513 56 Song Y, Ridker PM, Manson JE, *et al.* Magnesium intake, C-reactive protein, and  
18 the prevalence of metabolic syndrome in middle-aged and older U.S. women.  
19  
20 514  
21 515 *Diabetes Care* 2005;28(6):1438-44.  
22  
23 516 57 Guerrero-Romero F, Rodriguez-Moran M. Complementary therapies for diabetes:  
24 the case for chromium, magnesium, and antioxidants. *Arch Med Res*  
25 2005;36(3):250-7.  
26  
27 518  
28 519 58 Huerta MG, Roemmich JN, Kington ML, *et al.* Magnesium deficiency is  
29 associated with insulin resistance in obese children. *Diabetes Care*  
30 2005;28(5):1175-81.  
31  
32 521  
33 522 59 Djurhuus MS, Skott P, Hother-Nielson O, *et al.* Insulin increases renal  
34 magnesium excretion: a possible cause of magnesium depletion in  
35 hyperinsulinaemic states. *Diabet Med* 1995;12(8):664-9.  
36  
37 523  
38 524  
39 525 60 Paolisso G, Sgambato S, Passariello N, *et al.* Insulin induces opposite changes in  
40 plasma and erythrocyte magnesium concentrations in normal man. *Diabetologia*  
41 1986;29(9):644-7.  
42  
43 527  
44 528 61 Bonora E, Targher G, Zenere MB, *et al.* Relationship of uric acid concentration to  
45 cardiovascular risk factors in young men. Role of obesity and central fat  
46 distribution. The Verona Young Men Atherosclerosis Risk Factors Study. *Int J*  
47  
48 529  
49 530  
50 531 *Obes Relat Metab Disord* 1996;20(11):975-80.  
51  
52 532 62 Lyngdoh T, Marques-Vidal P, Paccaud F, *et al.* Elevated serum uric acid is  
53 associated with high circulating inflammatory cytokines in the population-based  
54  
55 533  
56 534 Colaas study. *PLoS One* 2011;6(5):e19901.

- 1  
2  
3 535 63 Kirilmaz B, Asgun F, Alioglu E, *et al.* High inflammatory activity related to the  
4 536 number of metabolic syndrome components. *J Clin Hypertens (Greenwich)*  
5 2010;12(2):136-44.  
6  
7  
8 538 64 Salmonowicz B, Krzystek-Korpacka M, Noczynska A. Trace elements,  
9 539 magnesium, and the efficacy of antioxidant systems in children with type 1  
10 540 diabetes mellitus and in their siblings. *Adv Clin Exp Med* 2014;23(2):259-68.  
11  
12 541 65 M RGN, F G. Elevated serum concentration of tumor necrosis factor-alpha is  
13 542 linked to low serum magnesium levels in the obesity-related inflammatory  
14 543 response. *Magnes Res* 2004;17:189-96.  
15  
16 544 66 Li H, Zeng C, Wei J, *et al.* Serum Calcium Concentration Is Inversely Associated  
17 545 With Radiographic Knee Osteoarthritis: A Cross-Sectional Study. *Medicine*  
18 546 (*Baltimore*) 2016;95(6):e2838.  
19  
20 547 67 Chacko SA, Song Y, Nathan L, *et al.* Relations of dietary magnesium intake to  
21 548 biomarkers of inflammation and endothelial dysfunction in an ethnically diverse  
22 549 cohort of postmenopausal women. *Diabetes Care* 2010;33(2):304-10.  
23  
24 550 68 Bo S, Durazzo M, Guidi S, *et al.* Dietary magnesium and fiber intakes and  
25 551 inflammatory and metabolic indicators in middle-aged subjects from a  
26 552 population-based cohort. *Am J Clin Nutr* 2006;84(5):1062-9.  
27  
28 553 69 Kim DJ, Xun P, Liu K, *et al.* Magnesium intake in relation to systemic  
29 554 inflammation, insulin resistance, and the incidence of diabetes. *Diabetes Care*  
30 555 2010;33(12):2604-10.  
31  
32 556 70 Spector TD, Hart DJ, Nandra D, *et al.* Low-level increases in serum C-reactive  
33 557 protein are present in early osteoarthritis of the knee and predict progressive  
34 558 disease. *Arthritis Rheum* 1997;40(4):723-7.  
35  
36 559 71 Smith JW, Martins TB, Gopez E, *et al.* Significance of C-reactive protein in  
37 560 osteoarthritis and total knee arthroplasty outcomes. *Ther Adv Musculoskelet Dis*  
38 561 2012;4(5):315-25.  
39  
40 562 72 Topf JM, Murray PT. Hypomagnesemia and hypermagnesemia. *Rev Endocr*  
41 563 *Metab Disord* 2003;4(2):195-206.  
42  
43 564 73 Sabatier M, Pont F, Arnaud MJ, *et al.* A compartmental model of magnesium  
44  
45  
46  
47  
48  
49  
50  
51  
52  
53  
54  
55  
56  
57  
58  
59  
60

1  
2  
3  
4  
5  
6  
7  
8  
9  
10  
11  
12  
13  
14  
15  
16  
17  
18  
19  
20  
21  
22  
23  
24  
25  
26  
27  
28  
29  
30  
31  
32  
33  
34  
35  
36  
37  
38  
39  
40  
41  
42  
43  
44  
45  
46  
47  
48  
49  
50  
51  
52  
53  
54  
55  
56  
57  
58  
59  
60

565 metabolism in healthy men based on two stable isotope tracers. *Am J Physiol*  
566 *Regul Integr Comp Physiol* 2003;285(3):R656-63.  
567

For peer review only

568 Table 1 Basic characteristics of included subjects according to quintiles of serum Mg (n=962)

|                                  | Quintiles of serum Mg |              |              |              |              | P     |
|----------------------------------|-----------------------|--------------|--------------|--------------|--------------|-------|
|                                  | Q1 (lowest)           | Q2           | Q3           | Q4           | Q5 (highest) |       |
| Median Mg concentration (mmol/L) | 0.82                  | 0.87         | 0.91         | 0.94         | 0.99         | -     |
| Participants (n)                 | 200                   | 215          | 190          | 168          | 189          | -     |
| Age (years)                      | 53.8 (7.3)            | 54.6 (7.6)   | 55.2 (7.9)   | 55.3 (7.1)   | 56.1 (8.0)   | 0.062 |
| BMI (kg/m <sup>2</sup> )         | 25.2 (3.2)            | 24.9 (3.2)   | 25.0 (3.7)   | 25.2 (3.4)   | 24.6 (3.2)   | 0.464 |
| Female (%)                       | 37.5                  | 42.3         | 36.8         | 42.3         | 37.0         | 0.627 |
| Smoking (%)                      | 27.5                  | 27.4         | 21.6         | 24.4         | 21.7         | 0.457 |
| Alcohol drinking (%)             | 34.5                  | 36.3         | 40.5         | 41.1         | 38.1         | 0.645 |
| High school diploma (%)          | 45.0                  | 47.4         | 45.3         | 56.5         | 48.1         | 0.184 |
| Activity level (h/w)             | 2.0 (3.5)             | 2.0 (3.3)    | 2.3 (3.5)    | 2.1 (3.1)    | 2.4 (3.5)    | 0.457 |
| Fasting glucose (mmol/l)         | 6.6 (3.0)             | 5.7 (1.7)    | 5.7 (1.4)    | 5.5 (0.9)    | 5.5 (1.6)    | 0.009 |
| Systolic pressure (mm Hg)        | 129.2 (16.9)          | 128.3 (17.9) | 130.4 (16.2) | 128.8 (16.3) | 129.6 (17.7) | 0.837 |
| Diastolic pressure (mm Hg)       | 81.2 (11.8)           | 79.8 (12.1)  | 80.7 (11.0)  | 80.7 (10.7)  | 80.3 (10.5)  | 0.654 |
| HDL-cholesterol (mmol/l)         | 1.5 (0.4)             | 1.5 (0.4)    | 1.5 (0.4)    | 1.5 (0.3)    | 1.5 (0.4)    | 0.374 |
| Triglyceride (mmol/l)            | 2.1 (1.9)             | 1.8 (1.5)    | 2.0 (2.1)    | 1.8 (1.0)    | 2.3 (2.9)    | 0.620 |

1  
2  
3  
4  
5  
6  
7  
8  
9  
10  
11  
12  
13  
14  
15  
16  
17  
18  
19  
20  
21  
22  
23  
24  
25  
26  
27  
28  
29  
30  
31  
32  
33  
34  
35  
36  
37  
38  
39  
40  
41  
42  
43  
44  
45  
46  
47

|                                   |               |              |              |              |              |        |
|-----------------------------------|---------------|--------------|--------------|--------------|--------------|--------|
| Uric acid (µmol/l)                | 337.3 (101.7) | 329.0 (80.7) | 321.3 (86.3) | 331.5 (78.0) | 329.4 (81.7) | 0.590  |
| eGFR (ml/min/1.73m <sup>2</sup> ) | 80.2 (14.4)   | 77.7 (10.7)  | 76.0 (10.6)  | 75.8 (10.7)  | 74.3 (12.0)  | <0.001 |
| MetS (%)                          | 26.5          | 17.7         | 25.8         | 19.6         | 17.5         | 0.059  |
| DM (%)                            | 23.5          | 10.7         | 10.0         | 8.3          | 6.3          | <0.001 |
| HP (%)                            | 40.0          | 33.5         | 37.4         | 42.3         | 40.2         | 0.432  |
| HU (%)                            | 25.5          | 19.1         | 13.2         | 18.5         | 14.8         | 0.018  |

569 Data are mean (Standard Deviation), unless otherwise indicated; Mg, magnesium; OA, osteoarthritis; BMI, body mass index; HDL, high density lipoprotein; eGFR,  
570 estimated glomerular filtration rate; MetS, metabolic syndrome; DM, diabetes mellitus; HP, hypertension; HU, hyperuricemia.  
571 # P values are for test of difference across all quintiles of serum Mg.  
572

1  
2  
3  
4  
5  
6  
7 573 Figure 1 The prevalence of MetS (A), DM (B), HP (C) and HU (D) in each quintile of serum Mg in OA patients  
8  
9  
10  
11  
12  
13  
14  
15  
16  
17  
18  
19  
20  
21  
22  
23  
24  
25  
26  
27  
28  
29  
30  
31  
32  
33  
34  
35  
36  
37  
38  
39  
40  
41  
42  
43  
44  
45  
46  
47

574

For peer review only



575 Table 2 Multivariable-adjusted relations of serum Mg and MetS in OA patients (n = 962)

|                                  | Quintiles of serum Mg |                   |                   |                   |                   | P for trend |
|----------------------------------|-----------------------|-------------------|-------------------|-------------------|-------------------|-------------|
|                                  | Q1 (lowest)           | Q2                | Q3                | Q4                | Q5 (highest)      |             |
| Median Mg concentration (mmol/L) | 0.82                  | 0.87              | 0.91              | 0.94              | 0.99              | -           |
| Participants (n)                 | 200                   | 215               | 190               | 168               | 189               | -           |
| MetS (%)                         | 26.5                  | 17.7              | 25.8              | 19.6              | 17.5              | -           |
| Model 1*                         | 1.00 (reference)      | 0.61 (0.38, 0.97) | 0.97 (0.61, 1.52) | 0.69 (0.42, 1.14) | 0.59 (0.36, 0.96) | 0.090       |
| P value                          | -                     | 0.038             | 0.881             | 0.150             | 0.035             | -           |
| Model 2*                         | 1.00 (reference)      | 0.60 (0.37, 0.96) | 1.00 (0.63, 1.57) | 0.70 (0.42, 1.15) | 0.61 (0.37, 0.99) | 0.120       |
| P value                          | -                     | 0.035             | 0.99              | 0.160             | 0.047             | -           |
| Model 3*                         | 1.00 (reference)      | 0.59 (0.36, 0.94) | 0.95 (0.60, 1.51) | 0.67 (0.40, 1.10) | 0.56 (0.34, 0.93) | 0.067       |
| P value                          | -                     | 0.027             | 0.830             | 0.114             | 0.024             | -           |

576 Data are adjusted OR (95% CI), unless otherwise indicated; Mg, magnesium; n, number; OA, osteoarthritis; MetS, metabolic syndrome.

577 \*Model 1 was adjusted for age (continuous data) and gender (male, female); Model 2 was adjusted for age (continuous data), gender (male, female), educational  
578 level (high school or above, lower than high school), smoking status (yes, no), activity level (continuous data), alcohol drinking status (yes, no); Model 3 was  
579 adjusted based on model 2, with additional factor of eGFR (continuous data).

580

581 Table 3 Multivariable-adjusted relations of serum Mg and DM in OA patients (n = 962)

|                                  | Quintiles of serum Mg |                   |                   |                   |                   | <i>P</i> for trend |
|----------------------------------|-----------------------|-------------------|-------------------|-------------------|-------------------|--------------------|
|                                  | Q1 (lowest)           | Q2                | Q3                | Q4                | Q5 (highest)      |                    |
| Median Mg concentration (mmol/L) | 0.82                  | 0.87              | 0.91              | 0.94              | 0.99              | -                  |
| Participants (n)                 | 200                   | 215               | 190               | 168               | 189               | -                  |
| DM (%)                           | 23.5                  | 10.7              | 10.0              | 8.3               | 6.3               | -                  |
| Model 1*                         | 1.00 (reference)      | 0.38 (0.22, 0.66) | 0.34 (0.19, 0.61) | 0.29 (0.15, 0.55) | 0.20 (0.10, 0.40) | <0.001             |
| <i>P</i> value                   | -                     | 0.001             | <0.001            | <0.001            | <0.001            | -                  |
| Model 2*                         | 1.00 (reference)      | 0.40 (0.23, 0.70) | 0.32 (0.18, 0.59) | 0.26 (0.13, 0.50) | 0.21 (0.11, 0.42) | <0.001             |
| <i>P</i> value                   | -                     | 0.001             | <0.001            | <0.001            | <0.001            | -                  |
| Model 3*                         | 1.00 (reference)      | 0.40 (0.23, 0.70) | 0.33 (0.18, 0.60) | 0.27 (0.14, 0.52) | 0.22 (0.11, 0.44) | <0.001             |
| <i>P</i> value                   | -                     | 0.001             | <0.001            | <0.001            | <0.001            | -                  |

582 Data are adjusted OR (95% CI), unless otherwise indicated; Mg, magnesium; n, number; OA, osteoarthritis; DM, diabetes mellitus.

583 \*Model 1 was adjusted for age (continuous data) and gender (male, female); Model 2 was adjusted for age (continuous data), BMI (continuous data), gender (male,  
584 female), educational level (high school or above, lower than high school), smoking status (yes, no), activity level (continuous data), alcohol drinking status (yes, no),  
585 hypertension (yes, no), and dyslipidemia (yes, no); Model 3 was adjusted based on model 2, with additional factor of eGFR (continuous data).

586

587 Table 4 Multivariable-adjusted relations of serum Mg and HP in OA patients (n = 962)

|                                  | Quintiles of serum Mg |                   |                   |                   |                   | <i>P</i> for trend |
|----------------------------------|-----------------------|-------------------|-------------------|-------------------|-------------------|--------------------|
|                                  | Q1 (lowest)           | Q2                | Q3                | Q4                | Q5 (highest)      |                    |
| Median Mg concentration (mmol/L) | 0.82                  | 0.87              | 0.91              | 0.94              | 0.99              | -                  |
| Participants (n)                 | 200                   | 215               | 190               | 168               | 189               | -                  |
| HP (%)                           | 40.0                  | 33.5              | 37.4              | 42.3              | 40.2              | -                  |
| Model 1*                         | 1.00 (reference)      | 0.71 (0.47, 1.06) | 0.83 (0.54, 1.25) | 1.00 (0.66, 1.54) | 0.89 (0.59, 1.35) | 0.929              |
| <i>P</i> value                   | -                     | 0.095             | 0.368             | 0.987             | 0.582             | -                  |
| Model 2*                         | 1.00 (reference)      | 0.77 (0.50, 1.19) | 0.89 (0.57, 1.39) | 1.10 (0.70, 1.74) | 1.08 (0.69, 1.68) | 0.377              |
| <i>P</i> value                   | -                     | 0.245             | 0.608             | 0.686             | 0.744             | -                  |
| Model 3*                         | 1.00 (reference)      | 0.77 (0.50, 1.19) | 0.88 (0.56, 1.38) | 1.09 (0.68, 1.72) | 1.05 (0.67, 1.65) | 0.434              |
| <i>P</i> value                   | -                     | 0.235             | 0.574             | 0.727             | 0.818             | -                  |

588 Data are adjusted OR (95% CI), unless otherwise indicated; Mg, magnesium; n, number; OA, osteoarthritis; HP, hypertension.

589 \* Model 1 was adjusted for age (continuous data) and gender (male, female); Model 2 was adjusted for age (continuous data), BMI (continuous data), gender (male,  
590 female), educational level (high school or above, lower than high school), smoking status (yes, no), activity level (continuous data), alcohol drinking status (yes, no),  
591 diabetes (yes, no), and dyslipidemia (yes, no); Model 3 was adjusted based on model 2, with additional factor of eGFR (continuous data).

593 Table 5 Multivariable-adjusted relations of serum Mg and HU in OA patients (n = 962)

|                                  | Quintiles of serum Mg |                   |                   |                   |                   | <i>P</i> for trend |
|----------------------------------|-----------------------|-------------------|-------------------|-------------------|-------------------|--------------------|
|                                  | Q1 (lowest)           | Q2                | Q3                | Q4                | Q5 (highest)      |                    |
| Median Mg concentration (mmol/L) | 0.82                  | 0.87              | 0.91              | 0.94              | 0.99              | -                  |
| Participants (n)                 | 200                   | 215               | 190               | 168               | 189               | -                  |
| HU (%)                           | 25.5                  | 19.1              | 13.2              | 18.5              | 14.8              | -                  |
| Model 1*                         | 1.00 (reference)      | 0.71 (0.44, 1.14) | 0.44 (0.26, 0.75) | 0.68 (0.41, 1.14) | 0.51 (0.30, 0.85) | 0.008              |
| <i>P</i> value                   | -                     | 0.157             | 0.002             | 0.144             | 0.010             | -                  |
| Model 2*                         | 1.00 (reference)      | 0.73 (0.45, 1.20) | 0.38 (0.22, 0.67) | 0.59 (0.35, 1.02) | 0.50 (0.29, 0.87) | 0.006              |
| <i>P</i> value                   | -                     | 0.210             | 0.001             | 0.058             | 0.013             | -                  |
| Model 3*                         | 1.00 (reference)      | 0.68 (0.41, 1.14) | 0.33 (0.19, 0.59) | 0.52 (0.30, 0.91) | 0.39 (0.22, 0.70) | <0.001             |
| <i>P</i> value                   | -                     | 0.142             | <0.001            | 0.022             | 0.001             | -                  |

594 Data are adjusted OR (95% CI), unless otherwise indicated; Mg, magnesium; n, number; OA, osteoarthritis; HU, hyperuricemia.

595 \* Model 1 was adjusted for age (continuous data) and gender (male, female); Model 2 was adjusted for age (continuous data), BMI (continuous data), gender (male,  
 596 female), educational level (high school or above, lower than high school), smoking status (yes, no), activity level (continuous data), alcohol drinking status (yes, no),  
 597 hypertension (yes, no), diabetes (yes, no), and dyslipidemia (yes, no); Model 3 was adjusted based on model 2, with additional factor of eGFR (continuous data)

1  
2  
3  
4  
5  
6  
7  
8  
9  
10  
11  
12  
13  
14  
15  
16  
17  
18  
19  
20  
21  
22  
23  
24  
25  
26  
27  
28  
29  
30  
31  
32  
33  
34  
35  
36  
37  
38  
39  
40  
41  
42  
43  
44  
45  
46  
47  
48  
49  
50  
51  
52  
53  
54  
55  
56  
57  
58  
59  
60

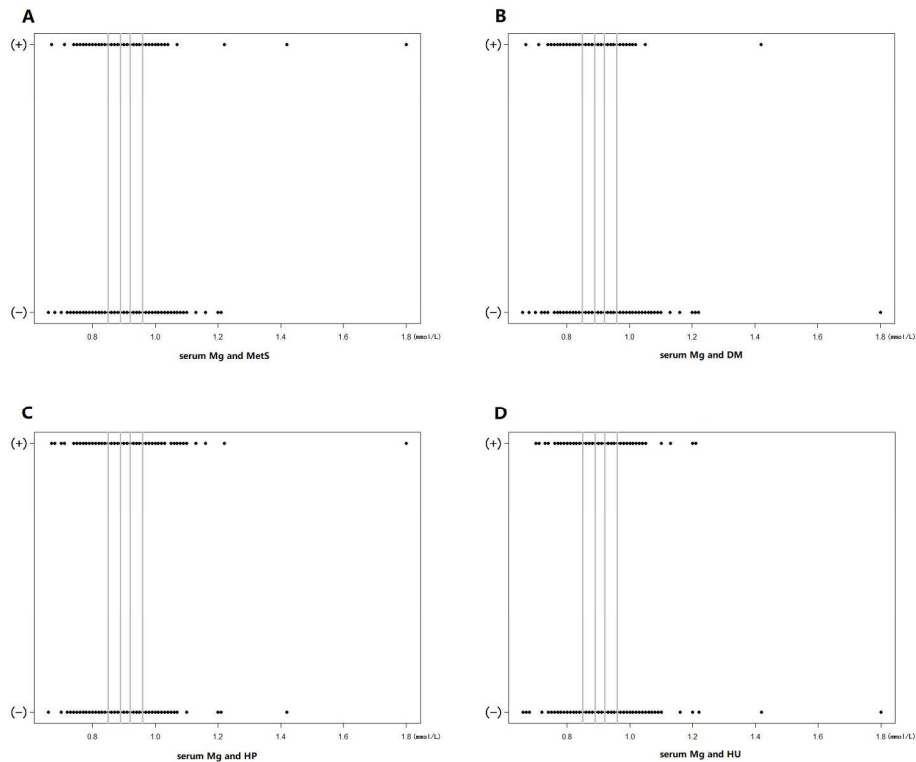

Figure 1 The prevalence of MetS (A), DM (B), HP (C) and HU (D) in each quintile of serum Mg in OA patients.

576x474mm (300 x 300 DPI)

only

## STROBE Statement—checklist of items that should be included in reports of observational studies

|                           | Item No | Recommendation                                                                                                                                                                             | Reported on Page No |
|---------------------------|---------|--------------------------------------------------------------------------------------------------------------------------------------------------------------------------------------------|---------------------|
| <b>Title and abstract</b> | 1       | (a) Indicate the study's design with a commonly used term in the title or the abstract                                                                                                     | 2                   |
|                           |         | (b) Provide in the abstract an informative and balanced summary of what was done and what was found                                                                                        | 2                   |
| <b>Introduction</b>       |         |                                                                                                                                                                                            |                     |
| Background/rationale      | 2       | Explain the scientific background and rationale for the investigation being reported                                                                                                       | 4                   |
| Objectives                | 3       | State specific objectives, including any prespecified hypotheses                                                                                                                           | 4                   |
| <b>Methods</b>            |         |                                                                                                                                                                                            |                     |
| Study design              | 4       | Present key elements of study design early in the paper                                                                                                                                    | 4-5                 |
| Setting                   | 5       | Describe the setting, locations, and relevant dates, including periods of recruitment, exposure, follow-up, and data collection                                                            | 4-5                 |
| Participants              | 6       | (a) <i>Cohort study</i> —Give the eligibility criteria, and the sources and methods of selection of participants. Describe methods of follow-up                                            | 4-5                 |
|                           |         | <i>Case-control study</i> —Give the eligibility criteria, and the sources and methods of case ascertainment and control selection. Give the rationale for the choice of cases and controls |                     |
|                           |         | <i>Cross-sectional study</i> —Give the eligibility criteria, and the sources and methods of selection of participants                                                                      |                     |
|                           |         | (b) <i>Cohort study</i> —For matched studies, give matching criteria and number of exposed and unexposed                                                                                   | -                   |
|                           |         | <i>Case-control study</i> —For matched studies, give matching criteria and the number of controls per case                                                                                 |                     |
| Variables                 | 7       | Clearly define all outcomes, exposures, predictors, potential confounders, and effect modifiers. Give diagnostic criteria, if applicable                                                   | <del>5</del> -6     |
| Data sources/measurement  | 8*      | For each variable of interest, give sources of data and details of methods of assessment (measurement). Describe comparability of assessment methods if there is more than one group       | 5-6                 |
| Bias                      | 9       | Describe any efforts to address potential sources of bias                                                                                                                                  | 6-7                 |
| Study size                | 10      | Explain how the study size was arrived at                                                                                                                                                  | <del>4</del> -5     |
| Quantitative variables    | 11      | Explain how quantitative variables were handled in the analyses. If applicable, describe which groupings were chosen and why                                                               | 6-7                 |
| Statistical methods       | 12      | (a) Describe all statistical methods, including those used to control for confounding                                                                                                      | 6-7                 |
|                           |         | (b) Describe any methods used to examine subgroups and interactions                                                                                                                        | -                   |
|                           |         | (c) Explain how missing data were addressed                                                                                                                                                | -                   |
|                           |         | (d) <i>Cohort study</i> —If applicable, explain how loss to follow-up was addressed                                                                                                        | <del>4</del> -5     |
|                           |         | <i>Case-control study</i> —If applicable, explain how matching of cases and controls was addressed                                                                                         |                     |
|                           |         | <i>Cross-sectional study</i> —If applicable, describe analytical methods taking account of sampling strategy                                                                               |                     |
|                           |         | (e) Describe any sensitivity analyses                                                                                                                                                      | <del>5</del> -6-7   |

Continued on next page

**Results**

|                          |     |                                                                                                                                                                                                              |                |
|--------------------------|-----|--------------------------------------------------------------------------------------------------------------------------------------------------------------------------------------------------------------|----------------|
| Participants             | 13* | (a) Report numbers of individuals at each stage of study—eg numbers potentially eligible, examined for eligibility, confirmed eligible, included in the study, completing follow-up, and analysed            | <u>4-5</u>     |
|                          |     | (b) Give reasons for non-participation at each stage                                                                                                                                                         | <u>4-5</u>     |
|                          |     | (c) Consider use of a flow diagram                                                                                                                                                                           | -              |
| Descriptive data         | 14* | (a) Give characteristics of study participants (eg demographic, clinical, social) and information on exposures and potential confounders                                                                     | 8              |
|                          |     | (b) Indicate number of participants with missing data for each variable of interest                                                                                                                          | -              |
|                          |     | (c) <i>Cohort study</i> —Summarise follow-up time (eg, average and total amount)                                                                                                                             | -              |
| Outcome data             | 15* | <i>Cohort study</i> —Report numbers of outcome events or summary measures over time                                                                                                                          | -              |
|                          |     | <i>Case-control study</i> —Report numbers in each exposure category, or summary measures of exposure                                                                                                         | -              |
|                          |     | <i>Cross-sectional study</i> —Report numbers of outcome events or summary measures                                                                                                                           | <u>8-10-9</u>  |
| Main results             | 16  | (a) Give unadjusted estimates and, if applicable, confounder-adjusted estimates and their precision (eg, 95% confidence interval). Make clear which confounders were adjusted for and why they were included | <u>8-10-9</u>  |
|                          |     | (b) Report category boundaries when continuous variables were categorized                                                                                                                                    | <u>8-10-9</u>  |
|                          |     | (c) If relevant, consider translating estimates of relative risk into absolute risk for a meaningful time period                                                                                             | -              |
| Other analyses           | 17  | Report other analyses done—eg analyses of subgroups and interactions, and sensitivity analyses                                                                                                               | <u>8-10-9</u>  |
| <b>Discussion</b>        |     |                                                                                                                                                                                                              |                |
| Key results              | 18  | Summarise key results with reference to study objectives                                                                                                                                                     | <u>9-10</u>    |
| Limitations              | 19  | Discuss limitations of the study, taking into account sources of potential bias or imprecision. Discuss both direction and magnitude of any potential bias                                                   | 11-12          |
| Interpretation           | 20  | Give a cautious overall interpretation of results considering objectives, limitations, multiplicity of analyses, results from similar studies, and other relevant evidence                                   | <u>9-10-11</u> |
| Generalisability         | 21  | Discuss the generalisability (external validity) of the study results                                                                                                                                        | 11-12          |
| <b>Other information</b> |     |                                                                                                                                                                                                              |                |
| Funding                  | 22  | Give the source of funding and the role of the funders for the present study and, if applicable, for the original study on which the present article is based                                                | 13             |

\*Give information separately for cases and controls in case-control studies and, if applicable, for exposed and unexposed groups in cohort and cross-sectional studies.

**Note:** An Explanation and Elaboration article discusses each checklist item and gives methodological background and published examples of transparent reporting. The STROBE checklist is best used in conjunction with this article (freely available on the Web sites of PLoS Medicine at <http://www.plosmedicine.org/>, Annals of Internal Medicine at <http://www.annals.org/>, and Epidemiology at <http://www.epidem.com/>). Information on the STROBE Initiative is available at [www.strobe-statement.org](http://www.strobe-statement.org).

## STROBE Statement—checklist of items that should be included in reports of observational studies

|                           | Item No | Recommendation                                                                                                                                                                             | Reported on Page No |
|---------------------------|---------|--------------------------------------------------------------------------------------------------------------------------------------------------------------------------------------------|---------------------|
| <b>Title and abstract</b> | 1       | (a) Indicate the study's design with a commonly used term in the title or the abstract                                                                                                     | 2                   |
|                           |         | (b) Provide in the abstract an informative and balanced summary of what was done and what was found                                                                                        | 2                   |
| <b>Introduction</b>       |         |                                                                                                                                                                                            |                     |
| Background/rationale      | 2       | Explain the scientific background and rationale for the investigation being reported                                                                                                       | 4                   |
| Objectives                | 3       | State specific objectives, including any prespecified hypotheses                                                                                                                           | 4                   |
| <b>Methods</b>            |         |                                                                                                                                                                                            |                     |
| Study design              | 4       | Present key elements of study design early in the paper                                                                                                                                    | 4-5                 |
| Setting                   | 5       | Describe the setting, locations, and relevant dates, including periods of recruitment, exposure, follow-up, and data collection                                                            | 4-5                 |
| Participants              | 6       | (a) <i>Cohort study</i> —Give the eligibility criteria, and the sources and methods of selection of participants. Describe methods of follow-up                                            | 4-5                 |
|                           |         | <i>Case-control study</i> —Give the eligibility criteria, and the sources and methods of case ascertainment and control selection. Give the rationale for the choice of cases and controls |                     |
|                           |         | <i>Cross-sectional study</i> —Give the eligibility criteria, and the sources and methods of selection of participants                                                                      |                     |
|                           |         | (b) <i>Cohort study</i> —For matched studies, give matching criteria and number of exposed and unexposed                                                                                   | -                   |
|                           |         | <i>Case-control study</i> —For matched studies, give matching criteria and the number of controls per case                                                                                 |                     |
| Variables                 | 7       | Clearly define all outcomes, exposures, predictors, potential confounders, and effect modifiers. Give diagnostic criteria, if applicable                                                   | 4-6                 |
| Data sources/measurement  | 8*      | For each variable of interest, give sources of data and details of methods of assessment (measurement). Describe comparability of assessment methods if there is more than one group       | 5-6                 |
| Bias                      | 9       | Describe any efforts to address potential sources of bias                                                                                                                                  | 6-7                 |
| Study size                | 10      | Explain how the study size was arrived at                                                                                                                                                  | 4-5                 |
| Quantitative variables    | 11      | Explain how quantitative variables were handled in the analyses. If applicable, describe which groupings were chosen and why                                                               | 6-7                 |
| Statistical methods       | 12      | (a) Describe all statistical methods, including those used to control for confounding                                                                                                      | 6-7                 |
|                           |         | (b) Describe any methods used to examine subgroups and interactions                                                                                                                        | -                   |
|                           |         | (c) Explain how missing data were addressed                                                                                                                                                | -                   |
|                           |         | (d) <i>Cohort study</i> —If applicable, explain how loss to follow-up was addressed                                                                                                        | 4-5                 |
|                           |         | <i>Case-control study</i> —If applicable, explain how matching of cases and controls was addressed                                                                                         |                     |
|                           |         | <i>Cross-sectional study</i> —If applicable, describe analytical methods taking account of sampling strategy                                                                               |                     |
|                           |         | (e) Describe any sensitivity analyses                                                                                                                                                      | 6-7                 |

Continued on next page



**Results**

|                  |     |                                                                                                                                                                                                              |      |
|------------------|-----|--------------------------------------------------------------------------------------------------------------------------------------------------------------------------------------------------------------|------|
| Participants     | 13* | (a) Report numbers of individuals at each stage of study—eg numbers potentially eligible, examined for eligibility, confirmed eligible, included in the study, completing follow-up, and analysed            | 4-5  |
|                  |     | (b) Give reasons for non-participation at each stage                                                                                                                                                         | 4-5  |
|                  |     | (c) Consider use of a flow diagram                                                                                                                                                                           | -    |
| Descriptive data | 14* | (a) Give characteristics of study participants (eg demographic, clinical, social) and information on exposures and potential confounders                                                                     | 8    |
|                  |     | (b) Indicate number of participants with missing data for each variable of interest                                                                                                                          | -    |
|                  |     | (c) <i>Cohort study</i> —Summarise follow-up time (eg, average and total amount)                                                                                                                             | -    |
| Outcome data     | 15* | <i>Cohort study</i> —Report numbers of outcome events or summary measures over time                                                                                                                          | -    |
|                  |     | <i>Case-control study</i> —Report numbers in each exposure category, or summary measures of exposure                                                                                                         | -    |
|                  |     | <i>Cross-sectional study</i> —Report numbers of outcome events or summary measures                                                                                                                           | 8-10 |
| Main results     | 16  | (a) Give unadjusted estimates and, if applicable, confounder-adjusted estimates and their precision (eg, 95% confidence interval). Make clear which confounders were adjusted for and why they were included | 8-10 |
|                  |     | (b) Report category boundaries when continuous variables were categorized                                                                                                                                    | 8-10 |
|                  |     | (c) If relevant, consider translating estimates of relative risk into absolute risk for a meaningful time period                                                                                             | -    |
| Other analyses   | 17  | Report other analyses done—eg analyses of subgroups and interactions, and sensitivity analyses                                                                                                               | 8-10 |

**Discussion**

|                  |    |                                                                                                                                                                            |       |
|------------------|----|----------------------------------------------------------------------------------------------------------------------------------------------------------------------------|-------|
| Key results      | 18 | Summarise key results with reference to study objectives                                                                                                                   | 10    |
| Limitations      | 19 | Discuss limitations of the study, taking into account sources of potential bias or imprecision. Discuss both direction and magnitude of any potential bias                 | 11-12 |
| Interpretation   | 20 | Give a cautious overall interpretation of results considering objectives, limitations, multiplicity of analyses, results from similar studies, and other relevant evidence | 10-11 |
| Generalisability | 21 | Discuss the generalisability (external validity) of the study results                                                                                                      | 11-12 |

**Other information**

|         |    |                                                                                                                                                               |    |
|---------|----|---------------------------------------------------------------------------------------------------------------------------------------------------------------|----|
| Funding | 22 | Give the source of funding and the role of the funders for the present study and, if applicable, for the original study on which the present article is based | 13 |
|---------|----|---------------------------------------------------------------------------------------------------------------------------------------------------------------|----|

\*Give information separately for cases and controls in case-control studies and, if applicable, for exposed and unexposed groups in cohort and cross-sectional studies.

**Note:** An Explanation and Elaboration article discusses each checklist item and gives methodological background and published examples of transparent reporting. The STROBE checklist is best used in conjunction with this article (freely available on the Web sites of PLoS Medicine at <http://www.plosmedicine.org/>, Annals of Internal Medicine at <http://www.annals.org/>, and Epidemiology at <http://www.epidem.com/>). Information on the STROBE Initiative is available at [www.strobe-statement.org](http://www.strobe-statement.org).

# BMJ Open

## Association between Serum Magnesium Concentration with Metabolic Syndrome, Diabetes, Hypertension and Hyperuricemia in Knee Osteoarthritis

|                                 |                                                                                                                                                                                                                                                                                                                                                                                                                                                                                                                                                                                                                                                                                                                                                                                                                                                                               |
|---------------------------------|-------------------------------------------------------------------------------------------------------------------------------------------------------------------------------------------------------------------------------------------------------------------------------------------------------------------------------------------------------------------------------------------------------------------------------------------------------------------------------------------------------------------------------------------------------------------------------------------------------------------------------------------------------------------------------------------------------------------------------------------------------------------------------------------------------------------------------------------------------------------------------|
| Journal:                        | <i>BMJ Open</i>                                                                                                                                                                                                                                                                                                                                                                                                                                                                                                                                                                                                                                                                                                                                                                                                                                                               |
| Manuscript ID                   | bmjopen-2017-019159.R3                                                                                                                                                                                                                                                                                                                                                                                                                                                                                                                                                                                                                                                                                                                                                                                                                                                        |
| Article Type:                   | Research                                                                                                                                                                                                                                                                                                                                                                                                                                                                                                                                                                                                                                                                                                                                                                                                                                                                      |
| Date Submitted by the Author:   | 11-Jun-2018                                                                                                                                                                                                                                                                                                                                                                                                                                                                                                                                                                                                                                                                                                                                                                                                                                                                   |
| Complete List of Authors:       | Wang, Yi-lun; Xiangya Hospital Central South University, Orthopaedics<br>Wei, Jie; Xiangya Hospital Central South University, Health Management Center<br>Zeng, Chao; Xiangya Hospital Central South University, Orthopaedics<br>Yang, Tuo; Xiangya Hospital Central South University, Orthopaedics<br>Li, Hui; Xiangya Hospital Central South University, Orthopaedics<br>Cui, Yang; Xiangya Hospital Central South University, International Medical Center<br>Xie, Dong-xing; Xiangya Hospital, Central South University, Orthopaedics<br>Xu, Bei; Xiangya Hospital Central South University, Orthopaedics<br>Liu, Zhi-chen; Xiangya Hospital Central South University, Orthopaedics<br>Li, Jia-tian; Xiangya Hospital Central South University, Orthopaedics<br>Jiang, Shi-de; Xiangya Hospital Central South University<br>Lei, Guanghua; Xiangya Hospital, Orthopaedics |
| <b>Primary Subject Heading</b>: | Rheumatology                                                                                                                                                                                                                                                                                                                                                                                                                                                                                                                                                                                                                                                                                                                                                                                                                                                                  |
| Secondary Subject Heading:      | Rheumatology, Public health, Epidemiology                                                                                                                                                                                                                                                                                                                                                                                                                                                                                                                                                                                                                                                                                                                                                                                                                                     |
| Keywords:                       | osteoarthritis, magnesium, metabolic syndrome, diabetes, Hypertension < CARDIOLOGY, hyperuricemia                                                                                                                                                                                                                                                                                                                                                                                                                                                                                                                                                                                                                                                                                                                                                                             |
|                                 |                                                                                                                                                                                                                                                                                                                                                                                                                                                                                                                                                                                                                                                                                                                                                                                                                                                                               |

SCHOLARONE™  
Manuscripts

1  
2  
3 **1 Association between Serum Magnesium Concentration with Metabolic**  
4 **2 Syndrome, Diabetes, Hypertension and Hyperuricemia in Knee Osteoarthritis**  
5  
6

7 3

8 4 Yi-lun Wang<sup>1</sup>, Jie Wei<sup>2</sup>, Chao Zeng<sup>1</sup>, Tuo Yang<sup>1</sup>, Hui Li<sup>1</sup>, Yang Cui<sup>3</sup>, Dong-xing Xie<sup>1</sup>,  
9 Bei Xu<sup>1</sup>, Zhi-chen Liu<sup>1</sup>, Jia-tian Li<sup>1</sup>, Shi-de Jiang<sup>1</sup>, Guang-hua Lei<sup>1\*</sup>  
10  
11  
12

13 6

14 <sup>1</sup>Department of Orthopaedics, Xiangya Hospital, Central South University, Changsha,  
15 Hunan Province, China, 410008;  
16

17 <sup>2</sup>Health Management Center, Xiangya Hospital, Central South University, Changsha,  
18 Hunan Province, China. 410008;  
19  
20

21 <sup>3</sup>International Medical Center, Xiangya Hospital, Central South University, Changsha,  
22 Hunan Province, China. 410008;  
23  
24

25 13

26  
27 \*Correspondence to: Guang-hua Lei, MD, PhD, Department of Orthopaedics,  
28 Xiangya Hospital, Central South University, #87 Xiangya Road, Changsha, Hunan,  
29 China, 410008. E-mail: lei\_guanghua@csu.edu.cn. Tel. 0731-84327326  
30  
31  
32

33 17

1  
2  
3 **Abstract**

4  
5 **Objectives:** To examine the associations between serum magnesium (Mg)  
6  
7 concentration with the prevalence of metabolic syndrome (MetS), diabetes mellitus  
8  
9 (DM), hypertension (HP) and hyperuricemia (HU) in radiographic knee osteoarthritis  
10  
11 (OA) patients.

12  
13 **Methods:** The present study was conducted at the Health Management Center of  
14  
15 Xiangya Hospital. Radiographic OA was evaluated for patients aged over 40 years  
16  
17 with basic characteristics and blood biochemical assessment. Serum Mg concentration  
18  
19 was measured using the chemiluminescence method. MetS, DM, HP and HU were  
20  
21 diagnosed based on standard protocols. The associations between serum Mg  
22  
23 concentration with MetS, DM, HP and HU were evaluated by conducting  
24  
25 multivariable adjusted logistic regression.

26  
27 **Results:** A total of 962 radiographic knee OA patients were included. Compared with  
28  
29 the lowest quintile, the multivariable-adjusted odds ratios (ORs) and related 95%  
30  
31 confidence intervals (95%CI) of DM were 0.40 (95%CI 0.23-0.70, P=0.001), 0.33  
32  
33 (95%CI 0.18-0.60, P<0.001), 0.27 (95%CI 0.14-0.52, P<0.001) and 0.22 (95%CI  
34  
35 0.11-0.44, P<0.001) in the second, third, fourth and highest quintiles of serum Mg,  
36  
37 respectively (P for trend <0.001); the multivariable-adjusted ORs of HU were 0.33  
38  
39 (95%CI 0.19-0.59, P<0.001), 0.52 (95%CI 0.30-0.91, P=0.022) and 0.39 (95%CI  
40  
41 0.22-0.70, P=0.001) in the third, fourth and highest quintiles of serum Mg  
42  
43 respectively (P for trend <0.001); and the multivariable-adjusted ORs of MetS were  
44  
45 0.59 (95%CI 0.36-0.94, P=0.027) in the second and 0.56 (95%CI 0.34-0.93, P=0.024)  
46  
47 in the highest quintiles of serum Mg. However, the inverse association between serum  
48  
49 Mg and the prevalence of MetS was nonlinear (P for trend =0.067). There was no  
50  
51 significant association between serum Mg and HP in OA patients.

52  
53 **Conclusions:** The serum Mg concentration was inversely associated with the  
54  
55 prevalence of MetS, DM and HU in radiographic knee OA patients.

56  
57 **Level of Evidence:** Level III, cross-sectional study.

58  
59 **Key words:** osteoarthritis, magnesium, metabolic syndrome, diabetes, hypertension,  
60  
61 hyperuricemia

1  
2  
3 48 **Strengths and limitations of this study**  
4

- 5 49 1. This is the first study examining the associations between serum magnesium (Mg)  
6  
7 50 and the prevalence of metabolic syndrome, diabetes mellitus, hypertension and  
8  
9 51 hyperuricemia in radiographic knee osteoarthritis patients.  
10  
11 52 2. The multivariable logistical regression models in this study were adjusted for a  
12  
13 53 considerable number of potential confounding factors, which greatly improved the  
14  
15 54 reliability of the results.  
16  
17 55 3. The kidney is the key organ in maintaining Mg homeostasis. This study conducted  
18  
19 56 a sensitivity analysis by adding estimated glomerular filtration rate into the  
20  
21 57 multivariable logistic regression models, and the reverse associations remained  
22  
23 58 significant.  
24  
25 59 4. This study adopted cross-sectional design which precluded causal correlations.  
26  
27 60 5. Serum Mg concentration was adopted as the indicator of body Mg content in this  
28  
29 61 study which may not be the best indicator of body status.  
30  
31  
32  
33  
34  
35  
36  
37  
38  
39  
40  
41  
42  
43  
44  
45  
46  
47  
48  
49  
50  
51  
52  
53  
54  
55  
56  
57  
58  
59  
60  
62

## 63 **Introduction**

64 The association between osteoarthritis (OA) and metabolic diseases, especially  
65 metabolic syndrome (MetS)<sup>1 2</sup> and diabetes mellitus (DM),<sup>3-5</sup> has drawn increasing  
66 attention in the past few years. OA includes three specific phenotypes: metabolic OA,  
67 age-related OA and injury-related OA.<sup>6</sup> A large number of studies have indicated that  
68 the prevalence of MetS,<sup>7-9</sup> DM<sup>10-18</sup> and hypertension (HP)<sup>7 9-13 19 20</sup> is either higher in  
69 OA patients or associated with OA. In addition, some other studies reported that  
70 MetS,<sup>21 22</sup> DM<sup>23 24</sup> and HP<sup>21 22</sup> are risk factors of OA progression. Thus, it appears  
71 necessary to pay more attention and adopt appropriate measures to reduce the high  
72 prevalence of metabolic diseases in OA patients, which also seems to be beneficial in  
73 delaying OA progression.

74 Serum magnesium (Mg), one of the most important micronutrients for human  
75 health, has been reported to be negatively associated with MetS,<sup>25-29</sup> DM<sup>30-38</sup> and HP<sup>30</sup>  
76 <sup>39-41</sup> by lots of studies. Meanwhile, our previous study showed an inverse association  
77 between serum Mg and hyperuricemia (HU).<sup>42</sup> However, to the best knowledge of the  
78 authors, there is not yet a study examining the association between the serum Mg  
79 concentration and the aforementioned metabolic diseases (MetS, DM, HP and HU) in  
80 OA patients. On the other hand, we have previously shown that the serum Mg  
81 concentration may be inversely associated with radiographic knee OA.<sup>43</sup> Therefore,  
82 we speculate that the prevalence of MetS, DM, HP and HU in OA patients may be  
83 reduced by elevating the level of serum Mg, which can in turn delay OA progression.  
84 Thus, the objective of the present study was to examine the associations between the  
85 serum Mg concentration with the prevalence of MetS, DM, HP and HU in  
86 radiographic knee OA patients. It was hypothesized that serum Mg concentration was  
87 inversely associated with these diseases.

## 89 **Methods**

### 90 **Study population**

91 The present study was conducted at the Health Management Center of Xiangya  
92 Hospital between October 2013 and November 2014. The study design has been

1  
2  
3 93 published previously.<sup>42-46</sup> The protocol has been reviewed and approved by the Ethics  
4  
5 94 Committee of Xiangya Hospital, Central South University (reference numbers:  
6  
7 95 201312459), and the methods were developed in “accordance” with the approved  
8  
9 96 guidelines. Informed consent has been obtained from all participants. Registered  
10  
11 97 nurses were engaged to interview all participants during the examination using a  
12  
13 98 standard questionnaire, with the purpose to collect information on demographic  
14  
15 99 characteristics and health-related habits. Participants were selected based on the  
16  
17 100 following inclusion criteria: 1) 40 years old or above; 2) undergoing weight-bearing  
18  
19 101 bilateral anteroposterior radiography of the knee, and diagnosed with knee OA  
20  
21 102 according to the Kellgren-Lawrence (K-L) radiographic atlas (knee joint was graded  
22  
23 103 K-L 2 or above); 3) availability of all basic characteristics, including age, gender,  
24  
25 104 body mass index (BMI) and blood pressure; 4) availability of biochemical test results,  
26  
27 105 including serum Mg concentration; 5) availability of information related to the living  
28  
29 106 habits, including education background, activity level, smoking, drinking and  
30  
31 107 medication status. Initially, the present cross-sectional study retrieved 1820  
32  
33 108 radiographic knee OA patients aged over 40 years who exhibited sound basic  
34  
35 109 characteristics and required blood biochemical assessment (including serum Mg  
36  
37 110 concentration). Among them, 962 patients offered demographic characteristics and  
38  
39 111 health-related habits and were finally included in this study.

112

### 113 **Blood biochemistry**

114 All blood samples were drawn after a 12-hour overnight fast and were kept at 4°C  
115 until analysis. Blood tests were undertaken using the Beckman Coulter AU 5800  
116 (Beckman Coulter Inc., Brea, CA, USA). The inter- and intra-assay coefficients of  
117 variation were tested at both low concentrations (2.5 mmol/L for glucose, 118 µmol/L  
118 for uric acid and 0.60 mmol/L for serum Mg) and high concentrations (6.7 mmol/L for  
119 glucose, 472 µmol/L for uric acid and 1.00 mmol/L for serum Mg) of standard human  
120 samples. The intra-assay coefficients of variation were 0.98% (2.5 mmol/L) and 1.72%  
121 (6.7 mmol/L) for glucose, 1.39% (118 µmol/L) and 0.41% (472 µmol/L) for uric acid,  
122 and 1.86% (0.60 mmol/L) and 1.65% (1.00 mmol/L) for serum Mg respectively. The

1  
2  
3 123 inter-assay coefficients of variation were 2.45% (2.5 mmol/L) and 1.46% (6.7 mmol/L)  
4  
5 124 for glucose, 1.40% (118  $\mu\text{mol/L}$ ) and 1.23% (472  $\mu\text{mol/L}$ ) for uric acid, and 1.87%  
6  
7 125 (0.60 mmol/L) and 1.70% (1.00 mmol/L) for serum Mg respectively.  
8  
9 126

### 10 127 **Assessment of other exposures**

11  
12 128 Blood pressure was measured by an electronic sphygmomanometer. The weight and  
13  
14 129 height of each subject were measured respectively to calculate the BMI. Information  
15  
16 130 on the average frequency of physical activity (never, one to two times per week, three  
17  
18 131 to four times per week, five times and above per week) and average duration of  
19  
20 132 physical activity (less than half an hour, half an hour to one hour, one to two hours,  
21  
22 133 more than two hours) were collected through survey questionnaire. The smoking,  
23  
24 134 alcohol drinking and medication status were collected during the face-to-face  
25  
26 135 interview.  
27  
28 136

### 29 137 **Assessment of MetS, DM, HP and HU**

30  
31 138 MetS was diagnosed based on the Chinese Diabetes Society (CDS) criteria,<sup>47-49</sup> which  
32  
33 139 requires meeting at least 3 of the following 4 items: (1) BMI  $\geq 25$  kg/m<sup>2</sup>; (2) Fasting  
34  
35 140 plasma glucose (FPG)  $\geq 6.1$  mmol/L, or diagnosed DM; (3) Systolic blood pressure  
36  
37 141 (BP)  $\geq 140$  mmHg or diastolic BP  $\geq 90$  mmHg, or treatment of previously diagnosed  
38  
39 142 HP; (4) Triglycerides  $\geq 1.7$  mmol/L and/or HDL-cholesterol  $< 0.9$  mmol/L in male or  
40  
41 143  $< 1.0$  mmol/L in female, or treatment for this lipid abnormality. Subjects with the  
42  
43 144 fasting glucose  $\geq 7.0$  mmol/L or currently undergoing drug treatment for blood glucose  
44  
45 145 control were regarded as DM patients, and subjects with the systolic blood pressure  
46  
47 146  $\geq 140$  mm Hg or diastolic blood pressure  $\geq 90$  mm Hg or currently undertaking  
48  
49 147 antihypertensive medication were regarded as HP patients. HU was defined as uric  
50  
51 148 acid  $\geq 416$   $\mu\text{mol/L}$  for male and  $\geq 360$   $\mu\text{mol/L}$  for female or currently undergoing drug  
52  
53 149 treatment for uric acid control.  
54  
55 150

### 56 151 **Statistical analysis**

57 152 The continuous data were expressed as mean with standard deviation, and the



1  
2  
3 153 category data were expressed in percentage. Differences in continuous data were  
4  
5 154 evaluated by one-way classification ANOVA (normally distributed data) or  
6  
7 155 Kruskal-Wallis H test (non-normally distributed data), while differences in category  
8  
9 156 data were assessed by the  $\chi^2$  test. The serum Mg was classified into five categories  
10  
11 157 based on the quintile distribution:  $\leq 0.85$ , 0.86-0.89, 0.90-0.92, 0.93-0.96 and  $\geq 0.97$   
12  
13 158 mmol/L. The prevalence of MetS, DM, HP and HU in each quintile of serum Mg in  
14  
15 159 OA patients were assessed by scatter plots.

16  
17 160 Logistic regression was conducted to calculate the odds ratios (ORs) with 95%  
18  
19 161 confidence intervals (95%CI) for the associations between serum Mg and MetS, DM,  
20  
21 162 HP and HU. Specifically, model 1 was adjusted by covariates of age (continuous data)  
22  
23 163 and gender (male, female). Then, model 2 was adjusted by additional covariates of  
24  
25 164 BMI (continuous data), educational level (high school or above, lower than high  
26  
27 165 school), smoking status (yes, no), activity level (continuous data), alcohol drinking  
28  
29 166 status (yes, no), HP (yes, no), DM (yes, no), and dyslipidemia (yes, no) on the basis of  
30  
31 167 model 1. Dyslipidemia was defined as triglycerides  $\geq 1.7$  mmol/L and/or  
32  
33 168 HDL-cholesterol  $< 0.9$  mmol/L in male or  $< 1.0$  mmol/L in female, or treatment for this  
34  
35 169 lipid abnormality. Notably, the selection of covariates in model 2 varied slightly for  
36  
37 170 examining different associations (between serum Mg and MetS, DM, HP or HU). For  
38  
39 171 example, BMI, HP and dyslipidemia were adjusted for the association between serum  
40  
41 172 Mg and DM, but not for the association between serum Mg and MetS, simply because  
42  
43 173 MetS was diagnosed based on BMI, HP and dyslipidemia status. Model 3 was  
44  
45 174 established based on model 2, with adjustment of an additional covariate, estimated  
46  
47 175 glomerular filtration rate (eGFR). eGFR (continuous data) was calculated from the  
48  
49 176 Chronic Kidney Disease Epidemiology Collaboration equation.<sup>50</sup> All covariates in the  
50  
51 177 present study were chosen referring to some of the previous similar studies.<sup>27 33 51 52</sup>  
52  
53 178 Tests for linear trends were conducted based on logistic regression using a median  
54  
55 179 variable of Mg concentration in each category.

56  
57 180 Scatter plots were plotted using R 3.4.4.<sup>53</sup> Other data analyses were performed  
58  
59 181 using SPSS 17.0;  $P \leq 0.05$  was considered to be statistically significant. All tests were  
60  
182 two tailed.

1  
2  
3 1834  
5 184 **Patient and public involvement**6  
7 185 No patients were involved in setting the research question or the outcome measures,  
8  
9 186 nor were they involved in the design or implementation of the study. There were no  
10  
11 187 plans to disseminate the results of the research to study participants.

12 188

13  
14 189 **Results**15  
16 190 A total of 962 subjects (377 females, accounting for 39.2%) were included in the  
17  
18 191 present cross-sectional study. The characteristics of the study population according to  
19  
20 192 quintiles of serum Mg were presented in Table 1. The mean age of the subjects was  
21  
22 193 54.9±7.6 years old. The overall prevalence of MetS, DM, HP and HU in OA patients  
23  
24 194 were 21.4%, 12.0%, 38.5% and 18.3% respectively. Significant differences were  
25  
26 195 observed across the quintiles of serum Mg for fasting glucose, as well as the  
27  
28 196 prevalence of DM and HU.29  
30 197 The prevalence of MetS in each quintile of serum Mg in OA patients was shown  
31  
32 198 in Figure 1 (A). The outcomes of multivariable adjusted associations between MetS  
33  
34 199 and serum Mg concentration were shown in Table 2. Compared with the lowest  
35  
36 200 quintile, the age-gender adjusted ORs (Model 1) suggested significant decreased  
37  
38 201 prevalence of MetS in the second (OR=0.61, 95%CI 0.38-0.97, P=0.038) and the  
39  
40 202 highest (OR=0.59, 95%CI 0.36-0.96, P=0.035) quintiles of serum Mg; the  
41  
42 203 multivariable adjusted ORs (Model 2) also suggested significant decreased prevalence  
43  
44 204 of MetS in the second (OR=0.60, 95%CI 0.37-0.96, P=0.035) and the highest  
45  
46 205 (OR=0.61, 95%CI 0.37-0.99, P=0.047) quintiles. The sensitivity analysis, by adding  
47  
48 206 eGFR into model 2, also reached similar results - significant lower prevalence of  
49  
50 207 MetS in the second (OR=0.59, 95%CI 0.36-0.94, P=0.027) and the highest quintiles  
51  
52 208 (OR=0.56, 95%CI 0.34-0.93, P=0.024) compared with the reference quintile of serum  
53  
54 209 Mg. No clear trend was evident in the third and fourth quintiles of serum Mg. The P  
55  
56 210 for trend were 0.090 (Model 1), 0.120 (Model 2), 0.067 (Model 3), respectively.57  
58 211 Figure 1 (B) showed the prevalence of DM in each category of serum Mg in OA  
59  
60 212 patients. Table 3 illustrated the multivariable adjusted relations between serum Mg

1  
2  
3 213 and DM in OA patients. Both the age-gender adjusted OR values (Model 1) and the  
4  
5 214 multivariable adjusted OR values (Model 2) suggested a strong inverse association  
6  
7 215 between serum Mg and DM. The age-gender adjusted ORs for the prevalence of DM  
8  
9 216 were 0.38 (95%CI 0.22-0.66, P=0.001), 0.34 (95%CI 0.19-0.61, P<0.001), 0.29  
10  
11 217 (95%CI 0.15-0.55, P<0.001), and 0.20 (95%CI 0.10-0.40, P<0.001) in the second,  
12  
13 218 third, fourth and fifth quintiles of serum Mg respectively, and the P for trend was  
14  
15 219 <0.001. The multivariable adjusted ORs for the prevalence of DM were 0.40 (95%CI  
16  
17 220 0.23-0.70, P=0.001), 0.32 (95%CI 0.18-0.59, P<0.001), 0.26 (95%CI 0.13-0.50,  
18  
19 221 P<0.001), and 0.21 (95%CI 0.11-0.42, P<0.001) in the second, third, fourth and fifth  
20  
21 222 quintiles of serum Mg respectively, and the P for trend was <0.001. The sensitivity  
22  
23 223 analysis, by adding eGFR into model 2, showed similar results - significant lower  
24  
25 224 prevalence of DM in the second (OR=0.40, 95%CI 0.23-0.70, P=0.001), third  
26  
27 225 (OR=0.33, 95%CI 0.18-0.60, P<0.001), fourth (OR=0.27, 95%CI 0.14-0.52, P<0.001),  
28  
29 226 and highest quintiles (OR=0.22, 95%CI 0.11-0.44, P<0.001) compared with the  
30  
31 227 reference quintile of serum Mg, and the P for trend was <0.001.

32  
33 228 The prevalence of HP in each quintile of serum Mg in OA patients was depicted  
34  
35 229 in Figure 1 (C). The multivariable-adjusted relations between serum Mg and HP in  
36  
37 230 OA patients were illustrated in Table 4. According to both the age-gender adjusted  
38  
39 231 ORs (Model 1) and the multivariable adjusted ORs (Model 2), there was no  
40  
41 232 significant association between serum Mg and HP, and the P for trend were 0.929 and  
42  
43 233 0.377, respectively. The sensitivity analysis, by adding eGFR into model 2, reached  
44  
45 234 the same results.

46  
47 235 The prevalence of HU in each category of serum Mg in OA patients was shown  
48  
49 236 in Figure 1 (D). The multivariable-adjusted relations between serum Mg and HU in  
50  
51 237 OA patients were illustrated in Table 5. Both the age-gender adjusted OR values  
52  
53 238 (Model 1) and the multivariable adjusted OR values (Model 2) suggested significant  
54  
55 239 decreased prevalence of HU in the third quintile (age-gender adjusted OR=0.44,  
56  
57 240 95%CI 0.26-0.75, P=0.002; multivariable adjusted OR=0.38, 95%CI 0.22-0.67,  
58  
59 241 P=0.001) and fifth quintile (age-gender adjusted OR=0.51, 95%CI 0.30-0.85, P=0.010;  
60  
242 multivariable adjusted OR=0.50, 95%CI 0.29-0.87, P=0.013) compared with the

1  
2  
3 243 lowest quintile of serum Mg, and the P for trend were 0.008 and 0.006, respectively.  
4  
5 244 The sensitivity analysis, by adding eGFR into model 2, showed similar outcomes -  
6  
7 245 significant lower prevalence of HU in the third (OR=0.33, 0.19-0.59, P<0.001), fourth  
8  
9 246 (OR=0.52, 95%CI 0.30-0.91, P=0.022), and highest quintiles (OR=0.39, 95%CI  
10  
11 247 0.22-0.70, P=0.001) compared with the reference quintile of serum Mg, and the P for  
12  
13 248 trend was <0.001.

14  
15 249

## 16 250 **Discussion**

17  
18 251 The results of this study suggested that the serum Mg concentration was negatively  
19  
20 252 associated with the prevalence of MetS, DM and HU in subjects with radiographic  
21  
22 253 knee OA. To control potential confounders, several covariates including  
23  
24 254 characteristics, living habits and underlying diseases were selected, and even the  
25  
26 255 eGFR was added into the multivariable logistic regression models to eliminate the  
27  
28 256 influence of renal function on Mg excretion. The reverse associations mentioned  
29  
30 257 above remained significant after adjustments of these confounders. However, the  
31  
32 258 association between serum Mg and the prevalence of MetS was nonlinear, with no  
33  
34 259 clear trend in the third and fourth quintiles of serum Mg. Moreover, the negative  
35  
36 260 association between serum Mg and the prevalence of HP was not observed in  
37  
38 261 radiographic knee OA patients.

39  
40 262 Mg, the fourth most abundant cation in human body and the second most profuse  
41  
42 263 intracellular cation, is a metallic cofactor for over 300 enzymatic reactions. It appears  
43  
44 264 to play an important role in glucose metabolism and insulin homeostasis, which are  
45  
46 265 both highly correlated with metabolic diseases, especially MetS and DM. The  
47  
48 266 mechanisms involved in Mg deficiency in patients with MetS, DM and HU are  
49  
50 267 probably multifactorial. The most important factor may be insulin resistance, as Mg is  
51  
52 268 essential for insulin action and is a critical cofactor for several enzymes in  
53  
54 269 carbohydrate metabolism, which is important for the phosphorylation reactions of  
55  
56 270 tyrosine-kinase in the insulin receptor.<sup>31 54-58</sup> Of course, it is necessary to highlight the  
57  
58 271 fact that insulin can also induce Mg excretion<sup>59</sup> and produce a significant decline of  
59  
60 272 plasma Mg through ion exchange.<sup>60</sup> Thus, there seems to be a vicious circle between

1  
2  
3 273 Mg deficiency and insulin resistance.

4  
5 274 Other potential mechanisms include glucose transportation,<sup>57</sup> oxidative stress<sup>57</sup>  
6  
7 275 and inflammatory cytokines,<sup>61-63</sup> and cellular calcium homeostasis.<sup>55</sup> Mg is an  
8  
9 276 essential cofactor of the high-energy phosphate-bound enzymatic pathways involved  
10  
11 277 in the modulation of glucose transport across cell membranes.<sup>57</sup> It also plays a role in  
12  
13 278 the mechanisms of cellular antioxidant defense.<sup>64</sup> The oxidative stress, defined as a  
14  
15 279 persistent imbalance between the excessive production of reactive oxygen species  
16  
17 280 and/or defects in antioxidant defense, has been implicated in the pathogenesis of  
18  
19 281 diabetic complications.<sup>57</sup> Moreover, low serum Mg levels are strongly related to  
20  
21 282 elevated serum concentrations of both tumor necrosis factor alpha and C-reactive  
22  
23 283 protein (CRP),<sup>65</sup> suggesting that Mg deficiency may contribute to the development of  
24  
25 284 low-grade chronic inflammation syndrome and the development of glucose metabolic  
26  
27 285 disorders through the former pathway. In addition, lower Mg concentration can  
28  
29 286 enhance calcium-mediated vasoconstriction, blunt cardiac and smooth muscle  
30  
31 287 relaxation, and thus contribute to BP elevation.<sup>55</sup> However, the decreased serum  
32  
33 288 calcium concentration in radiographic knee OA patients may weaken the association  
289 between Mg and HP.<sup>66</sup>

34  
35 290 MetS<sup>21 22</sup> and DM<sup>4 23 24</sup> were reported to be the risk factors of OA progression.  
36  
37 291 Moreover, serum Mg level has been proved to be significantly associated with the  
38  
39 292 CRP concentration,<sup>27 67-69</sup> and higher CRP might serve as a prediction factor for OA  
40  
41 293 progression.<sup>70 71</sup> Thus, OA progression may be delayed by elevating the serum Mg  
42  
43 294 level through reducing the prevalence of MetS and DM and decreasing the level of  
44  
45 295 CRP. Above all, the present study indicated that the elevation of serum Mg level has  
46  
47 296 the potential to reduce the prevalence of MetS, DM and HU in knee OA patients and  
48  
49 297 thereby may delay the progression of knee OA. However, the specific mechanism  
50  
51 298 needs to be further explored.

52  
53 299 The present study has several strengths. Firstly, this is the first study examining  
54  
55 300 the associations between serum Mg and the prevalence of MetS, DM, HP and HU in  
56  
57 301 radiographic knee OA patients. The results of this study will provide a new insight  
58  
59 302 into the treatment of knee OA. Secondly, the multivariable logistical regression

1  
2  
3 303 models were adjusted for a considerable number of potential confounding factors,  
4  
5 304 which greatly improved the reliability of the results. Thirdly, the kidney is the key  
6  
7 305 organ in maintaining Mg homeostasis. This study conducted a sensitivity analysis by  
8  
9 306 adding eGFR into multivariable logistic regression models which showed that the  
10  
11 307 reverse associations remained significant.

12  
13 308 Limitations of the present study should also be admitted. The cross-sectional  
14  
15 309 design precludes causal correlations, so further prospective studies and intervention  
16  
17 310 trials should be undertaken to establish a causal association between serum Mg with  
18  
19 311 the prevalence of MetS, DM, HP and HU in radiographic knee OA patients. Since no  
20  
21 312 previous research investigated such associations in knee OA patients, the value of this  
22  
23 313 study should not be blotted out by the cross-sectional nature. Another limitation of  
24  
25 314 this study lies in the relatively small sample size, and thus, extensive high-quality  
26  
27 315 researches based on a larger sample are needed. Moreover, the dietary intake of Mg in  
28  
29 316 relation to the prevalence of MetS, DM, HP and HU were not assessed in the present  
30  
31 317 study. Last but not the least, it is important to highlight that Mg is an intracellular ion;  
32  
33 318 therefore, the serum Mg concentration must be considered as a poor indicator of body  
34  
35 319 Mg content,<sup>72</sup> even though it has been used in many studies. However, blood Mg level  
36  
37 320 is the second best indicator of body status.<sup>73</sup>

38  
39

## 322 **Conclusions**

40 323 The present study concluded that the serum Mg concentration was inversely  
41  
42 324 associated with the prevalence of MetS, DM and HU in radiographic knee OA  
43  
44 325 patients.

45 326  
46  
47  
48  
49  
50  
51  
52  
53  
54  
55  
56  
57  
58  
59  
60

1  
2  
3 327 **Contributors**  
4

5 328 All authors had full access to the data in the study and take responsibility for the  
6  
7 329 integrity of the data and the accuracy of the data analysis. GHL, YLW and JW  
8  
9 330 conceived the study. GHL, YLW and JW were responsible for conception and design  
10  
11 331 of the study and drafted the manuscript. CZ, TY, HL, YC and DXX contributed to  
12  
13 332 data collection. WJ contributed to preparation and data analysis. BX, ZCL, JTL, and  
14  
15 333 SDJ contributed to study retrieval. GHL and YLW contributed to revision of the  
16  
17 334 manuscript. All the authors contributed to the interpretation of the data and critically  
18  
19 335 reviewed the manuscript for publication.  
20

21 336  
22 337 **Funding**

23 338 This work was supported by the Innovation Foundation of the Central South  
24  
25 339 University for Postgraduate (2018zzts045), the Postdoctoral Science Foundation of  
26  
27 340 Central South University (182130), the National Natural Science Foundation of China  
28  
29 341 (No. 81201420, 81272034, 81472130, 81501923), the Provincial Science Foundation  
30  
31 342 of Hunan (No. 14JJ3032), the Scientific Research Project of the Development and  
32  
33 343 Reform Commission of Hunan Province ([2013]1199), the Scientific Research Project  
34  
35 344 of Science and Technology Office of Hunan Province (2013SK2018), the Doctoral  
36  
37 345 Scientific Fund Project of the Ministry of Education of China (20120162110036).  
38

39 346  
40 347 **Competing interests**

41 348 The authors declare that they have no conflict of interest.  
42  
43 349

44  
45 350 **Ethics approval**

46  
47 351 The protocol of this study was reviewed and approved by the Ethics Committee at  
48  
49 352 Xiangya Hospital.  
50

51 353  
52 354 **Data sharing statement**

53  
54 355 The datasets during the current study available from the corresponding author on  
55  
56 356 reasonable request.  
57



1  
2  
3 3574 358 **REFERENCE**

- 5 359 1 Zhuo Q, Yang W, Chen J, *et al.* Metabolic syndrome meets osteoarthritis. *Nat*  
6 360 *Rev Rheumatol* 2012;8(12):729-37.
- 7  
8  
9 361 2 Katz JD, Agrawal S, Velasquez M. Getting to the heart of the matter:  
10 362 osteoarthritis takes its place as part of the metabolic syndrome. *Curr Opin*  
11 363 *Rheumatol* 2010;22(5):512-9.
- 12  
13 364 3 Berenbaum F. Diabetes-induced osteoarthritis: from a new paradigm to a new  
14 365 phenotype. *Ann Rheum Dis* 2011;70(8):1354-6.
- 15  
16 366 4 King KB, Rosenthal AK. The adverse effects of diabetes on osteoarthritis: update  
17 367 on clinical evidence and molecular mechanisms. *Osteoarthritis Cartilage*  
18 368 2015;23(6):841-50.
- 19  
20 369 5 Kirkman MS. Osteoarthritis progression: is diabetes a culprit? *Osteoarthritis*  
21 370 *Cartilage* 2015;23(6):839-40.
- 22  
23 371 6 Sellam J, Berenbaum F. Is osteoarthritis a metabolic disease? *Joint Bone Spine*  
24 372 2013;80(6):568-73.
- 25  
26 373 7 Puenpatom RA, Victor TW. Increased prevalence of metabolic syndrome in  
27 374 individuals with osteoarthritis: an analysis of NHANES III data. *Postgrad Med*  
28 375 2009;121(6):9-20.
- 29  
30 376 8 Shin D. Association between metabolic syndrome, radiographic knee  
31 377 osteoarthritis, and intensity of knee pain: results of a national survey. *J Clin*  
32 378 *Endocrinol Metab* 2014;99(9):3177-83.
- 33  
34 379 9 Calvet J, Orellana C, Larrosa M, *et al.* High prevalence of cardiovascular  
35 380 co-morbidities in patients with symptomatic knee or hand osteoarthritis. *Scand J*  
36 381 *Rheumatol* 2015:1-4.
- 37  
38 382 10 Rahman MM, Kopec JA, Cibere J, *et al.* The relationship between osteoarthritis  
39 383 and cardiovascular disease in a population health survey: a cross-sectional study.  
40 384 *BMJ Open* 2013;3(5):e2624.
- 41  
42 385 11 Inoue R, Ishibashi Y, Tsuda E, *et al.* Medical problems and risk factors of  
43 386 metabolic syndrome among radiographic knee osteoarthritis patients in the



- 1  
2  
3 387 Japanese general population. *J Orthop Sci* 2011;16(6):704-9.
- 4  
5 388 12 Hart DJ, Doyle DV, Spector TD. Association between metabolic factors and knee  
6  
7 389 osteoarthritis in women: the Chingford Study. *J Rheumatol* 1995;22(6):1118-23.
- 8  
9 390 13 Jungmann PM, Kraus MS, Alizai H, *et al.* Association of metabolic risk factors  
10  
11 391 with cartilage degradation assessed by T2 relaxation time at the knee: data from  
12  
13 392 the osteoarthritis initiative. *Arthritis Care Res (Hoboken)* 2013;65(12):1942-50.
- 14  
15 393 14 Anagnostopoulos I, Zinzaras E, Alexiou I, *et al.* The prevalence of rheumatic  
16  
17 394 diseases in central Greece: a population survey. *BMC Musculoskelet Disord*  
18  
19 395 2010;11:98.
- 20  
21 396 15 Massengale M, Reichmann WM, Losina E, *et al.* The relationship between hand  
22  
23 397 osteoarthritis and serum leptin concentration in participants of the Third National  
24  
25 398 Health and Nutrition Examination Survey. *Arthritis Res Ther* 2012;14(3):R132.
- 26  
27 399 16 Nieves-Plaza M, Castro-Santana LE, Font YM, *et al.* Association of hand or knee  
28  
29 400 osteoarthritis with diabetes mellitus in a population of Hispanics from Puerto  
30  
31 401 Rico. *J Clin Rheumatol* 2013;19(1):1-6.
- 32  
33 402 17 Greiver M, Williamson T, Barber D, *et al.* Prevalence and epidemiology of  
34  
35 403 diabetes in Canadian primary care practices: a report from the Canadian Primary  
36  
37 404 Care Sentinel Surveillance Network. *Can J Diabetes* 2014;38(3):179-85.
- 38  
39 405 18 Rahman MM, Cibere J, Anis AH, *et al.* Risk of Type 2 Diabetes among  
40  
41 406 Osteoarthritis Patients in a Prospective Longitudinal Study. *Int J Rheumatol*  
42  
43 407 2014;2014:620920.
- 44  
45 408 19 Reid JL, Morton DJ, Wingard DL, *et al.* Obesity and other cardiovascular disease  
46  
47 409 risk factors and their association with osteoarthritis in Southern California  
48  
49 410 American Indians, 2002-2006. *Ethn Dis* 2010;20(4):416-22.
- 50  
51 411 20 Birtwhistle R, Morkem R, Peat G, *et al.* Prevalence and management of  
52  
53 412 osteoarthritis in primary care: an epidemiologic cohort study from the Canadian  
54  
55 413 Primary Care Sentinel Surveillance Network. *CMAJ Open* 2015;3(3):E270-5.
- 56  
57 414 21 Yoshimura N, Muraki S, Oka H, *et al.* Accumulation of metabolic risk factors  
58  
59 415 such as overweight, hypertension, dyslipidaemia, and impaired glucose tolerance  
60 416 raises the risk of occurrence and progression of knee osteoarthritis: a 3-year

- 1  
2  
3 417 follow-up of the ROAD study. *Osteoarthritis Cartilage* 2012;20(11):1217-26.  
4  
5 418 22 Monira HS, Wang Y, Cicuttini FM, *et al.* Incidence of total knee and hip  
6  
7 419 replacement for osteoarthritis in relation to the metabolic syndrome and its  
8  
9 420 components: a prospective cohort study. *Semin Arthritis Rheum*  
10  
11 421 2014;43(4):429-36.  
12  
13 422 23 Schett G, Kleyer A, Perricone C, *et al.* Diabetes is an independent predictor for  
14  
15 423 severe osteoarthritis: results from a longitudinal cohort study. *Diabetes Care*  
16  
17 424 2013;36(2):403-9.  
18  
19 425 24 Eymard F, Parsons C, Edwards MH, *et al.* Diabetes is a risk factor for knee  
20  
21 426 osteoarthritis progression. *Osteoarthritis Cartilage* 2015;23(6):851-9.  
22  
23 427 25 Guerrero-Romero F, Rodriguez-Moran M. Low serum magnesium levels and  
24  
25 428 metabolic syndrome. *Acta Diabetol* 2002;39(4):209-13.  
26  
27 429 26 Guerrero-Romero F, Rodriguez-Moran M. Hypomagnesemia, oxidative stress,  
28  
29 430 inflammation, and metabolic syndrome. *Diabetes Metab Res Rev*  
30  
31 431 2006;22(6):471-6.  
32  
33 432 27 Evangelopoulos AA, Vallianou NG, Panagiotakos DB, *et al.* An inverse  
34  
35 433 relationship between cumulating components of the metabolic syndrome and  
36  
37 434 serum magnesium levels. *Nutr Res* 2008;28(10):659-63.  
38  
39 435 28 Hjelmessaeth J, Hofso D, Aasheim ET, *et al.* Parathyroid hormone, but not  
40  
41 436 vitamin D, is associated with the metabolic syndrome in morbidly obese women  
42  
43 437 and men: a cross-sectional study. *Cardiovasc Diabetol* 2009;8:7.  
44  
45 438 29 Lima ML, Cruz T, Rodrigues LE, *et al.* Serum and intracellular magnesium  
46  
47 439 deficiency in patients with metabolic syndrome--evidences for its relation to  
48  
49 440 insulin resistance. *Diabetes Res Clin Pract* 2009;83(2):257-62.  
50  
51 441 30 Ma J, Folsom AR, Melnick SL, *et al.* Associations of serum and dietary  
52  
53 442 magnesium with cardiovascular disease, hypertension, diabetes, insulin, and  
54  
55 443 carotid arterial wall thickness: the ARIC study. Atherosclerosis Risk in  
56  
57 444 Communities Study. *J Clin Epidemiol* 1995;48(7):927-40.  
58  
59 445 31 Kao WH, Folsom AR, Nieto FJ, *et al.* Serum and dietary magnesium and the risk  
60  
446 for type 2 diabetes mellitus: the Atherosclerosis Risk in Communities Study.

- 1  
2  
3 447 *Arch Intern Med* 1999;159(18):2151-9.
- 4  
5 448 32 Wang JL, Shaw NS, Yeh HY, *et al.* Magnesium status and association with  
6  
7 449 diabetes in the Taiwanese elderly. *Asia Pac J Clin Nutr* 2005;14(3):263-9.
- 8  
9 450 33 Chambers EC, Heshka S, Gallagher D, *et al.* Serum magnesium and type-2  
10  
11 451 diabetes in African Americans and Hispanics: a New York cohort. *J Am Coll*  
12  
13 452 *Nutr* 2006;25(6):509-13.
- 14  
15 453 34 Simmons D, Joshi S, Shaw J. Hypomagnesaemia is associated with diabetes: Not  
16  
17 454 pre-diabetes, obesity or the metabolic syndrome. *Diabetes Res Clin Pract*  
18  
19 455 2010;87(2):261-6.
- 20  
21 456 35 Sales CH, Pedrosa LF, Lima JG, *et al.* Influence of magnesium status and  
22  
23 457 magnesium intake on the blood glucose control in patients with type 2 diabetes.  
24  
25 458 *Clin Nutr* 2011;30(3):359-64.
- 26  
27 459 36 Lecube A, Baena-Fustegueras JA, Fort JM, *et al.* Diabetes is the main factor  
28  
29 460 accounting for hypomagnesemia in obese subjects. *PLoS One* 2012;7(1):e30599.
- 30  
31 461 37 Xu J, Xu W, Yao H, *et al.* Associations of serum and urinary magnesium with the  
32  
33 462 pre-diabetes, diabetes and diabetic complications in the Chinese Northeast  
34  
35 463 population. *PLoS One* 2013;8(2):e56750.
- 36  
37 464 38 Yang SJ, Hwang SY, Baik SH, *et al.* Serum magnesium level is associated with  
38  
39 465 type 2 diabetes in women with a history of gestational diabetes mellitus: the  
40  
41 466 Korea National Diabetes Program study. *J Korean Med Sci* 2014;29(1):84-9.
- 42  
43 467 39 Singh RB, Rastogi V, Niaz MA, *et al.* Epidemiological study of magnesium  
44  
45 468 status and risk of hypertension in a rural population of north India. *Magnes Res*  
46  
47 469 1996;9(3):173-81.
- 48  
49 470 40 Peacock JM, Folsom AR, Arnett DK, *et al.* Relationship of serum and dietary  
50  
51 471 magnesium to incident hypertension: the Atherosclerosis Risk in Communities  
52  
53 472 (ARIC) Study. *Ann Epidemiol* 1999;9(3):159-65.
- 54  
55 473 41 Guerrero-Romero F, Rodriguez-Moran M, Hernandez-Ronquillo G, *et al.* Low  
56  
57 474 Serum Magnesium Levels and Its Association with High Blood Pressure in  
58  
59 475 Children. *J Pediatr* 2016;168:93-8.
- 60 476 42 Zeng C, Wang YL, Wei J, *et al.* Association between low serum magnesium

- 1  
2  
3 477 concentration and hyperuricemia. *Magnes Res* 2015;28(2):56-63.
- 4  
5 478 43 Zeng C, Wei J, Li H, *et al.* Relationship between Serum Magnesium  
6  
7 479 Concentration and Radiographic Knee Osteoarthritis. *J Rheumatol*  
8  
9 480 2015;42(7):1231-6.
- 10  
11 481 44 Wei J, Zeng C, Gong QY, *et al.* Associations between Dietary Antioxidant Intake  
12  
13 482 and Metabolic Syndrome. *PLoS One* 2015;10(6):e130876.
- 14  
15 483 45 Xie DX, Xiong YL, Zeng C, *et al.* Association between low dietary zinc and  
16  
17 484 hyperuricaemia in middle-aged and older males in China: a cross-sectional study.  
18  
19 485 *BMJ Open* 2015;5(10):e8637.
- 20  
21 486 46 Wei J, Zeng C, Gong QY, *et al.* The association between dietary selenium intake  
22  
23 487 and diabetes: a cross-sectional study among middle-aged and older adults. *Nutr J*  
24  
25 488 2015;14:18.
- 26  
27 489 47 Expert Panel on Metabolic Syndrome of Chinese Diabetes Society:  
28  
29 490 Recommendations on metabolic syndrome of Chinese Diabetes Society (Chinese).  
30  
31 491 *Chin J Diabetes* 2004;14:156-61.
- 32  
33 492 48 Pang C, Jia L, Hou X, *et al.* The significance of screening for microvascular  
34  
35 493 diseases in Chinese community-based subjects with various metabolic  
36  
37 494 abnormalities. *PLoS One* 2014;9(5):e97928.
- 38  
39 495 49 Zhou H, Guo ZR, Yu LG, *et al.* Evidence on the applicability of the ATPIII, IDF  
40  
41 496 and CDS metabolic syndrome diagnostic criteria to identify CVD and T2DM in  
42  
43 497 the Chinese population from a 6.3-year cohort study in mid-eastern China.  
44  
45 498 *Diabetes Res Clin Pract* 2010;90(3):319-25.
- 46  
47 499 50 Levey AS, Stevens LA, Schmid CH, *et al.* A new equation to estimate glomerular  
48  
49 500 filtration rate. *Ann Intern Med* 2009;150(9):604-12.
- 50  
51 501 51 Joosten MM, Gansevoort RT, Mukamal KJ, *et al.* Urinary magnesium excretion  
52  
53 502 and risk of hypertension: the prevention of renal and vascular end-stage disease  
54  
55 503 study. *Hypertension* 2013;61(6):1161-7.
- 56  
57 504 52 Choi MK, Bae YJ. Association of Magnesium Intake with High Blood Pressure  
58  
59 505 in Korean Adults: Korea National Health and Nutrition Examination Survey  
60  
506 2007-2009. *PLoS One* 2015;10(6):e130405.

- 1  
2  
3 507 53 R Development Core Team. R: A Language and Environment for Statistical  
4 Computing, Vienna, Austria: R Foundation for Statistical Computing. 2016.  
5 508  
6  
7 509 54 Grundy SM, Cleeman JI, Daniels SR, *et al.* Diagnosis and management of the  
8 metabolic syndrome: an American Heart Association/National Heart, Lung, and  
9 Blood Institute Scientific Statement. *Circulation* 2005;112(17):2735-52.  
10 510  
11 511  
12 512 55 Barbagallo M, Dominguez LJ, Galioto A, *et al.* Role of magnesium in insulin  
13 action, diabetes and cardio-metabolic syndrome X. *Mol Aspects Med*  
14 513  
15 2003;24(1-3):39-52.  
16 514  
17  
18 515 56 Song Y, Ridker PM, Manson JE, *et al.* Magnesium intake, C-reactive protein, and  
19 the prevalence of metabolic syndrome in middle-aged and older U.S. women.  
20 516  
21 517 *Diabetes Care* 2005;28(6):1438-44.  
22  
23 518 57 Guerrero-Romero F, Rodriguez-Moran M. Complementary therapies for diabetes:  
24 the case for chromium, magnesium, and antioxidants. *Arch Med Res*  
25 519  
26 2005;36(3):250-7.  
27 520  
28  
29 521 58 Huerta MG, Roemmich JN, Kington ML, *et al.* Magnesium deficiency is  
30 associated with insulin resistance in obese children. *Diabetes Care*  
31 522  
32 2005;28(5):1175-81.  
33 523  
34 524 59 Djurhuus MS, Skott P, Hother-Nielson O, *et al.* Insulin increases renal  
35 magnesium excretion: a possible cause of magnesium depletion in  
36 hyperinsulinaemic states. *Diabet Med* 1995;12(8):664-9.  
37 525  
38 526  
39 527 60 Paolisso G, Sgambato S, Passariello N, *et al.* Insulin induces opposite changes in  
40 plasma and erythrocyte magnesium concentrations in normal man. *Diabetologia*  
41 528  
42 1986;29(9):644-7.  
43 529  
44  
45 530 61 Bonora E, Targher G, Zenere MB, *et al.* Relationship of uric acid concentration to  
46 cardiovascular risk factors in young men. Role of obesity and central fat  
47 531  
48 distribution. The Verona Young Men Atherosclerosis Risk Factors Study. *Int J*  
49 532  
50 533 *Obes Relat Metab Disord* 1996;20(11):975-80.  
51  
52 534 62 Lyngdoh T, Marques-Vidal P, Paccaud F, *et al.* Elevated serum uric acid is  
53 associated with high circulating inflammatory cytokines in the population-based  
54 535  
55 Colaous study. *PLoS One* 2011;6(5):e19901.  
56 536

- 1  
2  
3 537 63 Kirilmaz B, Asgun F, Alioglu E, *et al.* High inflammatory activity related to the  
4 538 number of metabolic syndrome components. *J Clin Hypertens (Greenwich)*  
5 2010;12(2):136-44.  
6  
7 539  
8  
9 540 64 Salmonowicz B, Krzystek-Korpacka M, Noczynska A. Trace elements,  
10 541 magnesium, and the efficacy of antioxidant systems in children with type 1  
11 542 diabetes mellitus and in their siblings. *Adv Clin Exp Med* 2014;23(2):259-68.  
12  
13 543 65 Rodríguez-Morán M, Guerrero-Romero F. Elevated serum concentration of  
14 544 tumor necrosis factor-alpha is linked to low serum magnesium levels in the  
15 545 obesity-related inflammatory response. *Magnes Res* 2004;17:189-96.  
16  
17 546 66 Li H, Zeng C, Wei J, *et al.* Serum Calcium Concentration Is Inversely Associated  
18 547 With Radiographic Knee Osteoarthritis: A Cross-Sectional Study. *Medicine*  
19 548 (*Baltimore*) 2016;95(6):e2838.  
20  
21 549 67 Chacko SA, Song Y, Nathan L, *et al.* Relations of dietary magnesium intake to  
22 550 biomarkers of inflammation and endothelial dysfunction in an ethnically diverse  
23 551 cohort of postmenopausal women. *Diabetes Care* 2010;33(2):304-10.  
24  
25 552 68 Bo S, Durazzo M, Guidi S, *et al.* Dietary magnesium and fiber intakes and  
26 553 inflammatory and metabolic indicators in middle-aged subjects from a  
27 554 population-based cohort. *Am J Clin Nutr* 2006;84(5):1062-9.  
28  
29 555 69 Kim DJ, Xun P, Liu K, *et al.* Magnesium intake in relation to systemic  
30 556 inflammation, insulin resistance, and the incidence of diabetes. *Diabetes Care*  
31 557 2010;33(12):2604-10.  
32  
33 558 70 Spector TD, Hart DJ, Nandra D, *et al.* Low-level increases in serum C-reactive  
34 559 protein are present in early osteoarthritis of the knee and predict progressive  
35 560 disease. *Arthritis Rheum* 1997;40(4):723-7.  
36  
37 561 71 Smith JW, Martins TB, Gopez E, *et al.* Significance of C-reactive protein in  
38 562 osteoarthritis and total knee arthroplasty outcomes. *Ther Adv Musculoskelet Dis*  
39 563 2012;4(5):315-25.  
40  
41 564 72 Topf JM, Murray PT. Hypomagnesemia and hypermagnesemia. *Rev Endocr*  
42 565 *Metab Disord* 2003;4(2):195-206.  
43  
44 566 73 Sabatier M, Pont F, Arnaud MJ, *et al.* A compartmental model of magnesium  
45  
46  
47  
48  
49  
50  
51  
52  
53  
54  
55  
56  
57  
58  
59  
60

1  
2  
3  
4  
5  
6  
7  
8  
9  
10  
11  
12  
13  
14  
15  
16  
17  
18  
19  
20  
21  
22  
23  
24  
25  
26  
27  
28  
29  
30  
31  
32  
33  
34  
35  
36  
37  
38  
39  
40  
41  
42  
43  
44  
45  
46  
47  
48  
49  
50  
51  
52  
53  
54  
55  
56  
57  
58  
59  
60

567 metabolism in healthy men based on two stable isotope tracers. *Am J Physiol*  
568 *Regul Integr Comp Physiol* 2003;285(3):R656-63.  
569

For peer review only



570 Table 1 Basic characteristics of included subjects according to quintiles of serum Mg (n=962)

|                                  | Quintiles of serum Mg |              |              |              |              | P     |
|----------------------------------|-----------------------|--------------|--------------|--------------|--------------|-------|
|                                  | Q1 (lowest)           | Q2           | Q3           | Q4           | Q5 (highest) |       |
| Median Mg concentration (mmol/L) | 0.82                  | 0.87         | 0.91         | 0.94         | 0.99         | -     |
| Participants (n)                 | 200                   | 215          | 190          | 168          | 189          | -     |
| Age (years)                      | 53.8 (7.3)            | 54.6 (7.6)   | 55.2 (7.9)   | 55.3 (7.1)   | 56.1 (8.0)   | 0.062 |
| BMI (kg/m <sup>2</sup> )         | 25.2 (3.2)            | 24.9 (3.2)   | 25.0 (3.7)   | 25.2 (3.4)   | 24.6 (3.2)   | 0.464 |
| Female (%)                       | 37.5                  | 42.3         | 36.8         | 42.3         | 37.0         | 0.627 |
| Smoking (%)                      | 27.5                  | 27.4         | 21.6         | 24.4         | 21.7         | 0.457 |
| Alcohol drinking (%)             | 34.5                  | 36.3         | 40.5         | 41.1         | 38.1         | 0.645 |
| High school diploma (%)          | 45.0                  | 47.4         | 45.3         | 56.5         | 48.1         | 0.184 |
| Activity level (h/w)             | 2.0 (3.5)             | 2.0 (3.3)    | 2.3 (3.5)    | 2.1 (3.1)    | 2.4 (3.5)    | 0.457 |
| Fasting glucose (mmol/l)         | 6.6 (3.0)             | 5.7 (1.7)    | 5.7 (1.4)    | 5.5 (0.9)    | 5.5 (1.6)    | 0.009 |
| Systolic pressure (mm Hg)        | 129.2 (16.9)          | 128.3 (17.9) | 130.4 (16.2) | 128.8 (16.3) | 129.6 (17.7) | 0.837 |
| Diastolic pressure (mm Hg)       | 81.2 (11.8)           | 79.8 (12.1)  | 80.7 (11.0)  | 80.7 (10.7)  | 80.3 (10.5)  | 0.654 |
| HDL-cholesterol (mmol/l)         | 1.5 (0.4)             | 1.5 (0.4)    | 1.5 (0.4)    | 1.5 (0.3)    | 1.5 (0.4)    | 0.374 |
| Triglyceride (mmol/l)            | 2.1 (1.9)             | 1.8 (1.5)    | 2.0 (2.1)    | 1.8 (1.0)    | 2.3 (2.9)    | 0.620 |



1  
2  
3  
4  
5  
6  
7  
8  
9  
10  
11  
12  
13  
14  
15  
16  
17  
18  
19  
20  
21  
22  
23  
24  
25  
26  
27  
28  
29  
30  
31  
32  
33  
34  
35  
36  
37  
38  
39  
40  
41  
42  
43  
44  
45  
46  
47

|                                   |               |              |              |              |              |        |
|-----------------------------------|---------------|--------------|--------------|--------------|--------------|--------|
| Uric acid (µmol/l)                | 337.3 (101.7) | 329.0 (80.7) | 321.3 (86.3) | 331.5 (78.0) | 329.4 (81.7) | 0.590  |
| eGFR (ml/min/1.73m <sup>2</sup> ) | 80.2 (14.4)   | 77.7 (10.7)  | 76.0 (10.6)  | 75.8 (10.7)  | 74.3 (12.0)  | <0.001 |
| MetS (%)                          | 26.5          | 17.7         | 25.8         | 19.6         | 17.5         | 0.059  |
| DM (%)                            | 23.5          | 10.7         | 10.0         | 8.3          | 6.3          | <0.001 |
| HP (%)                            | 40.0          | 33.5         | 37.4         | 42.3         | 40.2         | 0.432  |
| HU (%)                            | 25.5          | 19.1         | 13.2         | 18.5         | 14.8         | 0.018  |

571 Data are mean (Standard Deviation), unless otherwise indicated; Mg, magnesium; OA, osteoarthritis; BMI, body mass index; HDL, high density lipoprotein; eGFR,  
572 estimated glomerular filtration rate; MetS, metabolic syndrome; DM, diabetes mellitus; HP, hypertension; HU, hyperuricemia.  
573 # P values are for test of difference across all quintiles of serum Mg.

1  
2  
3  
4  
5  
6  
7 575 Figure 1 The prevalence of MetS (A), DM (B), HP (C) and HU (D) in each quintile of serum Mg in radiographic knee OA patients

8 576 The figures above present the prevalence of MetS (A), DM (B), HP (C) and HU (D) among the 962 OA patients under different quintiles of serum Mg levels. The

9  
10 577 horizontal axis denotes the serum Mg level, and the vertical axis indicates whether a subject is diagnosed with the specific disease: (+) - disease; (-) - no disease.

11  
12 578 The solid gray lines represent the boundaries in between the five quintiles of serum Mg levels. The red and black spots represent the prevalence of diseases and no

13  
14 579 diseases at each serum Mg level, respectively. The darker the color of a spot, the more OA patients there are at the corresponding concentration.

15  
16 580

581 Table 2 Multivariable-adjusted relations of serum Mg and MetS in OA patients (n = 962)

|                                  | Quintiles of serum Mg |                   |                   |                   |                   | <i>P</i> for trend |
|----------------------------------|-----------------------|-------------------|-------------------|-------------------|-------------------|--------------------|
|                                  | Q1 (lowest)           | Q2                | Q3                | Q4                | Q5 (highest)      |                    |
| Median Mg concentration (mmol/L) | 0.82                  | 0.87              | 0.91              | 0.94              | 0.99              | -                  |
| Participants (n)                 | 200                   | 215               | 190               | 168               | 189               | -                  |
| MetS (%)                         | 26.5                  | 17.7              | 25.8              | 19.6              | 17.5              | -                  |
| Model 1*                         | 1.00 (reference)      | 0.61 (0.38, 0.97) | 0.97 (0.61, 1.52) | 0.69 (0.42, 1.14) | 0.59 (0.36, 0.96) | 0.090              |
| <i>P</i> value                   | -                     | 0.038             | 0.881             | 0.150             | 0.035             | -                  |
| Model 2*                         | 1.00 (reference)      | 0.60 (0.37, 0.96) | 1.00 (0.63, 1.57) | 0.70 (0.42, 1.15) | 0.61 (0.37, 0.99) | 0.120              |
| <i>P</i> value                   | -                     | 0.035             | 0.99              | 0.160             | 0.047             | -                  |
| Model 3*                         | 1.00 (reference)      | 0.59 (0.36, 0.94) | 0.95 (0.60, 1.51) | 0.67 (0.40, 1.10) | 0.56 (0.34, 0.93) | 0.067              |
| <i>P</i> value                   | -                     | 0.027             | 0.830             | 0.114             | 0.024             | -                  |

582 Data are adjusted OR (95% CI), unless otherwise indicated; Mg, magnesium; n, number; OA, osteoarthritis; MetS, metabolic syndrome.

583 \*Model 1 was adjusted for age (continuous data) and gender (male, female); Model 2 was adjusted for age (continuous data), gender (male, female), educational  
584 level (high school or above, lower than high school), smoking status (yes, no), activity level (continuous data), alcohol drinking status (yes, no); Model 3 was  
585 adjusted based on model 2, with additional factor of eGFR (continuous data).

586

587 Table 3 Multivariable-adjusted relations of serum Mg and DM in OA patients (n = 962)

|                                  | Quintiles of serum Mg |                   |                   |                   |                   | <i>P</i> for trend |
|----------------------------------|-----------------------|-------------------|-------------------|-------------------|-------------------|--------------------|
|                                  | Q1 (lowest)           | Q2                | Q3                | Q4                | Q5 (highest)      |                    |
| Median Mg concentration (mmol/L) | 0.82                  | 0.87              | 0.91              | 0.94              | 0.99              | -                  |
| Participants (n)                 | 200                   | 215               | 190               | 168               | 189               | -                  |
| DM (%)                           | 23.5                  | 10.7              | 10.0              | 8.3               | 6.3               | -                  |
| Model 1*                         | 1.00 (reference)      | 0.38 (0.22, 0.66) | 0.34 (0.19, 0.61) | 0.29 (0.15, 0.55) | 0.20 (0.10, 0.40) | <0.001             |
| <i>P</i> value                   | -                     | 0.001             | <0.001            | <0.001            | <0.001            | -                  |
| Model 2*                         | 1.00 (reference)      | 0.40 (0.23, 0.70) | 0.32 (0.18, 0.59) | 0.26 (0.13, 0.50) | 0.21 (0.11, 0.42) | <0.001             |
| <i>P</i> value                   | -                     | 0.001             | <0.001            | <0.001            | <0.001            | -                  |
| Model 3*                         | 1.00 (reference)      | 0.40 (0.23, 0.70) | 0.33 (0.18, 0.60) | 0.27 (0.14, 0.52) | 0.22 (0.11, 0.44) | <0.001             |
| <i>P</i> value                   | -                     | 0.001             | <0.001            | <0.001            | <0.001            | -                  |

588 Data are adjusted OR (95% CI), unless otherwise indicated; Mg, magnesium; n, number; OA, osteoarthritis; DM, diabetes mellitus.

589 \*Model 1 was adjusted for age (continuous data) and gender (male, female); Model 2 was adjusted for age (continuous data), BMI (continuous data), gender (male,  
590 female), educational level (high school or above, lower than high school), smoking status (yes, no), activity level (continuous data), alcohol drinking status (yes, no),  
591 hypertension (yes, no), and dyslipidemia (yes, no); Model 3 was adjusted based on model 2, with additional factor of eGFR (continuous data).

592

593 Table 4 Multivariable-adjusted relations of serum Mg and HP in OA patients (n = 962)

|                                  | Quintiles of serum Mg |                   |                   |                   |                   | <i>P</i> for trend |
|----------------------------------|-----------------------|-------------------|-------------------|-------------------|-------------------|--------------------|
|                                  | Q1 (lowest)           | Q2                | Q3                | Q4                | Q5 (highest)      |                    |
| Median Mg concentration (mmol/L) | 0.82                  | 0.87              | 0.91              | 0.94              | 0.99              | -                  |
| Participants (n)                 | 200                   | 215               | 190               | 168               | 189               | -                  |
| HP (%)                           | 40.0                  | 33.5              | 37.4              | 42.3              | 40.2              | -                  |
| Model 1*                         | 1.00 (reference)      | 0.71 (0.47, 1.06) | 0.83 (0.54, 1.25) | 1.00 (0.66, 1.54) | 0.89 (0.59, 1.35) | 0.929              |
| <i>P</i> value                   | -                     | 0.095             | 0.368             | 0.987             | 0.582             | -                  |
| Model 2*                         | 1.00 (reference)      | 0.77 (0.50, 1.19) | 0.89 (0.57, 1.39) | 1.10 (0.70, 1.74) | 1.08 (0.69, 1.68) | 0.377              |
| <i>P</i> value                   | -                     | 0.245             | 0.608             | 0.686             | 0.744             | -                  |
| Model 3*                         | 1.00 (reference)      | 0.77 (0.50, 1.19) | 0.88 (0.56, 1.38) | 1.09 (0.68, 1.72) | 1.05 (0.67, 1.65) | 0.434              |
| <i>P</i> value                   | -                     | 0.235             | 0.574             | 0.727             | 0.818             | -                  |

594 Data are adjusted OR (95% CI), unless otherwise indicated; Mg, magnesium; n, number; OA, osteoarthritis; HP, hypertension.

595 \* Model 1 was adjusted for age (continuous data) and gender (male, female); Model 2 was adjusted for age (continuous data), BMI (continuous data), gender (male,  
596 female), educational level (high school or above, lower than high school), smoking status (yes, no), activity level (continuous data), alcohol drinking status (yes, no),  
597 diabetes (yes, no), and dyslipidemia (yes, no); Model 3 was adjusted based on model 2, with additional factor of eGFR (continuous data).

598

599 Table 5 Multivariable-adjusted relations of serum Mg and HU in OA patients (n = 962)

|                                  | Quintiles of serum Mg |                   |                   |                   |                   | <i>P</i> for trend |
|----------------------------------|-----------------------|-------------------|-------------------|-------------------|-------------------|--------------------|
|                                  | Q1 (lowest)           | Q2                | Q3                | Q4                | Q5 (highest)      |                    |
| Median Mg concentration (mmol/L) | 0.82                  | 0.87              | 0.91              | 0.94              | 0.99              | -                  |
| Participants (n)                 | 200                   | 215               | 190               | 168               | 189               | -                  |
| HU (%)                           | 25.5                  | 19.1              | 13.2              | 18.5              | 14.8              | -                  |
| Model 1*                         | 1.00 (reference)      | 0.71 (0.44, 1.14) | 0.44 (0.26, 0.75) | 0.68 (0.41, 1.14) | 0.51 (0.30, 0.85) | 0.008              |
| <i>P</i> value                   | -                     | 0.157             | 0.002             | 0.144             | 0.010             | -                  |
| Model 2*                         | 1.00 (reference)      | 0.73 (0.45, 1.20) | 0.38 (0.22, 0.67) | 0.59 (0.35, 1.02) | 0.50 (0.29, 0.87) | 0.006              |
| <i>P</i> value                   | -                     | 0.210             | 0.001             | 0.058             | 0.013             | -                  |
| Model 3*                         | 1.00 (reference)      | 0.68 (0.41, 1.14) | 0.33 (0.19, 0.59) | 0.52 (0.30, 0.91) | 0.39 (0.22, 0.70) | <0.001             |
| <i>P</i> value                   | -                     | 0.142             | <0.001            | 0.022             | 0.001             | -                  |

600 Data are adjusted OR (95% CI), unless otherwise indicated; Mg, magnesium; n, number; OA, osteoarthritis; HU, hyperuricemia.

601 \* Model 1 was adjusted for age (continuous data) and gender (male, female); Model 2 was adjusted for age (continuous data), BMI (continuous data), gender (male,  
 602 female), educational level (high school or above, lower than high school), smoking status (yes, no), activity level (continuous data), alcohol drinking status (yes, no),  
 603 hypertension (yes, no), diabetes (yes, no), and dyslipidemia (yes, no); Model 3 was adjusted based on model 2, with additional factor of eGFR (continuous data)

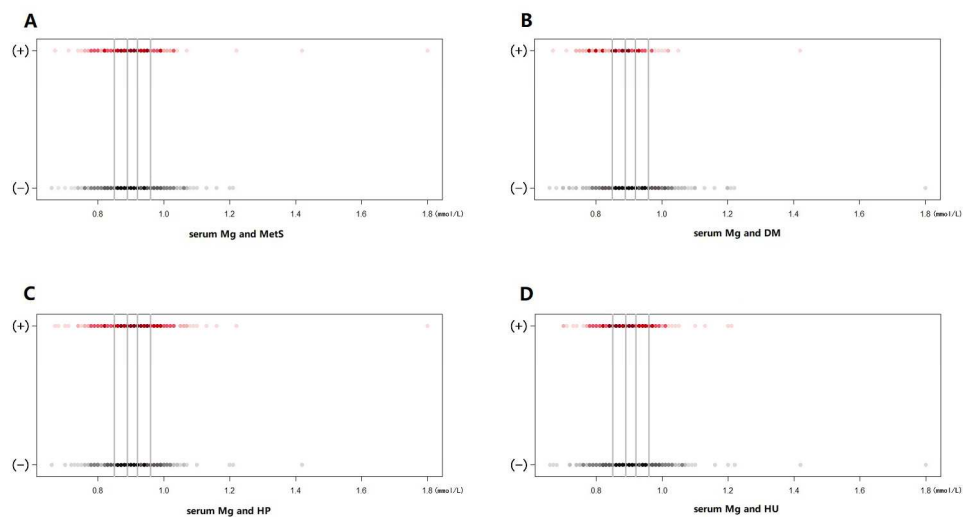

Figure 1 The prevalence of MetS (A), DM (B), HP (C) and HU (D) in each quintile of serum Mg in radiographic knee OA patients

The figures above present the prevalence of MetS (A), DM (B), HP (C) and HU (D) among the 962 OA patients under different quintiles of serum Mg levels. The horizontal axis denotes the serum Mg level, and the vertical axis indicates whether a subject is diagnosed with the specific disease: (+) - disease; (-) - no disease. The solid gray lines represent the boundaries in between the five quintiles of serum Mg levels. The red and black spots represent the prevalence of diseases and no diseases at each serum Mg level, respectively. The darker the color of a spot, the more OA patients there are at the corresponding concentration.

549x304mm (300 x 300 DPI)

## STROBE Statement—checklist of items that should be included in reports of observational studies

|                           | Item No | Recommendation                                                                                                                                                                             | Reported on Page No |
|---------------------------|---------|--------------------------------------------------------------------------------------------------------------------------------------------------------------------------------------------|---------------------|
| <b>Title and abstract</b> | 1       | (a) Indicate the study's design with a commonly used term in the title or the abstract                                                                                                     | 2                   |
|                           |         | (b) Provide in the abstract an informative and balanced summary of what was done and what was found                                                                                        | 2                   |
| <b>Introduction</b>       |         |                                                                                                                                                                                            |                     |
| Background/rationale      | 2       | Explain the scientific background and rationale for the investigation being reported                                                                                                       | 4                   |
| Objectives                | 3       | State specific objectives, including any prespecified hypotheses                                                                                                                           | 4                   |
| <b>Methods</b>            |         |                                                                                                                                                                                            |                     |
| Study design              | 4       | Present key elements of study design early in the paper                                                                                                                                    | 4-5                 |
| Setting                   | 5       | Describe the setting, locations, and relevant dates, including periods of recruitment, exposure, follow-up, and data collection                                                            | 4-5                 |
| Participants              | 6       | (a) <i>Cohort study</i> —Give the eligibility criteria, and the sources and methods of selection of participants. Describe methods of follow-up                                            | 4-5                 |
|                           |         | <i>Case-control study</i> —Give the eligibility criteria, and the sources and methods of case ascertainment and control selection. Give the rationale for the choice of cases and controls |                     |
|                           |         | <i>Cross-sectional study</i> —Give the eligibility criteria, and the sources and methods of selection of participants                                                                      |                     |
|                           |         | (b) <i>Cohort study</i> —For matched studies, give matching criteria and number of exposed and unexposed                                                                                   | -                   |
|                           |         | <i>Case-control study</i> —For matched studies, give matching criteria and the number of controls per case                                                                                 |                     |
| Variables                 | 7       | Clearly define all outcomes, exposures, predictors, potential confounders, and effect modifiers. Give diagnostic criteria, if applicable                                                   | 4-6                 |
| Data sources/measurement  | 8*      | For each variable of interest, give sources of data and details of methods of assessment (measurement). Describe comparability of assessment methods if there is more than one group       | 5-6                 |
| Bias                      | 9       | Describe any efforts to address potential sources of bias                                                                                                                                  | 6-7                 |
| Study size                | 10      | Explain how the study size was arrived at                                                                                                                                                  | 4-5                 |
| Quantitative variables    | 11      | Explain how quantitative variables were handled in the analyses. If applicable, describe which groupings were chosen and why                                                               | 6-7                 |
| Statistical methods       | 12      | (a) Describe all statistical methods, including those used to control for confounding                                                                                                      | 6-7                 |
|                           |         | (b) Describe any methods used to examine subgroups and interactions                                                                                                                        | -                   |
|                           |         | (c) Explain how missing data were addressed                                                                                                                                                | -                   |
|                           |         | (d) <i>Cohort study</i> —If applicable, explain how loss to follow-up was addressed                                                                                                        | 4-5                 |
|                           |         | <i>Case-control study</i> —If applicable, explain how matching of cases and controls was addressed                                                                                         |                     |
|                           |         | <i>Cross-sectional study</i> —If applicable, describe analytical methods taking account of sampling strategy                                                                               |                     |
|                           |         | (e) Describe any sensitivity analyses                                                                                                                                                      | 6-7                 |

Continued on next page



**Results**

|                          |     |                                                                                                                                                                                                              |       |
|--------------------------|-----|--------------------------------------------------------------------------------------------------------------------------------------------------------------------------------------------------------------|-------|
| Participants             | 13* | (a) Report numbers of individuals at each stage of study—eg numbers potentially eligible, examined for eligibility, confirmed eligible, included in the study, completing follow-up, and analysed            | 4-5   |
|                          |     | (b) Give reasons for non-participation at each stage                                                                                                                                                         | 4-5   |
|                          |     | (c) Consider use of a flow diagram                                                                                                                                                                           | -     |
| Descriptive data         | 14* | (a) Give characteristics of study participants (eg demographic, clinical, social) and information on exposures and potential confounders                                                                     | 8     |
|                          |     | (b) Indicate number of participants with missing data for each variable of interest                                                                                                                          | -     |
|                          |     | (c) <i>Cohort study</i> —Summarise follow-up time (eg, average and total amount)                                                                                                                             | -     |
| Outcome data             | 15* | <i>Cohort study</i> —Report numbers of outcome events or summary measures over time                                                                                                                          | -     |
|                          |     | <i>Case-control study</i> —Report numbers in each exposure category, or summary measures of exposure                                                                                                         | -     |
|                          |     | <i>Cross-sectional study</i> —Report numbers of outcome events or summary measures                                                                                                                           | 8-10  |
| Main results             | 16  | (a) Give unadjusted estimates and, if applicable, confounder-adjusted estimates and their precision (eg, 95% confidence interval). Make clear which confounders were adjusted for and why they were included | 8-10  |
|                          |     | (b) Report category boundaries when continuous variables were categorized                                                                                                                                    | 8-10  |
|                          |     | (c) If relevant, consider translating estimates of relative risk into absolute risk for a meaningful time period                                                                                             | -     |
| Other analyses           | 17  | Report other analyses done—eg analyses of subgroups and interactions, and sensitivity analyses                                                                                                               | 8-10  |
| <b>Discussion</b>        |     |                                                                                                                                                                                                              |       |
| Key results              | 18  | Summarise key results with reference to study objectives                                                                                                                                                     | 10    |
| Limitations              | 19  | Discuss limitations of the study, taking into account sources of potential bias or imprecision. Discuss both direction and magnitude of any potential bias                                                   | 11-12 |
| Interpretation           | 20  | Give a cautious overall interpretation of results considering objectives, limitations, multiplicity of analyses, results from similar studies, and other relevant evidence                                   | 10-11 |
| Generalisability         | 21  | Discuss the generalisability (external validity) of the study results                                                                                                                                        | 11-12 |
| <b>Other information</b> |     |                                                                                                                                                                                                              |       |
| Funding                  | 22  | Give the source of funding and the role of the funders for the present study and, if applicable, for the original study on which the present article is based                                                | 13    |

\*Give information separately for cases and controls in case-control studies and, if applicable, for exposed and unexposed groups in cohort and cross-sectional studies.

**Note:** An Explanation and Elaboration article discusses each checklist item and gives methodological background and published examples of transparent reporting. The STROBE checklist is best used in conjunction with this article (freely available on the Web sites of PLoS Medicine at <http://www.plosmedicine.org/>, Annals of Internal Medicine at <http://www.annals.org/>, and Epidemiology at <http://www.epidem.com/>). Information on the STROBE Initiative is available at [www.strobe-statement.org](http://www.strobe-statement.org).

# BMJ Open

## Association between serum magnesium concentration and metabolic syndrome, diabetes, hypertension and hyperuricemia in knee osteoarthritis: a cross-sectional study in Hunan Province, China

|                                 |                                                                                                                                                                                                                                                                                                                                                                                                                                                                                                                                                                                                                                                                                                                                                                                                                                                                               |
|---------------------------------|-------------------------------------------------------------------------------------------------------------------------------------------------------------------------------------------------------------------------------------------------------------------------------------------------------------------------------------------------------------------------------------------------------------------------------------------------------------------------------------------------------------------------------------------------------------------------------------------------------------------------------------------------------------------------------------------------------------------------------------------------------------------------------------------------------------------------------------------------------------------------------|
| Journal:                        | <i>BMJ Open</i>                                                                                                                                                                                                                                                                                                                                                                                                                                                                                                                                                                                                                                                                                                                                                                                                                                                               |
| Manuscript ID                   | bmjopen-2017-019159.R4                                                                                                                                                                                                                                                                                                                                                                                                                                                                                                                                                                                                                                                                                                                                                                                                                                                        |
| Article Type:                   | Research                                                                                                                                                                                                                                                                                                                                                                                                                                                                                                                                                                                                                                                                                                                                                                                                                                                                      |
| Date Submitted by the Author:   | 31-Jul-2018                                                                                                                                                                                                                                                                                                                                                                                                                                                                                                                                                                                                                                                                                                                                                                                                                                                                   |
| Complete List of Authors:       | Wang, Yi-lun; Xiangya Hospital Central South University, Orthopaedics<br>Wei, Jie; Xiangya Hospital Central South University, Health Management Center<br>Zeng, Chao; Xiangya Hospital Central South University, Orthopaedics<br>Yang, Tuo; Xiangya Hospital Central South University, Orthopaedics<br>Li, Hui; Xiangya Hospital Central South University, Orthopaedics<br>Cui, Yang; Xiangya Hospital Central South University, International Medical Center<br>Xie, Dong-xing; Xiangya Hospital, Central South University, Orthopaedics<br>Xu, Bei; Xiangya Hospital Central South University, Orthopaedics<br>Liu, Zhi-chen; Xiangya Hospital Central South University, Orthopaedics<br>Li, Jia-tian; Xiangya Hospital Central South University, Orthopaedics<br>Jiang, Shi-de; Xiangya Hospital Central South University<br>Lei, Guanghua; Xiangya Hospital, Orthopaedics |
| <b>Primary Subject Heading</b>: | Rheumatology                                                                                                                                                                                                                                                                                                                                                                                                                                                                                                                                                                                                                                                                                                                                                                                                                                                                  |
| Secondary Subject Heading:      | Rheumatology, Public health, Epidemiology                                                                                                                                                                                                                                                                                                                                                                                                                                                                                                                                                                                                                                                                                                                                                                                                                                     |
| Keywords:                       | osteoarthritis, magnesium, metabolic syndrome, diabetes, Hypertension < CARDIOLOGY, hyperuricemia                                                                                                                                                                                                                                                                                                                                                                                                                                                                                                                                                                                                                                                                                                                                                                             |
|                                 |                                                                                                                                                                                                                                                                                                                                                                                                                                                                                                                                                                                                                                                                                                                                                                                                                                                                               |

SCHOLARONE™  
Manuscripts

1  
2  
3 **1 Association between serum magnesium concentration and metabolic syndrome,**  
4 **2 diabetes, hypertension and hyperuricemia in knee osteoarthritis: a**  
5 **3 cross-sectional study in Hunan Province, China**  
6  
7  
8  
9

10 Yilun Wang<sup>1</sup>, Jie Wei<sup>2</sup>, Chao Zeng<sup>1</sup>, Tuo Yang<sup>1</sup>, Hui Li<sup>1</sup>, Yang Cui<sup>3</sup>, Dongxing Xie<sup>1</sup>,  
11 Bei Xu<sup>1</sup>, Zhichen Liu<sup>1</sup>, Jiatian Li<sup>1</sup>, Shide Jiang<sup>1</sup>, Guanghua Lei<sup>1\*</sup>  
12  
13  
14

15  
16 <sup>1</sup>Department of Orthopaedics, Xiangya Hospital, Central South University, Changsha,  
17 Hunan Province, China, 410008;  
18

19  
20 <sup>2</sup>Health Management Center, Xiangya Hospital, Central South University, Changsha,  
21 Hunan Province, China. 410008;  
22

23  
24 <sup>3</sup>International Medical Center, Xiangya Hospital, Central South University, Changsha,  
25 Hunan Province, China. 410008;  
26

27  
28  
29 \*Correspondence to: Guanghua Lei, MD, PhD, Department of Orthopaedics, Xiangya  
30 Hospital, Central South University, #87 Xiangya Road, Changsha, Hunan, China,  
31 410008. E-mail: lei\_guanghua@csu.edu.cn. Tel. 0731-84327326  
32  
33  
34  
35  
36  
37  
38  
39  
40  
41  
42  
43  
44  
45  
46  
47  
48  
49  
50  
51  
52  
53  
54  
55  
56  
57  
58  
59  
60

1  
2  
3 **Abstract**

4  
5 **Objectives:** To examine the associations between serum magnesium (Mg)  
6  
7 concentration with the prevalence of metabolic syndrome (MetS), diabetes mellitus  
8  
9 (DM), hypertension (HP) and hyperuricemia (HU) in radiographic knee osteoarthritis  
10  
11 (OA) patients.

12 **Methods:** The present study was conducted at the Health Management Center of  
13  
14 Xiangya Hospital. Radiographic OA was evaluated for patients aged over 40 years  
15  
16 with basic characteristics and blood biochemical assessment. Serum Mg concentration  
17  
18 was measured using the chemiluminescence method. MetS, DM, HP and HU were  
19  
20 diagnosed based on standard protocols. The associations between serum Mg  
21  
22 concentration with MetS, DM, HP and HU were evaluated by conducting  
23  
24 multivariable adjusted logistic regression.

25 **Results:** A total of 962 radiographic knee OA patients were included. Compared with  
26  
27 the lowest quintile, the multivariable-adjusted odds ratios (ORs) and related 95%  
28  
29 confidence intervals (95%CI) of DM were 0.40 (95%CI 0.23-0.70, P=0.001), 0.33  
30  
31 (95%CI 0.18-0.60, P<0.001), 0.27 (95%CI 0.14-0.52, P<0.001) and 0.22 (95%CI  
32  
33 0.11-0.44, P<0.001) in the second, third, fourth and highest quintiles of serum Mg,  
34  
35 respectively (P for trend <0.001); the multivariable-adjusted ORs of HU were 0.33  
36  
37 (95%CI 0.19-0.59, P<0.001), 0.52 (95%CI 0.30-0.91, P=0.022) and 0.39 (95%CI  
38  
39 0.22-0.70, P=0.001) in the third, fourth and highest quintiles of serum Mg  
40  
41 respectively (P for trend <0.001); and the multivariable-adjusted ORs of MetS were  
42  
43 0.59 (95%CI 0.36-0.94, P=0.027) in the second and 0.56 (95%CI 0.34-0.93, P=0.024)  
44  
45 in the highest quintiles of serum Mg. However, the inverse association between serum  
46  
47 Mg and the prevalence of MetS was nonlinear (P for trend =0.067). There was no  
48  
49 significant association between serum Mg and HP in OA patients.

50 **Conclusions:** The serum Mg concentration was inversely associated with the  
51  
52 prevalence of MetS, DM and HU in radiographic knee OA patients.

53 **Level of Evidence:** Level III, cross-sectional study.

54 **Key words:** osteoarthritis, magnesium, metabolic syndrome, diabetes, hypertension,  
55  
56 hyperuricemia  
57

1  
2  
3 49 **Strengths and limitations of this study**  
4

- 5 50 1. This is the first study examining the associations between serum magnesium (Mg)  
6  
7 51 and the prevalence of metabolic syndrome, diabetes mellitus, hypertension and  
8  
9 52 hyperuricemia in radiographic knee osteoarthritis patients.  
10  
11 53 2. The multivariable logistical regression models in this study were adjusted for a  
12  
13 54 considerable number of potential confounding factors, which greatly improved the  
14  
15 55 reliability of the results.  
16  
17 56 3. The kidney is the key organ in maintaining Mg homeostasis. This study conducted  
18  
19 57 a sensitivity analysis by adding estimated glomerular filtration rate into the  
20  
21 58 multivariable logistic regression models, and the reverse associations remained  
22  
23 59 significant.  
24  
25 60 4. This study adopted cross-sectional design which precluded causal correlations.  
26  
27 61 5. Serum Mg concentration was adopted as the indicator of body Mg content in this  
28  
29 62 study which may not be the best indicator of body status.  
30  
31  
32  
33  
34  
35  
36  
37  
38  
39  
40  
41  
42  
43  
44  
45  
46  
47  
48  
49  
50  
51  
52  
53  
54  
55  
56  
57  
58  
59  
60  
63

## 64 **Introduction**

65 The association between osteoarthritis (OA) and metabolic diseases, especially  
66 metabolic syndrome (MetS)<sup>1 2</sup> and diabetes mellitus (DM),<sup>3-5</sup> has drawn increasing  
67 attention in the past few years. OA includes three specific phenotypes: metabolic OA,  
68 age-related OA and injury-related OA.<sup>6</sup> A large number of studies have indicated that  
69 the prevalence of MetS,<sup>7-9</sup> DM<sup>10-18</sup> and hypertension (HP)<sup>7 9-13 19 20</sup> is either higher in  
70 OA patients or associated with OA. In addition, some other studies reported that  
71 MetS,<sup>21 22</sup> DM<sup>23 24</sup> and HP<sup>21 22</sup> are risk factors of OA progression. Thus, it appears  
72 necessary to pay more attention and adopt appropriate measures to reduce the high  
73 prevalence of metabolic diseases in OA patients, which also seems to be beneficial in  
74 delaying OA progression.

75 Serum magnesium (Mg), one of the most important micronutrients for human  
76 health, has been reported to be negatively associated with MetS,<sup>25-29</sup> DM<sup>30-38</sup> and HP<sup>30</sup>  
77 <sup>39-41</sup> by lots of studies. Meanwhile, our previous study showed an inverse association  
78 between serum Mg and hyperuricemia (HU).<sup>42</sup> However, to the best knowledge of the  
79 authors, there is not yet a study examining the association between the serum Mg  
80 concentration and the aforementioned metabolic diseases (MetS, DM, HP and HU) in  
81 OA patients. On the other hand, we have previously shown that the serum Mg  
82 concentration may be inversely associated with radiographic knee OA.<sup>43</sup> Therefore,  
83 we speculate that the prevalence of MetS, DM, HP and HU in OA patients may be  
84 reduced by elevating the level of serum Mg, which can in turn delay OA progression.  
85 Thus, the objective of the present study was to examine the associations between the  
86 serum Mg concentration with the prevalence of MetS, DM, HP and HU in  
87 radiographic knee OA patients. It was hypothesized that serum Mg concentration was  
88 inversely associated with these diseases.

## 90 **Methods**

### 91 **Study population**

92 The present study was conducted at the Health Management Center of Xiangya  
93 Hospital between October 2013 and November 2014. The study design has been

1  
2  
3 94 published previously.<sup>42-46</sup> The protocol has been reviewed and approved by the Ethics  
4  
5 95 Committee of Xiangya Hospital, Central South University (reference numbers:  
6  
7 96 201312459), and the methods were developed in “accordance” with the approved  
8  
9 97 guidelines. Informed consent has been obtained from all participants. Registered  
10  
11 98 nurses were engaged to interview all participants during the examination using a  
12  
13 99 standard questionnaire, with the purpose to collect information on demographic  
14  
15 100 characteristics and health-related habits. Participants were selected based on the  
16  
17 101 following inclusion criteria: 1) 40 years old or above; 2) undergoing weight-bearing  
18  
19 102 bilateral anteroposterior radiography of the knee, and diagnosed with knee OA  
20  
21 103 according to the Kellgren-Lawrence (K-L) radiographic atlas (knee joint was graded  
22  
23 104 K-L 2 or above); 3) availability of all basic characteristics, including age, gender,  
24  
25 105 body mass index (BMI) and blood pressure; 4) availability of biochemical test results,  
26  
27 106 including serum Mg concentration; 5) availability of information related to the living  
28  
29 107 habits, including education background, activity level, smoking, drinking and  
30  
31 108 medication status. Initially, the present cross-sectional study retrieved 1820  
32  
33 109 radiographic knee OA patients aged over 40 years who exhibited sound basic  
34  
35 110 characteristics and required blood biochemical assessment (including serum Mg  
36  
37 111 concentration). Among them, 962 patients offered demographic characteristics and  
38  
39 112 health-related habits and were finally included in this study.

113

#### 114 **Blood biochemistry**

115 All blood samples were drawn after a 12-hour overnight fast and were kept at 4°C  
116 until analysis. Blood tests were undertaken using the Beckman Coulter AU 5800  
117 (Beckman Coulter Inc., Brea, CA, USA). The inter- and intra-assay coefficients of  
118 variation were tested at both low concentrations (2.5 mmol/L for glucose, 118 µmol/L  
119 for uric acid and 0.60 mmol/L for serum Mg) and high concentrations (6.7 mmol/L for  
120 glucose, 472 µmol/L for uric acid and 1.00 mmol/L for serum Mg) of standard human  
121 samples. The intra-assay coefficients of variation were 0.98% (2.5 mmol/L) and 1.72%  
122 (6.7 mmol/L) for glucose, 1.39% (118 µmol/L) and 0.41% (472 µmol/L) for uric acid,  
123 and 1.86% (0.60 mmol/L) and 1.65% (1.00 mmol/L) for serum Mg respectively. The

1  
2  
3 124 inter-assay coefficients of variation were 2.45% (2.5 mmol/L) and 1.46% (6.7 mmol/L)  
4  
5 125 for glucose, 1.40% (118  $\mu\text{mol/L}$ ) and 1.23% (472  $\mu\text{mol/L}$ ) for uric acid, and 1.87%  
6  
7 126 (0.60 mmol/L) and 1.70% (1.00 mmol/L) for serum Mg respectively.  
8  
9

127

### 128 **Assessment of other exposures**

129 Blood pressure was measured by an electronic sphygmomanometer. The weight and  
130 height of each subject were measured respectively to calculate the BMI. Information  
131 on the average frequency of physical activity (never, one to two times per week, three  
132 to four times per week, five times and above per week) and average duration of  
133 physical activity (less than half an hour, half an hour to one hour, one to two hours,  
134 more than two hours) were collected through survey questionnaire. The smoking,  
135 alcohol drinking and medication status were collected during the face-to-face  
136 interview.  
137

### 138 **Assessment of MetS, DM, HP and HU**

139 MetS was diagnosed based on the Chinese Diabetes Society (CDS) criteria,<sup>47-49</sup> which  
140 requires meeting at least 3 of the following 4 items: (1) BMI  $\geq 25$  kg/m<sup>2</sup>; (2) Fasting  
141 plasma glucose (FPG)  $\geq 6.1$  mmol/L, or diagnosed DM; (3) Systolic blood pressure  
142 (BP)  $\geq 140$  mmHg or diastolic BP  $\geq 90$  mmHg, or treatment of previously diagnosed  
143 HP; (4) Triglycerides  $\geq 1.7$  mmol/L and/or HDL-cholesterol  $< 0.9$  mmol/L in male or  
144  $< 1.0$  mmol/L in female, or treatment for this lipid abnormality. Subjects with the  
145 fasting glucose  $\geq 7.0$  mmol/L or currently undergoing drug treatment for blood glucose  
146 control were regarded as DM patients, and subjects with the systolic blood pressure  
147  $\geq 140$  mm Hg or diastolic blood pressure  $\geq 90$  mm Hg or currently undertaking  
148 antihypertensive medication were regarded as HP patients. HU was defined as uric  
149 acid  $\geq 416$   $\mu\text{mol/L}$  for male and  $\geq 360$   $\mu\text{mol/L}$  for female or currently undergoing drug  
150 treatment for uric acid control.  
151

### 152 **Statistical analysis**

153 The continuous data were expressed as mean with standard deviation, and the



1  
2  
3 154 category data were expressed in percentage. Differences in continuous data were  
4  
5 155 evaluated by one-way classification ANOVA (normally distributed data) or  
6  
7 156 Kruskal-Wallis H test (non-normally distributed data), while differences in category  
8  
9 157 data were assessed by the  $\chi^2$  test. The serum Mg was classified into five categories  
10  
11 158 based on the quintile distribution:  $\leq 0.85$ , 0.86-0.89, 0.90-0.92, 0.93-0.96 and  $\geq 0.97$   
12  
13 159 mmol/L. The prevalence of MetS, DM, HP and HU in each quintile of serum Mg in  
14  
15 160 OA patients were assessed by scatter plots.

16  
17 161 Logistic regression was conducted to calculate the odds ratios (ORs) with 95%  
18  
19 162 confidence intervals (95%CI) for the associations between serum Mg and MetS, DM,  
20  
21 163 HP and HU. Specifically, model 1 was adjusted by covariates of age (continuous data)  
22  
23 164 and gender (male, female). Then, model 2 was adjusted by additional covariates of  
24  
25 165 BMI (continuous data), educational level (high school or above, lower than high  
26  
27 166 school), smoking status (yes, no), activity level (continuous data), alcohol drinking  
28  
29 167 status (yes, no), HP (yes, no), DM (yes, no), and dyslipidemia (yes, no) on the basis of  
30  
31 168 model 1. Dyslipidemia was defined as triglycerides  $\geq 1.7$  mmol/L and/or  
32  
33 169 HDL-cholesterol  $< 0.9$  mmol/L in male or  $< 1.0$  mmol/L in female, or treatment for this  
34  
35 170 lipid abnormality. Notably, the selection of covariates in model 2 varied slightly for  
36  
37 171 examining different associations (between serum Mg and MetS, DM, HP or HU). For  
38  
39 172 example, BMI, HP and dyslipidemia were adjusted for the association between serum  
40  
41 173 Mg and DM, but not for the association between serum Mg and MetS, simply because  
42  
43 174 MetS was diagnosed based on BMI, HP and dyslipidemia status. Model 3 was  
44  
45 175 established based on model 2, with adjustment of an additional covariate, estimated  
46  
47 176 glomerular filtration rate (eGFR). eGFR (continuous data) was calculated from the  
48  
49 177 Chronic Kidney Disease Epidemiology Collaboration equation.<sup>50</sup> All covariates in the  
50  
51 178 present study were chosen referring to some of the previous similar studies.<sup>27 33 51 52</sup>  
52  
53 179 Tests for linear trends were conducted based on logistic regression using a median  
54  
55 180 variable of Mg concentration in each category.

56  
57 181 Scatter plots were plotted using R 3.4.4.<sup>53</sup> Other data analyses were performed  
58  
59 182 using SPSS 17.0;  $P \leq 0.05$  was considered to be statistically significant. All tests were  
60  
183 two tailed.

184

**185 Patient and public involvement**

186 No patients were involved in setting the research question or the outcome measures,  
187 nor were they involved in the design or implementation of the study. There were no  
188 plans to disseminate the results of the research to study participants.

189

**190 Results**

191 A total of 962 subjects (377 females, accounting for 39.2%) were included in the  
192 present cross-sectional study. The characteristics of the study population according to  
193 quintiles of serum Mg were presented in Table 1. The mean age of the subjects was  
194  $54.9 \pm 7.6$  years old. The overall prevalence of MetS, DM, HP and HU in OA patients  
195 were 21.4%, 12.0%, 38.5% and 18.3% respectively. Significant differences were  
196 observed across the quintiles of serum Mg for fasting glucose, as well as the  
197 prevalence of DM and HU.

198 The prevalence of MetS in each quintile of serum Mg in OA patients was shown  
199 in Figure 1 (A). The outcomes of multivariable adjusted associations between MetS  
200 and serum Mg concentration were shown in Table 2. Compared with the lowest  
201 quintile, the age-gender adjusted ORs (Model 1) suggested significant decreased  
202 prevalence of MetS in the second (OR=0.61, 95%CI 0.38-0.97, P=0.038) and the  
203 highest (OR=0.59, 95%CI 0.36-0.96, P=0.035) quintiles of serum Mg; the  
204 multivariable adjusted ORs (Model 2) also suggested significant decreased prevalence  
205 of MetS in the second (OR=0.60, 95%CI 0.37-0.96, P=0.035) and the highest  
206 (OR=0.61, 95%CI 0.37-0.99, P=0.047) quintiles. The sensitivity analysis, by adding  
207 eGFR into model 2, also reached similar results - significant lower prevalence of  
208 MetS in the second (OR=0.59, 95%CI 0.36-0.94, P=0.027) and the highest quintiles  
209 (OR=0.56, 95%CI 0.34-0.93, P=0.024) compared with the reference quintile of serum  
210 Mg. No clear trend was evident in the third and fourth quintiles of serum Mg. The P  
211 for trend were 0.090 (Model 1), 0.120 (Model 2), 0.067 (Model 3), respectively.

212 Figure 1 (B) showed the prevalence of DM in each category of serum Mg in OA  
213 patients. Table 3 illustrated the multivariable adjusted relations between serum Mg

1  
2  
3 214 and DM in OA patients. Both the age-gender adjusted OR values (Model 1) and the  
4  
5 215 multivariable adjusted OR values (Model 2) suggested a strong inverse association  
6  
7 216 between serum Mg and DM. The age-gender adjusted ORs for the prevalence of DM  
8  
9 217 were 0.38 (95%CI 0.22-0.66, P=0.001), 0.34 (95%CI 0.19-0.61, P<0.001), 0.29  
10  
11 218 (95%CI 0.15-0.55, P<0.001), and 0.20 (95%CI 0.10-0.40, P<0.001) in the second,  
12  
13 219 third, fourth and fifth quintiles of serum Mg respectively, and the P for trend was  
14  
15 220 <0.001. The multivariable adjusted ORs for the prevalence of DM were 0.40 (95%CI  
16  
17 221 0.23-0.70, P=0.001), 0.32 (95%CI 0.18-0.59, P<0.001), 0.26 (95%CI 0.13-0.50,  
18  
19 222 P<0.001), and 0.21 (95%CI 0.11-0.42, P<0.001) in the second, third, fourth and fifth  
20  
21 223 quintiles of serum Mg respectively, and the P for trend was <0.001. The sensitivity  
22  
23 224 analysis, by adding eGFR into model 2, showed similar results - significant lower  
24  
25 225 prevalence of DM in the second (OR=0.40, 95%CI 0.23-0.70, P=0.001), third  
26  
27 226 (OR=0.33, 95%CI 0.18-0.60, P<0.001), fourth (OR=0.27, 95%CI 0.14-0.52, P<0.001),  
28  
29 227 and highest quintiles (OR=0.22, 95%CI 0.11-0.44, P<0.001) compared with the  
30  
31 228 reference quintile of serum Mg, and the P for trend was <0.001.

32  
33 229 The prevalence of HP in each quintile of serum Mg in OA patients was depicted  
34  
35 230 in Figure 1 (C). The multivariable-adjusted relations between serum Mg and HP in  
36  
37 231 OA patients were illustrated in Table 4. According to both the age-gender adjusted  
38  
39 232 ORs (Model 1) and the multivariable adjusted ORs (Model 2), there was no  
40  
41 233 significant association between serum Mg and HP, and the P for trend were 0.929 and  
42  
43 234 0.377, respectively. The sensitivity analysis, by adding eGFR into model 2, reached  
44  
45 235 the same results.

46  
47 236 The prevalence of HU in each category of serum Mg in OA patients was shown  
48  
49 237 in Figure 1 (D). The multivariable-adjusted relations between serum Mg and HU in  
50  
51 238 OA patients were illustrated in Table 5. Both the age-gender adjusted OR values  
52  
53 239 (Model 1) and the multivariable adjusted OR values (Model 2) suggested significant  
54  
55 240 decreased prevalence of HU in the third quintile (age-gender adjusted OR=0.44,  
56  
57 241 95%CI 0.26-0.75, P=0.002; multivariable adjusted OR=0.38, 95%CI 0.22-0.67,  
58  
59 242 P=0.001) and fifth quintile (age-gender adjusted OR=0.51, 95%CI 0.30-0.85, P=0.010;  
60  
243 multivariable adjusted OR=0.50, 95%CI 0.29-0.87, P=0.013) compared with the

1  
2  
3 244 lowest quintile of serum Mg, and the P for trend were 0.008 and 0.006, respectively.  
4  
5 245 The sensitivity analysis, by adding eGFR into model 2, showed similar outcomes -  
6  
7 246 significant lower prevalence of HU in the third (OR=0.33, 0.19-0.59, P<0.001), fourth  
8  
9 247 (OR=0.52, 95%CI 0.30-0.91, P=0.022), and highest quintiles (OR=0.39, 95%CI  
10  
11 248 0.22-0.70, P=0.001) compared with the reference quintile of serum Mg, and the P for  
12  
13 249 trend was <0.001.

14  
15 250

## 16 251 **Discussion**

17  
18 252 The results of this study suggested that the serum Mg concentration was negatively  
19  
20 253 associated with the prevalence of MetS, DM and HU in subjects with radiographic  
21  
22 254 knee OA. To control potential confounders, several covariates including  
23  
24 255 characteristics, living habits and underlying diseases were selected, and even the  
25  
26 256 eGFR was added into the multivariable logistic regression models to eliminate the  
27  
28 257 influence of renal function on Mg excretion. The reverse associations mentioned  
29  
30 258 above remained significant after adjustments of these confounders. However, the  
31  
32 259 association between serum Mg and the prevalence of MetS was nonlinear, with no  
33  
34 260 clear trend in the third and fourth quintiles of serum Mg. Moreover, the negative  
35  
36 261 association between serum Mg and the prevalence of HP was not observed in  
37  
38 262 radiographic knee OA patients.

39  
40 263 Mg, the fourth most abundant cation in human body and the second most profuse  
41  
42 264 intracellular cation, is a metallic cofactor for over 300 enzymatic reactions. It appears  
43  
44 265 to play an important role in glucose metabolism and insulin homeostasis, which are  
45  
46 266 both highly correlated with metabolic diseases, especially MetS and DM. The  
47  
48 267 mechanisms involved in Mg deficiency in patients with MetS, DM and HU are  
49  
50 268 probably multifactorial. The most important factor may be insulin resistance, as Mg is  
51  
52 269 essential for insulin action and is a critical cofactor for several enzymes in  
53  
54 270 carbohydrate metabolism, which is important for the phosphorylation reactions of  
55  
56 271 tyrosine-kinase in the insulin receptor.<sup>31 54-58</sup> Of course, it is necessary to highlight the  
57  
58 272 fact that insulin can also induce Mg excretion<sup>59</sup> and produce a significant decline of  
59  
60 273 plasma Mg through ion exchange.<sup>60</sup> Thus, there seems to be a vicious circle between

1  
2  
3 274 Mg deficiency and insulin resistance.  
4

5 275 Other potential mechanisms include glucose transportation,<sup>57</sup> oxidative stress<sup>57</sup>  
6  
7 276 and inflammatory cytokines,<sup>61-63</sup> and cellular calcium homeostasis.<sup>55</sup> Mg is an  
8  
9 277 essential cofactor of the high-energy phosphate-bound enzymatic pathways involved  
10  
11 278 in the modulation of glucose transport across cell membranes.<sup>57</sup> It also plays a role in  
12  
13 279 the mechanisms of cellular antioxidant defense.<sup>64</sup> The oxidative stress, defined as a  
14  
15 280 persistent imbalance between the excessive production of reactive oxygen species  
16  
17 281 and/or defects in antioxidant defense, has been implicated in the pathogenesis of  
18  
19 282 diabetic complications.<sup>57</sup> Moreover, low serum Mg levels are strongly related to  
20  
21 283 elevated serum concentrations of both tumor necrosis factor alpha and C-reactive  
22  
23 284 protein (CRP),<sup>65</sup> suggesting that Mg deficiency may contribute to the development of  
24  
25 285 low-grade chronic inflammation syndrome and the development of glucose metabolic  
26  
27 286 disorders through the former pathway. In addition, lower Mg concentration can  
28  
29 287 enhance calcium-mediated vasoconstriction, blunt cardiac and smooth muscle  
30  
31 288 relaxation, and thus contribute to BP elevation.<sup>55</sup> However, the decreased serum  
32  
33 289 calcium concentration in radiographic knee OA patients may weaken the association  
34  
35 290 between Mg and HP.<sup>66</sup>

36  
37 291 MetS<sup>21 22</sup> and DM<sup>4 23 24</sup> were reported to be the risk factors of OA progression.  
38  
39 292 Moreover, serum Mg level has been proved to be significantly associated with the  
40  
41 293 CRP concentration,<sup>27 67-69</sup> and higher CRP might serve as a prediction factor for OA  
42  
43 294 progression.<sup>70 71</sup> Thus, OA progression may be delayed by elevating the serum Mg  
44  
45 295 level through reducing the prevalence of MetS and DM and decreasing the level of  
46  
47 296 CRP. Above all, the present study indicated that the elevation of serum Mg level has  
48  
49 297 the potential to reduce the prevalence of MetS, DM and HU in knee OA patients and  
50  
51 298 thereby may delay the progression of knee OA. However, the specific mechanism  
52  
53 299 needs to be further explored.

54  
55 300 The present study has several strengths. Firstly, this is the first study examining  
56  
57 301 the associations between serum Mg and the prevalence of MetS, DM, HP and HU in  
58  
59 302 radiographic knee OA patients. The results of this study will provide a new insight  
60  
303 into the treatment of knee OA. Secondly, the multivariable logistical regression

1  
2  
3 304 models were adjusted for a considerable number of potential confounding factors,  
4  
5 305 which greatly improved the reliability of the results. Thirdly, the kidney is the key  
6  
7 306 organ in maintaining Mg homeostasis. This study conducted a sensitivity analysis by  
8  
9 307 adding eGFR into multivariable logistic regression models which showed that the  
10  
11 308 reverse associations remained significant.

12 309 Limitations of the present study should also be admitted. The cross-sectional  
13  
14 310 design precludes causal correlations, so further prospective studies and intervention  
15  
16 311 trials should be undertaken to establish a causal association between serum Mg with  
17  
18 312 the prevalence of MetS, DM, HP and HU in radiographic knee OA patients. Since no  
19  
20 313 previous research investigated such associations in knee OA patients, the value of this  
21  
22 314 study should not be blotted out by the cross-sectional nature. Another limitation of  
23  
24 315 this study lies in the relatively small sample size, and thus, extensive high-quality  
25  
26 316 researches based on a larger sample are needed. Moreover, the dietary intake of Mg in  
27  
28 317 relation to the prevalence of MetS, DM, HP and HU were not assessed in the present  
29  
30 318 study. Last but not the least, it is important to highlight that Mg is an intracellular ion;  
31  
32 319 therefore, the serum Mg concentration must be considered as a poor indicator of body  
33  
34 320 Mg content,<sup>72</sup> even though it has been used in many studies. However, blood Mg level  
35  
36 321 is the second best indicator of body status.<sup>73</sup>

37 322

### 38 323 **Conclusions**

39  
40 324 The present study concluded that the serum Mg concentration was inversely  
41  
42 325 associated with the prevalence of MetS, DM and HU in radiographic knee OA  
43  
44 326 patients.

45 327  
46  
47  
48  
49  
50  
51  
52  
53  
54  
55  
56  
57  
58  
59  
60

1  
2  
3 **328 Contributors**  
4

5 329 All authors had full access to the data in the study and take responsibility for the  
6 330 integrity of the data and the accuracy of the data analysis. GHJ, YLW and JW  
7 331 conceived the study. GHJ, YLW and JW were responsible for conception and design  
8 332 of the study and drafted the manuscript. CZ, TY, HL, YC and DXX contributed to  
9 333 data collection. WJ contributed to preparation and data analysis. BX, ZCL, JTL, and  
10 334 SDJ contributed to study retrieval. GHJ and YLW contributed to revision of the  
11 335 manuscript. All the authors contributed to the interpretation of the data and critically  
12 336 reviewed the manuscript for publication.  
13  
14  
15  
16  
17  
18  
19  
20

21 **338 Funding**  
22

23 339 This work was supported by the Innovation Foundation of the Central South  
24 340 University for Postgraduate (2018zzts045), the Postdoctoral Science Foundation of  
25 341 Central South University (182130), the National Natural Science Foundation of China  
26 342 (No. 81201420, 81272034, 81472130, 81501923), the Provincial Science Foundation  
27 343 of Hunan (No. 14JJ3032), the Scientific Research Project of the Development and  
28 344 Reform Commission of Hunan Province ([2013]1199), the Scientific Research Project  
29 345 of Science and Technology Office of Hunan Province (2013SK2018), the Doctoral  
30 346 Scientific Fund Project of the Ministry of Education of China (20120162110036).  
31  
32  
33  
34  
35  
36  
37  
38  
39

40 **348 Competing interests**  
41

42 349 The authors declare that they have no conflict of interest.  
43  
44

45 **351 Ethics approval**  
46

47 352 The protocol of this study was reviewed and approved by the Ethics Committee at  
48 353 Xiangya Hospital.  
49  
50

51 **355 Data sharing statement**  
52

53 356 The datasets during the current study available from the corresponding author on  
54 357 reasonable request.  
55  
56  
57  
58  
59  
60



358

359 **REFERENCE**

- 360 1 Zhuo Q, Yang W, Chen J, *et al.* Metabolic syndrome meets osteoarthritis. *Nat*  
361 *Rev Rheumatol* 2012;8(12):729-37.
- 362 2 Katz JD, Agrawal S, Velasquez M. Getting to the heart of the matter:  
363 osteoarthritis takes its place as part of the metabolic syndrome. *Curr Opin*  
364 *Rheumatol* 2010;22(5):512-9.
- 365 3 Berenbaum F. Diabetes-induced osteoarthritis: from a new paradigm to a new  
366 phenotype. *Ann Rheum Dis* 2011;70(8):1354-6.
- 367 4 King KB, Rosenthal AK. The adverse effects of diabetes on osteoarthritis: update  
368 on clinical evidence and molecular mechanisms. *Osteoarthritis Cartilage*  
369 2015;23(6):841-50.
- 370 5 Kirkman MS. Osteoarthritis progression: is diabetes a culprit? *Osteoarthritis*  
371 *Cartilage* 2015;23(6):839-40.
- 372 6 Sellam J, Berenbaum F. Is osteoarthritis a metabolic disease? *Joint Bone Spine*  
373 2013;80(6):568-73.
- 374 7 Puenpatom RA, Victor TW. Increased prevalence of metabolic syndrome in  
375 individuals with osteoarthritis: an analysis of NHANES III data. *Postgrad Med*  
376 2009;121(6):9-20.
- 377 8 Shin D. Association between metabolic syndrome, radiographic knee  
378 osteoarthritis, and intensity of knee pain: results of a national survey. *J Clin*  
379 *Endocrinol Metab* 2014;99(9):3177-83.
- 380 9 Calvet J, Orellana C, Larrosa M, *et al.* High prevalence of cardiovascular  
381 co-morbidities in patients with symptomatic knee or hand osteoarthritis. *Scand J*  
382 *Rheumatol* 2015:1-4.
- 383 10 Rahman MM, Kopec JA, Cibere J, *et al.* The relationship between osteoarthritis  
384 and cardiovascular disease in a population health survey: a cross-sectional study.  
385 *BMJ Open* 2013;3(5):e2624.
- 386 11 Inoue R, Ishibashi Y, Tsuda E, *et al.* Medical problems and risk factors of  
387 metabolic syndrome among radiographic knee osteoarthritis patients in the



- 1  
2  
3 388 Japanese general population. *J Orthop Sci* 2011;16(6):704-9.
- 4  
5 389 12 Hart DJ, Doyle DV, Spector TD. Association between metabolic factors and knee  
6  
7 390 osteoarthritis in women: the Chingford Study. *J Rheumatol* 1995;22(6):1118-23.
- 8  
9 391 13 Jungmann PM, Kraus MS, Alizai H, *et al.* Association of metabolic risk factors  
10  
11 392 with cartilage degradation assessed by T2 relaxation time at the knee: data from  
12  
13 393 the osteoarthritis initiative. *Arthritis Care Res (Hoboken)* 2013;65(12):1942-50.
- 14  
15 394 14 Anagnostopoulos I, Zinzaras E, Alexiou I, *et al.* The prevalence of rheumatic  
16  
17 395 diseases in central Greece: a population survey. *BMC Musculoskelet Disord*  
18  
19 396 2010;11:98.
- 20  
21 397 15 Massengale M, Reichmann WM, Losina E, *et al.* The relationship between hand  
22  
23 398 osteoarthritis and serum leptin concentration in participants of the Third National  
24  
25 399 Health and Nutrition Examination Survey. *Arthritis Res Ther* 2012;14(3):R132.
- 26  
27 400 16 Nieves-Plaza M, Castro-Santana LE, Font YM, *et al.* Association of hand or knee  
28  
29 401 osteoarthritis with diabetes mellitus in a population of Hispanics from Puerto  
30  
31 402 Rico. *J Clin Rheumatol* 2013;19(1):1-6.
- 32  
33 403 17 Greiver M, Williamson T, Barber D, *et al.* Prevalence and epidemiology of  
34  
35 404 diabetes in Canadian primary care practices: a report from the Canadian Primary  
36  
37 405 Care Sentinel Surveillance Network. *Can J Diabetes* 2014;38(3):179-85.
- 38  
39 406 18 Rahman MM, Cibere J, Anis AH, *et al.* Risk of Type 2 Diabetes among  
40  
41 407 Osteoarthritis Patients in a Prospective Longitudinal Study. *Int J Rheumatol*  
42  
43 408 2014;2014:620920.
- 44  
45 409 19 Reid JL, Morton DJ, Wingard DL, *et al.* Obesity and other cardiovascular disease  
46  
47 410 risk factors and their association with osteoarthritis in Southern California  
48  
49 411 American Indians, 2002-2006. *Ethn Dis* 2010;20(4):416-22.
- 50  
51 412 20 Birtwhistle R, Morkem R, Peat G, *et al.* Prevalence and management of  
52  
53 413 osteoarthritis in primary care: an epidemiologic cohort study from the Canadian  
54  
55 414 Primary Care Sentinel Surveillance Network. *CMAJ Open* 2015;3(3):E270-5.
- 56  
57 415 21 Yoshimura N, Muraki S, Oka H, *et al.* Accumulation of metabolic risk factors  
58  
59 416 such as overweight, hypertension, dyslipidaemia, and impaired glucose tolerance  
60 417 raises the risk of occurrence and progression of knee osteoarthritis: a 3-year

- 1  
2  
3 418 follow-up of the ROAD study. *Osteoarthritis Cartilage* 2012;20(11):1217-26.  
4  
5 419 22 Monira HS, Wang Y, Cicuttini FM, *et al.* Incidence of total knee and hip  
6  
7 420 replacement for osteoarthritis in relation to the metabolic syndrome and its  
8  
9 421 components: a prospective cohort study. *Semin Arthritis Rheum*  
10  
11 422 2014;43(4):429-36.  
12  
13 423 23 Schett G, Kleyer A, Perricone C, *et al.* Diabetes is an independent predictor for  
14  
15 424 severe osteoarthritis: results from a longitudinal cohort study. *Diabetes Care*  
16  
17 425 2013;36(2):403-9.  
18  
19 426 24 Eymard F, Parsons C, Edwards MH, *et al.* Diabetes is a risk factor for knee  
20  
21 427 osteoarthritis progression. *Osteoarthritis Cartilage* 2015;23(6):851-9.  
22  
23 428 25 Guerrero-Romero F, Rodriguez-Moran M. Low serum magnesium levels and  
24  
25 429 metabolic syndrome. *Acta Diabetol* 2002;39(4):209-13.  
26  
27 430 26 Guerrero-Romero F, Rodriguez-Moran M. Hypomagnesemia, oxidative stress,  
28  
29 431 inflammation, and metabolic syndrome. *Diabetes Metab Res Rev*  
30  
31 432 2006;22(6):471-6.  
32  
33 433 27 Evangelopoulos AA, Vallianou NG, Panagiotakos DB, *et al.* An inverse  
34  
35 434 relationship between cumulating components of the metabolic syndrome and  
36  
37 435 serum magnesium levels. *Nutr Res* 2008;28(10):659-63.  
38  
39 436 28 Hjelmessaeth J, Hofso D, Aasheim ET, *et al.* Parathyroid hormone, but not  
40  
41 437 vitamin D, is associated with the metabolic syndrome in morbidly obese women  
42  
43 438 and men: a cross-sectional study. *Cardiovasc Diabetol* 2009;8:7.  
44  
45 439 29 Lima ML, Cruz T, Rodrigues LE, *et al.* Serum and intracellular magnesium  
46  
47 440 deficiency in patients with metabolic syndrome--evidences for its relation to  
48  
49 441 insulin resistance. *Diabetes Res Clin Pract* 2009;83(2):257-62.  
50  
51 442 30 Ma J, Folsom AR, Melnick SL, *et al.* Associations of serum and dietary  
52  
53 443 magnesium with cardiovascular disease, hypertension, diabetes, insulin, and  
54  
55 444 carotid arterial wall thickness: the ARIC study. Atherosclerosis Risk in  
56  
57 445 Communities Study. *J Clin Epidemiol* 1995;48(7):927-40.  
58  
59 446 31 Kao WH, Folsom AR, Nieto FJ, *et al.* Serum and dietary magnesium and the risk  
60  
447 for type 2 diabetes mellitus: the Atherosclerosis Risk in Communities Study.

- 1  
2  
3 448 *Arch Intern Med* 1999;159(18):2151-9.
- 4  
5 449 32 Wang JL, Shaw NS, Yeh HY, *et al.* Magnesium status and association with  
6  
7 450 diabetes in the Taiwanese elderly. *Asia Pac J Clin Nutr* 2005;14(3):263-9.
- 8  
9 451 33 Chambers EC, Heshka S, Gallagher D, *et al.* Serum magnesium and type-2  
10  
11 452 diabetes in African Americans and Hispanics: a New York cohort. *J Am Coll*  
12  
13 453 *Nutr* 2006;25(6):509-13.
- 14  
15 454 34 Simmons D, Joshi S, Shaw J. Hypomagnesaemia is associated with diabetes: Not  
16  
17 455 pre-diabetes, obesity or the metabolic syndrome. *Diabetes Res Clin Pract*  
18  
19 456 2010;87(2):261-6.
- 20  
21 457 35 Sales CH, Pedrosa LF, Lima JG, *et al.* Influence of magnesium status and  
22  
23 458 magnesium intake on the blood glucose control in patients with type 2 diabetes.  
24  
25 459 *Clin Nutr* 2011;30(3):359-64.
- 26  
27 460 36 Lecube A, Baena-Fustegueras JA, Fort JM, *et al.* Diabetes is the main factor  
28  
29 461 accounting for hypomagnesemia in obese subjects. *PLoS One* 2012;7(1):e30599.
- 30  
31 462 37 Xu J, Xu W, Yao H, *et al.* Associations of serum and urinary magnesium with the  
32  
33 463 pre-diabetes, diabetes and diabetic complications in the Chinese Northeast  
34  
35 464 population. *PLoS One* 2013;8(2):e56750.
- 36  
37 465 38 Yang SJ, Hwang SY, Baik SH, *et al.* Serum magnesium level is associated with  
38  
39 466 type 2 diabetes in women with a history of gestational diabetes mellitus: the  
40  
41 467 Korea National Diabetes Program study. *J Korean Med Sci* 2014;29(1):84-9.
- 42  
43 468 39 Singh RB, Rastogi V, Niaz MA, *et al.* Epidemiological study of magnesium  
44  
45 469 status and risk of hypertension in a rural population of north India. *Magnes Res*  
46  
47 470 1996;9(3):173-81.
- 48  
49 471 40 Peacock JM, Folsom AR, Arnett DK, *et al.* Relationship of serum and dietary  
50  
51 472 magnesium to incident hypertension: the Atherosclerosis Risk in Communities  
52  
53 473 (ARIC) Study. *Ann Epidemiol* 1999;9(3):159-65.
- 54  
55 474 41 Guerrero-Romero F, Rodriguez-Moran M, Hernandez-Ronquillo G, *et al.* Low  
56  
57 475 Serum Magnesium Levels and Its Association with High Blood Pressure in  
58  
59 476 Children. *J Pediatr* 2016;168:93-8.
- 60 477 42 Zeng C, Wang YL, Wei J, *et al.* Association between low serum magnesium

- 1  
2  
3 478 concentration and hyperuricemia. *Magnes Res* 2015;28(2):56-63.
- 4  
5 479 43 Zeng C, Wei J, Li H, *et al.* Relationship between Serum Magnesium  
6  
7 480 Concentration and Radiographic Knee Osteoarthritis. *J Rheumatol*  
8  
9 481 2015;42(7):1231-6.
- 10  
11 482 44 Wei J, Zeng C, Gong QY, *et al.* Associations between Dietary Antioxidant Intake  
12  
13 483 and Metabolic Syndrome. *PLoS One* 2015;10(6):e130876.
- 14  
15 484 45 Xie DX, Xiong YL, Zeng C, *et al.* Association between low dietary zinc and  
16  
17 485 hyperuricaemia in middle-aged and older males in China: a cross-sectional study.  
18  
19 486 *BMJ Open* 2015;5(10):e8637.
- 20  
21 487 46 Wei J, Zeng C, Gong QY, *et al.* The association between dietary selenium intake  
22  
23 488 and diabetes: a cross-sectional study among middle-aged and older adults. *Nutr J*  
24  
25 489 2015;14:18.
- 26  
27 490 47 Expert Panel on Metabolic Syndrome of Chinese Diabetes Society:  
28  
29 491 Recommendations on metabolic syndrome of Chinese Diabetes Society (Chinese).  
30  
31 492 *Chin J Diabetes* 2004;14:156-61.
- 32  
33 493 48 Pang C, Jia L, Hou X, *et al.* The significance of screening for microvascular  
34  
35 494 diseases in Chinese community-based subjects with various metabolic  
36  
37 495 abnormalities. *PLoS One* 2014;9(5):e97928.
- 38  
39 496 49 Zhou H, Guo ZR, Yu LG, *et al.* Evidence on the applicability of the ATPIII, IDF  
40  
41 497 and CDS metabolic syndrome diagnostic criteria to identify CVD and T2DM in  
42  
43 498 the Chinese population from a 6.3-year cohort study in mid-eastern China.  
44  
45 499 *Diabetes Res Clin Pract* 2010;90(3):319-25.
- 46  
47 500 50 Levey AS, Stevens LA, Schmid CH, *et al.* A new equation to estimate glomerular  
48  
49 501 filtration rate. *Ann Intern Med* 2009;150(9):604-12.
- 50  
51 502 51 Joosten MM, Gansevoort RT, Mukamal KJ, *et al.* Urinary magnesium excretion  
52  
53 503 and risk of hypertension: the prevention of renal and vascular end-stage disease  
54  
55 504 study. *Hypertension* 2013;61(6):1161-7.
- 56  
57 505 52 Choi MK, Bae YJ. Association of Magnesium Intake with High Blood Pressure  
58  
59 506 in Korean Adults: Korea National Health and Nutrition Examination Survey  
60  
507 2007-2009. *PLoS One* 2015;10(6):e130405.

- 1  
2  
3 508 53 R Development Core Team. R: A Language and Environment for Statistical  
4 Computing, Vienna, Austria: R Foundation for Statistical Computing. 2016.  
5 509  
6  
7 510 54 Grundy SM, Cleeman JI, Daniels SR, *et al.* Diagnosis and management of the  
8 metabolic syndrome: an American Heart Association/National Heart, Lung, and  
9 511  
10 512 Blood Institute Scientific Statement. *Circulation* 2005;112(17):2735-52.  
11  
12 513 55 Barbagallo M, Dominguez LJ, Galioto A, *et al.* Role of magnesium in insulin  
13 action, diabetes and cardio-metabolic syndrome X. *Mol Aspects Med*  
14 514  
15 2003;24(1-3):39-52.  
16 515  
17 516 56 Song Y, Ridker PM, Manson JE, *et al.* Magnesium intake, C-reactive protein, and  
18 the prevalence of metabolic syndrome in middle-aged and older U.S. women.  
19 517  
20 518 *Diabetes Care* 2005;28(6):1438-44.  
21  
22 519 57 Guerrero-Romero F, Rodriguez-Moran M. Complementary therapies for diabetes:  
23 the case for chromium, magnesium, and antioxidants. *Arch Med Res*  
24 520  
25 2005;36(3):250-7.  
26 521  
27 522 58 Huerta MG, Roemmich JN, Kington ML, *et al.* Magnesium deficiency is  
28 associated with insulin resistance in obese children. *Diabetes Care*  
29 523  
30 2005;28(5):1175-81.  
31 524  
32 525 59 Djurhuus MS, Skott P, Hother-Nielson O, *et al.* Insulin increases renal  
33 magnesium excretion: a possible cause of magnesium depletion in  
34 hyperinsulinaemic states. *Diabet Med* 1995;12(8):664-9.  
35 526  
36 527  
37 528 60 Paolisso G, Sgambato S, Passariello N, *et al.* Insulin induces opposite changes in  
38 plasma and erythrocyte magnesium concentrations in normal man. *Diabetologia*  
39 529  
40 1986;29(9):644-7.  
41 530  
42 531 61 Bonora E, Targher G, Zenere MB, *et al.* Relationship of uric acid concentration to  
43 cardiovascular risk factors in young men. Role of obesity and central fat  
44 532  
45 533 distribution. The Verona Young Men Atherosclerosis Risk Factors Study. *Int J*  
46 534  
47 535 *Obes Relat Metab Disord* 1996;20(11):975-80.  
48  
49 536 62 Lyngdoh T, Marques-Vidal P, Paccaud F, *et al.* Elevated serum uric acid is  
50 associated with high circulating inflammatory cytokines in the population-based  
51 537  
52 ColaUS study. *PLoS One* 2011;6(5):e19901.

- 1  
2  
3 538 63 Kirilmaz B, Asgun F, Alioglu E, *et al.* High inflammatory activity related to the  
4 539 number of metabolic syndrome components. *J Clin Hypertens (Greenwich)*  
5 2010;12(2):136-44.  
6  
7 540  
8  
9 541 64 Salmonowicz B, Krzystek-Korpacka M, Noczynska A. Trace elements,  
10 542 magnesium, and the efficacy of antioxidant systems in children with type 1  
11 543 diabetes mellitus and in their siblings. *Adv Clin Exp Med* 2014;23(2):259-68.  
12  
13 544 65 Rodríguez-Morán M, Guerrero-Romero F. Elevated serum concentration of  
14 545 tumor necrosis factor-alpha is linked to low serum magnesium levels in the  
15 546 obesity-related inflammatory response. *Magnes Res* 2004;17:189-96.  
16  
17 547 66 Li H, Zeng C, Wei J, *et al.* Serum Calcium Concentration Is Inversely Associated  
18 548 With Radiographic Knee Osteoarthritis: A Cross-Sectional Study. *Medicine*  
19 549 (*Baltimore*) 2016;95(6):e2838.  
20  
21 550 67 Chacko SA, Song Y, Nathan L, *et al.* Relations of dietary magnesium intake to  
22 551 biomarkers of inflammation and endothelial dysfunction in an ethnically diverse  
23 552 cohort of postmenopausal women. *Diabetes Care* 2010;33(2):304-10.  
24  
25 553 68 Bo S, Durazzo M, Guidi S, *et al.* Dietary magnesium and fiber intakes and  
26 554 inflammatory and metabolic indicators in middle-aged subjects from a  
27 555 population-based cohort. *Am J Clin Nutr* 2006;84(5):1062-9.  
28  
29 556 69 Kim DJ, Xun P, Liu K, *et al.* Magnesium intake in relation to systemic  
30 557 inflammation, insulin resistance, and the incidence of diabetes. *Diabetes Care*  
31 558 2010;33(12):2604-10.  
32  
33 559 70 Spector TD, Hart DJ, Nandra D, *et al.* Low-level increases in serum C-reactive  
34 560 protein are present in early osteoarthritis of the knee and predict progressive  
35 561 disease. *Arthritis Rheum* 1997;40(4):723-7.  
36  
37 562 71 Smith JW, Martins TB, Gopez E, *et al.* Significance of C-reactive protein in  
38 563 osteoarthritis and total knee arthroplasty outcomes. *Ther Adv Musculoskelet Dis*  
39 564 2012;4(5):315-25.  
40  
41 565 72 Topf JM, Murray PT. Hypomagnesemia and hypermagnesemia. *Rev Endocr*  
42 566 *Metab Disord* 2003;4(2):195-206.  
43  
44 567 73 Sabatier M, Pont F, Arnaud MJ, *et al.* A compartmental model of magnesium  
45  
46  
47  
48  
49  
50  
51  
52  
53  
54  
55  
56  
57  
58  
59  
60

1  
2  
3  
4  
5  
6  
7  
8  
9  
10  
11  
12  
13  
14  
15  
16  
17  
18  
19  
20  
21  
22  
23  
24  
25  
26  
27  
28  
29  
30  
31  
32  
33  
34  
35  
36  
37  
38  
39  
40  
41  
42  
43  
44  
45  
46  
47  
48  
49  
50  
51  
52  
53  
54  
55  
56  
57  
58  
59  
60

568 metabolism in healthy men based on two stable isotope tracers. *Am J Physiol*  
569 *Regul Integr Comp Physiol* 2003;285(3):R656-63.  
570

For peer review only



571 Table 1 Basic characteristics of included subjects according to quintiles of serum Mg (n=962)

|                                  | Quintiles of serum Mg |              |              |              |              | P     |
|----------------------------------|-----------------------|--------------|--------------|--------------|--------------|-------|
|                                  | Q1 (lowest)           | Q2           | Q3           | Q4           | Q5 (highest) |       |
| Median Mg concentration (mmol/L) | 0.82                  | 0.87         | 0.91         | 0.94         | 0.99         | -     |
| Participants (n)                 | 200                   | 215          | 190          | 168          | 189          | -     |
| Age (years)                      | 53.8 (7.3)            | 54.6 (7.6)   | 55.2 (7.9)   | 55.3 (7.1)   | 56.1 (8.0)   | 0.062 |
| BMI (kg/m <sup>2</sup> )         | 25.2 (3.2)            | 24.9 (3.2)   | 25.0 (3.7)   | 25.2 (3.4)   | 24.6 (3.2)   | 0.464 |
| Female (%)                       | 37.5                  | 42.3         | 36.8         | 42.3         | 37.0         | 0.627 |
| Smoking (%)                      | 27.5                  | 27.4         | 21.6         | 24.4         | 21.7         | 0.457 |
| Alcohol drinking (%)             | 34.5                  | 36.3         | 40.5         | 41.1         | 38.1         | 0.645 |
| High school diploma (%)          | 45.0                  | 47.4         | 45.3         | 56.5         | 48.1         | 0.184 |
| Activity level (h/w)             | 2.0 (3.5)             | 2.0 (3.3)    | 2.3 (3.5)    | 2.1 (3.1)    | 2.4 (3.5)    | 0.457 |
| Fasting glucose (mmol/l)         | 6.6 (3.0)             | 5.7 (1.7)    | 5.7 (1.4)    | 5.5 (0.9)    | 5.5 (1.6)    | 0.009 |
| Systolic pressure (mm Hg)        | 129.2 (16.9)          | 128.3 (17.9) | 130.4 (16.2) | 128.8 (16.3) | 129.6 (17.7) | 0.837 |
| Diastolic pressure (mm Hg)       | 81.2 (11.8)           | 79.8 (12.1)  | 80.7 (11.0)  | 80.7 (10.7)  | 80.3 (10.5)  | 0.654 |
| HDL-cholesterol (mmol/l)         | 1.5 (0.4)             | 1.5 (0.4)    | 1.5 (0.4)    | 1.5 (0.3)    | 1.5 (0.4)    | 0.374 |
| Triglyceride (mmol/l)            | 2.1 (1.9)             | 1.8 (1.5)    | 2.0 (2.1)    | 1.8 (1.0)    | 2.3 (2.9)    | 0.620 |



1  
2  
3  
4  
5  
6  
7  
8  
9  
10  
11  
12  
13  
14  
15  
16  
17  
18  
19  
20  
21  
22  
23  
24  
25  
26  
27  
28  
29  
30  
31  
32  
33  
34  
35  
36  
37  
38  
39  
40  
41  
42  
43  
44  
45  
46  
47

|                                   |               |              |              |              |              |        |
|-----------------------------------|---------------|--------------|--------------|--------------|--------------|--------|
| Uric acid (µmol/l)                | 337.3 (101.7) | 329.0 (80.7) | 321.3 (86.3) | 331.5 (78.0) | 329.4 (81.7) | 0.590  |
| eGFR (ml/min/1.73m <sup>2</sup> ) | 80.2 (14.4)   | 77.7 (10.7)  | 76.0 (10.6)  | 75.8 (10.7)  | 74.3 (12.0)  | <0.001 |
| MetS (%)                          | 26.5          | 17.7         | 25.8         | 19.6         | 17.5         | 0.059  |
| DM (%)                            | 23.5          | 10.7         | 10.0         | 8.3          | 6.3          | <0.001 |
| HP (%)                            | 40.0          | 33.5         | 37.4         | 42.3         | 40.2         | 0.432  |
| HU (%)                            | 25.5          | 19.1         | 13.2         | 18.5         | 14.8         | 0.018  |

572 Data are mean (Standard Deviation), unless otherwise indicated; Mg, magnesium; OA, osteoarthritis; BMI, body mass index; HDL, high density lipoprotein; eGFR,  
573 estimated glomerular filtration rate; MetS, metabolic syndrome; DM, diabetes mellitus; HP, hypertension; HU, hyperuricemia.  
574 # P values are for test of difference across all quintiles of serum Mg.

1  
2  
3  
4  
5  
6  
7 576 Figure 1 The prevalence of MetS (A), DM (B), HP (C) and HU (D) in each quintile of serum Mg in radiographic knee OA patients

8 577 The figures above present the prevalence of MetS (A), DM (B), HP (C) and HU (D) among the 962 OA patients under different quintiles of serum Mg levels. The

9  
10 578 horizontal axis denotes the serum Mg level, and the vertical axis indicates whether a subject is diagnosed with the specific disease: (+) - disease; (-) - no disease.

11  
12 579 The solid gray lines represent the boundaries in between the five quintiles of serum Mg levels. The red and black spots represent the prevalence of diseases and no

13  
14 580 diseases at each serum Mg level, respectively. The darker the color of a spot, the more OA patients there are at the corresponding concentration.

15  
16 581

582 Table 2 Multivariable-adjusted relations of serum Mg and MetS in OA patients (n = 962)

|                                  | Quintiles of serum Mg |                   |                   |                   |                   | <i>P</i> for trend |
|----------------------------------|-----------------------|-------------------|-------------------|-------------------|-------------------|--------------------|
|                                  | Q1 (lowest)           | Q2                | Q3                | Q4                | Q5 (highest)      |                    |
| Median Mg concentration (mmol/L) | 0.82                  | 0.87              | 0.91              | 0.94              | 0.99              | -                  |
| Participants (n)                 | 200                   | 215               | 190               | 168               | 189               | -                  |
| MetS (%)                         | 26.5                  | 17.7              | 25.8              | 19.6              | 17.5              | -                  |
| Model 1*                         | 1.00 (reference)      | 0.61 (0.38, 0.97) | 0.97 (0.61, 1.52) | 0.69 (0.42, 1.14) | 0.59 (0.36, 0.96) | 0.090              |
| <i>P</i> value                   | -                     | 0.038             | 0.881             | 0.150             | 0.035             | -                  |
| Model 2*                         | 1.00 (reference)      | 0.60 (0.37, 0.96) | 1.00 (0.63, 1.57) | 0.70 (0.42, 1.15) | 0.61 (0.37, 0.99) | 0.120              |
| <i>P</i> value                   | -                     | 0.035             | 0.99              | 0.160             | 0.047             | -                  |
| Model 3*                         | 1.00 (reference)      | 0.59 (0.36, 0.94) | 0.95 (0.60, 1.51) | 0.67 (0.40, 1.10) | 0.56 (0.34, 0.93) | 0.067              |
| <i>P</i> value                   | -                     | 0.027             | 0.830             | 0.114             | 0.024             | -                  |

583 Data are adjusted OR (95% CI), unless otherwise indicated; Mg, magnesium; n, number; OA, osteoarthritis; MetS, metabolic syndrome.

584 \*Model 1 was adjusted for age (continuous data) and gender (male, female); Model 2 was adjusted for age (continuous data), gender (male, female), educational  
585 level (high school or above, lower than high school), smoking status (yes, no), activity level (continuous data), alcohol drinking status (yes, no); Model 3 was  
586 adjusted based on model 2, with additional factor of eGFR (continuous data).

587

588 Table 3 Multivariable-adjusted relations of serum Mg and DM in OA patients (n = 962)

|                                  | Quintiles of serum Mg |                   |                   |                   |                   | <i>P</i> for trend |
|----------------------------------|-----------------------|-------------------|-------------------|-------------------|-------------------|--------------------|
|                                  | Q1 (lowest)           | Q2                | Q3                | Q4                | Q5 (highest)      |                    |
| Median Mg concentration (mmol/L) | 0.82                  | 0.87              | 0.91              | 0.94              | 0.99              | -                  |
| Participants (n)                 | 200                   | 215               | 190               | 168               | 189               | -                  |
| DM (%)                           | 23.5                  | 10.7              | 10.0              | 8.3               | 6.3               | -                  |
| Model 1*                         | 1.00 (reference)      | 0.38 (0.22, 0.66) | 0.34 (0.19, 0.61) | 0.29 (0.15, 0.55) | 0.20 (0.10, 0.40) | <0.001             |
| <i>P</i> value                   | -                     | 0.001             | <0.001            | <0.001            | <0.001            | -                  |
| Model 2*                         | 1.00 (reference)      | 0.40 (0.23, 0.70) | 0.32 (0.18, 0.59) | 0.26 (0.13, 0.50) | 0.21 (0.11, 0.42) | <0.001             |
| <i>P</i> value                   | -                     | 0.001             | <0.001            | <0.001            | <0.001            | -                  |
| Model 3*                         | 1.00 (reference)      | 0.40 (0.23, 0.70) | 0.33 (0.18, 0.60) | 0.27 (0.14, 0.52) | 0.22 (0.11, 0.44) | <0.001             |
| <i>P</i> value                   | -                     | 0.001             | <0.001            | <0.001            | <0.001            | -                  |

589 Data are adjusted OR (95% CI), unless otherwise indicated; Mg, magnesium; n, number; OA, osteoarthritis; DM, diabetes mellitus.

590 \*Model 1 was adjusted for age (continuous data) and gender (male, female); Model 2 was adjusted for age (continuous data), BMI (continuous data), gender (male,  
 591 female), educational level (high school or above, lower than high school), smoking status (yes, no), activity level (continuous data), alcohol drinking status (yes, no),  
 592 hypertension (yes, no), and dyslipidemia (yes, no); Model 3 was adjusted based on model 2, with additional factor of eGFR (continuous data).

593

594 Table 4 Multivariable-adjusted relations of serum Mg and HP in OA patients (n = 962)

|                                  | Quintiles of serum Mg |                   |                   |                   |                   | <i>P</i> for trend |
|----------------------------------|-----------------------|-------------------|-------------------|-------------------|-------------------|--------------------|
|                                  | Q1 (lowest)           | Q2                | Q3                | Q4                | Q5 (highest)      |                    |
| Median Mg concentration (mmol/L) | 0.82                  | 0.87              | 0.91              | 0.94              | 0.99              | -                  |
| Participants (n)                 | 200                   | 215               | 190               | 168               | 189               | -                  |
| HP (%)                           | 40.0                  | 33.5              | 37.4              | 42.3              | 40.2              | -                  |
| Model 1*                         | 1.00 (reference)      | 0.71 (0.47, 1.06) | 0.83 (0.54, 1.25) | 1.00 (0.66, 1.54) | 0.89 (0.59, 1.35) | 0.929              |
| <i>P</i> value                   | -                     | 0.095             | 0.368             | 0.987             | 0.582             | -                  |
| Model 2*                         | 1.00 (reference)      | 0.77 (0.50, 1.19) | 0.89 (0.57, 1.39) | 1.10 (0.70, 1.74) | 1.08 (0.69, 1.68) | 0.377              |
| <i>P</i> value                   | -                     | 0.245             | 0.608             | 0.686             | 0.744             | -                  |
| Model 3*                         | 1.00 (reference)      | 0.77 (0.50, 1.19) | 0.88 (0.56, 1.38) | 1.09 (0.68, 1.72) | 1.05 (0.67, 1.65) | 0.434              |
| <i>P</i> value                   | -                     | 0.235             | 0.574             | 0.727             | 0.818             | -                  |

595 Data are adjusted OR (95% CI), unless otherwise indicated; Mg, magnesium; n, number; OA, osteoarthritis; HP, hypertension.

596 \* Model 1 was adjusted for age (continuous data) and gender (male, female); Model 2 was adjusted for age (continuous data), BMI (continuous data), gender (male,  
597 female), educational level (high school or above, lower than high school), smoking status (yes, no), activity level (continuous data), alcohol drinking status (yes, no),  
598 diabetes (yes, no), and dyslipidemia (yes, no); Model 3 was adjusted based on model 2, with additional factor of eGFR (continuous data).

599

600 Table 5 Multivariable-adjusted relations of serum Mg and HU in OA patients (n = 962)

|                                  | Quintiles of serum Mg |                   |                   |                   |                   | <i>P</i> for trend |
|----------------------------------|-----------------------|-------------------|-------------------|-------------------|-------------------|--------------------|
|                                  | Q1 (lowest)           | Q2                | Q3                | Q4                | Q5 (highest)      |                    |
| Median Mg concentration (mmol/L) | 0.82                  | 0.87              | 0.91              | 0.94              | 0.99              | -                  |
| Participants (n)                 | 200                   | 215               | 190               | 168               | 189               | -                  |
| HU (%)                           | 25.5                  | 19.1              | 13.2              | 18.5              | 14.8              | -                  |
| Model 1*                         | 1.00 (reference)      | 0.71 (0.44, 1.14) | 0.44 (0.26, 0.75) | 0.68 (0.41, 1.14) | 0.51 (0.30, 0.85) | 0.008              |
| <i>P</i> value                   | -                     | 0.157             | 0.002             | 0.144             | 0.010             | -                  |
| Model 2*                         | 1.00 (reference)      | 0.73 (0.45, 1.20) | 0.38 (0.22, 0.67) | 0.59 (0.35, 1.02) | 0.50 (0.29, 0.87) | 0.006              |
| <i>P</i> value                   | -                     | 0.210             | 0.001             | 0.058             | 0.013             | -                  |
| Model 3*                         | 1.00 (reference)      | 0.68 (0.41, 1.14) | 0.33 (0.19, 0.59) | 0.52 (0.30, 0.91) | 0.39 (0.22, 0.70) | <0.001             |
| <i>P</i> value                   | -                     | 0.142             | <0.001            | 0.022             | 0.001             | -                  |

601 Data are adjusted OR (95% CI), unless otherwise indicated; Mg, magnesium; n, number; OA, osteoarthritis; HU, hyperuricemia.

602 \* Model 1 was adjusted for age (continuous data) and gender (male, female); Model 2 was adjusted for age (continuous data), BMI (continuous data), gender (male,  
 603 female), educational level (high school or above, lower than high school), smoking status (yes, no), activity level (continuous data), alcohol drinking status (yes, no),  
 604 hypertension (yes, no), diabetes (yes, no), and dyslipidemia (yes, no); Model 3 was adjusted based on model 2, with additional factor of eGFR (continuous data)



Figure 1 The prevalence of MetS (A), DM (B), HP (C) and HU (D) in each quintile of serum Mg in radiographic knee OA patients

The figures above present the prevalence of MetS (A), DM (B), HP (C) and HU (D) among the 962 OA patients under different quintiles of serum Mg levels. The horizontal axis denotes the serum Mg level, and the vertical axis indicates whether a subject is diagnosed with the specific disease: (+) - disease; (-) - no disease. The solid gray lines represent the boundaries in between the five quintiles of serum Mg levels. The red and black spots represent the prevalence of diseases and no diseases at each serum Mg level, respectively. The darker the color of a spot, the more OA patients there are at the corresponding concentration.

549x304mm (300 x 300 DPI)

## STROBE Statement—checklist of items that should be included in reports of observational studies

|                           | Item No | Recommendation                                                                                                                                                                             | Reported on Page No |
|---------------------------|---------|--------------------------------------------------------------------------------------------------------------------------------------------------------------------------------------------|---------------------|
| <b>Title and abstract</b> | 1       | (a) Indicate the study's design with a commonly used term in the title or the abstract                                                                                                     | 2                   |
|                           |         | (b) Provide in the abstract an informative and balanced summary of what was done and what was found                                                                                        | 2                   |
| <b>Introduction</b>       |         |                                                                                                                                                                                            |                     |
| Background/rationale      | 2       | Explain the scientific background and rationale for the investigation being reported                                                                                                       | 4                   |
| Objectives                | 3       | State specific objectives, including any prespecified hypotheses                                                                                                                           | 4                   |
| <b>Methods</b>            |         |                                                                                                                                                                                            |                     |
| Study design              | 4       | Present key elements of study design early in the paper                                                                                                                                    | 4-5                 |
| Setting                   | 5       | Describe the setting, locations, and relevant dates, including periods of recruitment, exposure, follow-up, and data collection                                                            | 4-5                 |
| Participants              | 6       | (a) <i>Cohort study</i> —Give the eligibility criteria, and the sources and methods of selection of participants. Describe methods of follow-up                                            | 4-5                 |
|                           |         | <i>Case-control study</i> —Give the eligibility criteria, and the sources and methods of case ascertainment and control selection. Give the rationale for the choice of cases and controls |                     |
|                           |         | <i>Cross-sectional study</i> —Give the eligibility criteria, and the sources and methods of selection of participants                                                                      |                     |
|                           |         | (b) <i>Cohort study</i> —For matched studies, give matching criteria and number of exposed and unexposed                                                                                   | -                   |
|                           |         | <i>Case-control study</i> —For matched studies, give matching criteria and the number of controls per case                                                                                 |                     |
| Variables                 | 7       | Clearly define all outcomes, exposures, predictors, potential confounders, and effect modifiers. Give diagnostic criteria, if applicable                                                   | 4-6                 |
| Data sources/measurement  | 8*      | For each variable of interest, give sources of data and details of methods of assessment (measurement). Describe comparability of assessment methods if there is more than one group       | 5-6                 |
| Bias                      | 9       | Describe any efforts to address potential sources of bias                                                                                                                                  | 6-7                 |
| Study size                | 10      | Explain how the study size was arrived at                                                                                                                                                  | 4-5                 |
| Quantitative variables    | 11      | Explain how quantitative variables were handled in the analyses. If applicable, describe which groupings were chosen and why                                                               | 6-7                 |
| Statistical methods       | 12      | (a) Describe all statistical methods, including those used to control for confounding                                                                                                      | 6-7                 |
|                           |         | (b) Describe any methods used to examine subgroups and interactions                                                                                                                        | -                   |
|                           |         | (c) Explain how missing data were addressed                                                                                                                                                | -                   |
|                           |         | (d) <i>Cohort study</i> —If applicable, explain how loss to follow-up was addressed                                                                                                        | 4-5                 |
|                           |         | <i>Case-control study</i> —If applicable, explain how matching of cases and controls was addressed                                                                                         |                     |
|                           |         | <i>Cross-sectional study</i> —If applicable, describe analytical methods taking account of sampling strategy                                                                               |                     |
|                           |         | (e) Describe any sensitivity analyses                                                                                                                                                      | 6-7                 |

Continued on next page



**Results**

|                          |     |                                                                                                                                                                                                              |       |
|--------------------------|-----|--------------------------------------------------------------------------------------------------------------------------------------------------------------------------------------------------------------|-------|
| Participants             | 13* | (a) Report numbers of individuals at each stage of study—eg numbers potentially eligible, examined for eligibility, confirmed eligible, included in the study, completing follow-up, and analysed            | 4-5   |
|                          |     | (b) Give reasons for non-participation at each stage                                                                                                                                                         | 4-5   |
|                          |     | (c) Consider use of a flow diagram                                                                                                                                                                           | -     |
| Descriptive data         | 14* | (a) Give characteristics of study participants (eg demographic, clinical, social) and information on exposures and potential confounders                                                                     | 8     |
|                          |     | (b) Indicate number of participants with missing data for each variable of interest                                                                                                                          | -     |
|                          |     | (c) <i>Cohort study</i> —Summarise follow-up time (eg, average and total amount)                                                                                                                             | -     |
| Outcome data             | 15* | <i>Cohort study</i> —Report numbers of outcome events or summary measures over time                                                                                                                          | -     |
|                          |     | <i>Case-control study</i> —Report numbers in each exposure category, or summary measures of exposure                                                                                                         | -     |
|                          |     | <i>Cross-sectional study</i> —Report numbers of outcome events or summary measures                                                                                                                           | 8-10  |
| Main results             | 16  | (a) Give unadjusted estimates and, if applicable, confounder-adjusted estimates and their precision (eg, 95% confidence interval). Make clear which confounders were adjusted for and why they were included | 8-10  |
|                          |     | (b) Report category boundaries when continuous variables were categorized                                                                                                                                    | 8-10  |
|                          |     | (c) If relevant, consider translating estimates of relative risk into absolute risk for a meaningful time period                                                                                             | -     |
| Other analyses           | 17  | Report other analyses done—eg analyses of subgroups and interactions, and sensitivity analyses                                                                                                               | 8-10  |
| <b>Discussion</b>        |     |                                                                                                                                                                                                              |       |
| Key results              | 18  | Summarise key results with reference to study objectives                                                                                                                                                     | 10    |
| Limitations              | 19  | Discuss limitations of the study, taking into account sources of potential bias or imprecision. Discuss both direction and magnitude of any potential bias                                                   | 11-12 |
| Interpretation           | 20  | Give a cautious overall interpretation of results considering objectives, limitations, multiplicity of analyses, results from similar studies, and other relevant evidence                                   | 10-11 |
| Generalisability         | 21  | Discuss the generalisability (external validity) of the study results                                                                                                                                        | 11-12 |
| <b>Other information</b> |     |                                                                                                                                                                                                              |       |
| Funding                  | 22  | Give the source of funding and the role of the funders for the present study and, if applicable, for the original study on which the present article is based                                                | 13    |

\*Give information separately for cases and controls in case-control studies and, if applicable, for exposed and unexposed groups in cohort and cross-sectional studies.

**Note:** An Explanation and Elaboration article discusses each checklist item and gives methodological background and published examples of transparent reporting. The STROBE checklist is best used in conjunction with this article (freely available on the Web sites of PLoS Medicine at <http://www.plosmedicine.org/>, Annals of Internal Medicine at <http://www.annals.org/>, and Epidemiology at <http://www.epidem.com/>). Information on the STROBE Initiative is available at [www.strobe-statement.org](http://www.strobe-statement.org).
